# Supplementary material for: Asymmetric chlorination of 4-substituted pyrazolones catalyzed by natural cinchona alkaloid
Source: Royal Society of Chemistry journal article supplement (doi:10.1039/c6cc06236a), 2016-01-01

## Asymmetric Chlorination of 4-Substituted Pyrazolones Catalyzed by Natural Cinchona Alkaloid

Xiaoze Bao, Shiqiang Wei, Liwei Zou, Yuli He, Fuzhao Xue, Jingping Qu and Baomin Wang\*

State Key Laboratory of Fine Chemicals, School of Pharmaceutical Science and Technology,  
Dalian University of Technology, Dalian 116024, P. R. China

E-mail: bmwang@dlut.edu.cn

### Contents:

|                                                                                            |     |
|--------------------------------------------------------------------------------------------|-----|
| 1. General information -----                                                               | S1  |
| 2. Experimental procedures and characterization of products <b>3a-r</b> , <b>4-6</b> ----- | S1  |
| 3. Figure S-1-----                                                                         | S3  |
| 4. Figure S-2-----                                                                         | S3  |
| 5. Reference-----                                                                          | S21 |
| 6. NMR spectra for compounds -----                                                         | S22 |

## 1. General information

Unless otherwise noted, materials were purchased from commercial suppliers and used without further purification. Column chromatography was performed on silica gel (100~200 mesh). Enantiomeric excesses (*ee*) were determined by HPLC using corresponding commercial chiral columns as stated at 30 °C with UV detector at 254 nm. Optical rotations were reported as follows:  $[\alpha]_D^{25}$  (*c* g/100 mL, solvent). All  $^1\text{H}$  NMR and  $^{19}\text{F}$  NMR spectra were recorded on a Bruker Avance II 400 MHz and Bruker Avance III 471 MHz respectively,  $^{13}\text{C}$  NMR spectra were recorded on a Bruker Avance II 101 MHz or Bruker Avance III 126 MHz with chemical shifts reported as ppm (in  $\text{CDCl}_3$ , TMS as internal standard). Data for  $^1\text{H}$  NMR are recorded as follows: chemical shift ( $\delta$ , ppm), multiplicity (s = singlet, d = doublet, t = triplet, m = multiplet, br = broad singlet, dd = doublet doublet, coupling constants in Hz, integration). HRMS (ESI) was obtained with a HRMS/MS instrument (LTQ Orbitrap XL TM). The absolute configuration of **3p** was assigned by the X-ray analysis.

4-substituted pyrazolones **1a-r** were prepared from  $\beta$ -keto esters according to the literature.<sup>[1]</sup> The chlorinating reagents **2a-d** were commercially available and used directly. The racemic product was synthesized using corresponding pyrazolones and NCS without catalyst.

## 2. Experimental procedures and characterization of products 3a-r, 4-6

### General procedure: synthesis of compound 3a-r

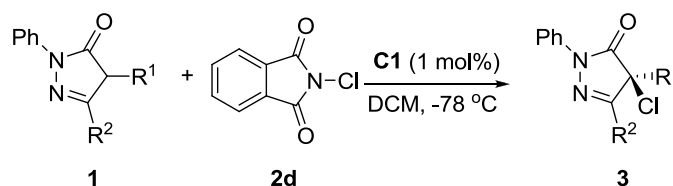

To a Schlenk tube equipped with a magnetic stir bar was charged with 4-substituted pyrazolone **1** (0.2 mmol, 1.0 eq.) and 1 mL of a fresh solution of the catalyst **C1** (0.002 M in DCM, 0.01 eq.), followed with DCM (3 mL). After cooled to -78 °C for 15 min, the chlorinating reagent **2d** (0.22 mmol, 1.1 eq.) was added in one portion. The reaction was detected by TLC. After the consumption of **1**, the reaction mixture was warmed to rt, and purified by column chromatography on silica gel directly to give the product **3**.

### Gram synthesis of compound 3a

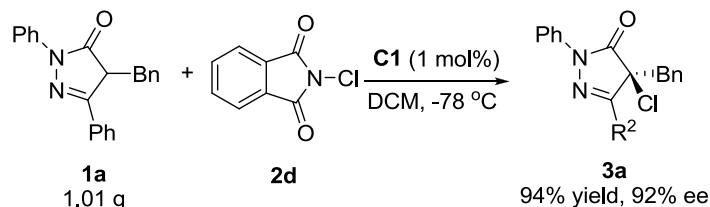

To a Schlenk tube equipped with a magnetic stir bar was charged with 4-substituted pyrazolone **1a** (1.01 g, 4.3 mmol, 1.0 eq.) and **C1** (14 mg, 0.043 mmol, 0.01 eq.), followed with DCM (86 mL). After cooled to -78 °C for 15 min, the chlorinating reagent **2d** (0.86 g, 4.7 mmol, 1.1 eq.) was added in one portion. The reaction was detected by TLC. After the consumption of **1a**, the reaction mixture was warmed to rt. The solvent was removed under vacuum and the residue was purified by column chromatography on silica gel directly to give the product **3a** as light

yellow oil (1.45 g, 94% yield, 92% ee).

#### Synthesis of (*R*)-4-azido-4-benzyl-1,3-diphenyl-4,5-dihydro-1*H*-pyrazol-5-one (**4**)

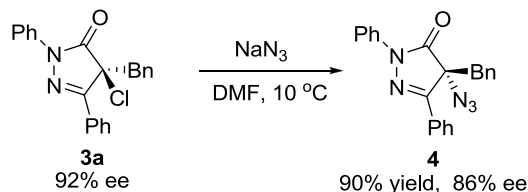

To a solution of **4** (72 mg, 0.2 mmol, 1.0 eq.) in DMF (3.0 mL) was added NaN<sub>3</sub> (39 mg, 0.6 mmol, 3.0 eq.), and the resulting mixture was stirred at 10 °C for 3 h (detected by TLC). The mixture was diluted by H<sub>2</sub>O (15 mL), then extracted with Et<sub>2</sub>O (10 mL×3). The combined organic layer was washed with water and brine, dried over Na<sub>2</sub>SO<sub>4</sub>, concentrated. The crude mixture was purified by column chromatography (EtOAc/petroleum ether = 1/20) to give 90% yield of **4** as an oil (66.1 mg, 90% yield, 86% ee).

#### Synthesis of (*R*)-4-benzyl-1,3-diphenyl-4-(4-phenyl-1*H*-1,2,3-triazol-1-yl)-4,5-dihydro-1*H*-pyrazol-5-one (**5**)

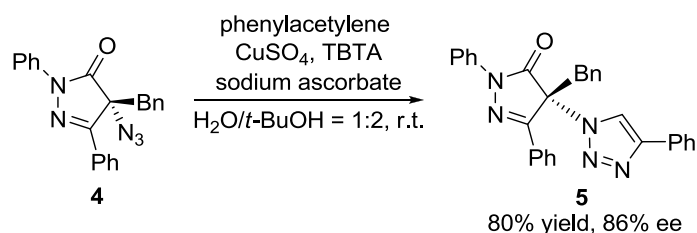

Azide **4** (0.16 mmol, 1.0 eq.) was dissolved in a 2:1 mixture of *t*BuOH and water (900 μL). Benzyne (19.3 mg, 0.19 mmol, 1.2 equiv.), CuSO<sub>4</sub> (5.1 mg, 0.03 mmol, 0.2 equiv.), sodium ascorbate (12.6 mg, 0.06 mmol, 0.4 equiv.) and tris[(1-benzyl-1*H*-1,2,3-triazol-4-yl)methyl]amine (TBTA) (0.8 mg, 1 mol%) were added and the solution was stirred at room temperature for 12 h. The reaction mixture was diluted with water (15 mL) and extracted with CH<sub>2</sub>Cl<sub>2</sub> (3×15 mL). The combined organic phases were washed with brine, dried over NaSO<sub>4</sub> and the solvent was evaporated. The crude mixture was purified by silica gel column chromatography (EtOAc/petroleum ether = 1/6) to give **5** as white foam (60.2 mg, 80% yield, 86% ee).

#### Synthesis of (*S*)-4-chloro-1,3-diphenyl-4-((3-phenylisoxazol-5-yl)methyl)-1*H*-pyrazol-5-one (**6**)

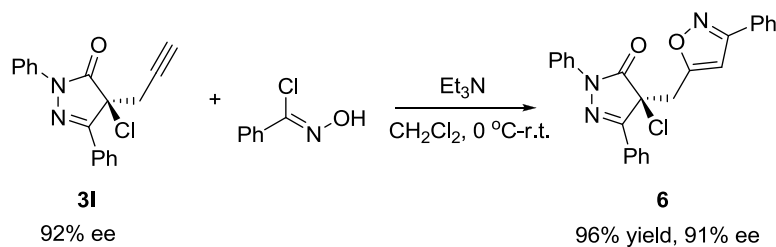

Triethylamine (0.30 mmol, 2.0 eq.) was added to a solution of chlorobenzaldoxime (0.30 mmol, 2.0 eq.) in dry CH<sub>2</sub>Cl<sub>2</sub> (2.0 mL) at 0 °C. After stirring for 10 min a solution of (*S*)-**3I** (0.15 mmol, 92 % ee, 1.0 eq.) in dry CH<sub>2</sub>Cl<sub>2</sub> (1.0 mL) was added dropwise. The mixture was stirred at

room temperature for 36 h. Then the reaction was quenched with water (5 mL) and the organic layer was separated. The aqueous layer was extracted with CH<sub>2</sub>Cl<sub>2</sub> (10 mL). The combined organic layers were dried with anhydrous Na<sub>2</sub>SO<sub>4</sub> and concentrated. Chromatography on silica gel (EtOAc/petroleum ether = 1/10) afforded the product **6** (61.1 mg, yield 96 %, 91% ee) as oil.

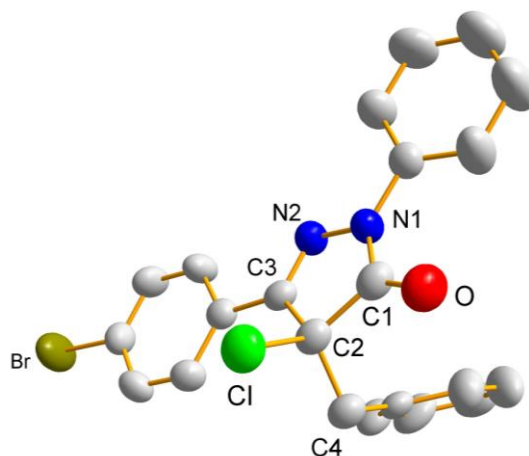

**Figure S-1** X-ray crystal structure of the product **3p**.

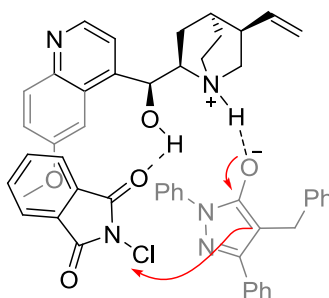

**Figure S-2** The stereochemical working model.

The quinuclidine moiety serves as a Lewis base to enhance the nucleophilicity of the pyraolone, while the carbonyl group of the chlorinating reagent was activated and locked through hydrogen bonding with the hydroxyl group at 9-position of the quinidine simultaneously. Thus the nucleophilic attack of the pyrazolone to the chlorine affords the (*S*)-chlorinated product.

**(*S*)-4-benzyl-4-chloro-1,3-diphenyl-1*H*-pyrazol-5(4*H*)-one (**3a**)**

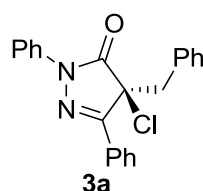

Prepared according to the general procedure with a reaction time of 20 min as yellow oil (68.4 mg, 95% yield) after silica gel chromatography (EtOAc/petroleum ether = 1/20). [ $\alpha$ ]<sub>D</sub><sup>21</sup> = -91.3 (*c* 0.66, CH<sub>2</sub>Cl<sub>2</sub>); <sup>1</sup>H NMR (400 MHz, CDCl<sub>3</sub>) 8.08-8.16 (m, 2H), 7.72 (d, *J* = 8.0 Hz, 2H), 7.54-7.50 (m, 3H), 7.37 (t, *J* = 7.9 Hz, 2H), 7.21 (t, *J* = 7.4 Hz, 1H), 7.13-7.04 (m, 3H), 6.85 (d, *J* = 7.3 Hz, 2H), 3.76 (d, *J* = 13.2 Hz, 1H), 3.69 (d, *J* = 13.2 Hz, 1H); <sup>13</sup>C NMR (101 MHz, CDCl<sub>3</sub>)  $\delta$  169.6, 155.1, 137.1, 131.9, 131.1, 129.8, 129.6, 129.0, 128.9, 128.4, 128.0, 126.8, 126.0, 119.5, 64.4, 44.0; IR (KBr): 3062, 3025, 2920, 1727, 1597, 1497, 1391, 1327, 1132, 758, 725, 689 cm<sup>-1</sup>; HRMS (EI) *m/z* Calcd. for C<sub>22</sub>H<sub>17</sub>ClN<sub>2</sub>NaO ([M+Na]<sup>+</sup>) 383.0922, Found 383.0923; Enantiomeric excess was determined to be 92% (determined by HPLC using chiral OD-H column,

hexane/2-propanol = 98/2,  $\lambda$  = 254 nm, 30 °C, 0.5 mL/min,  $t_{\text{major}}$  = 13.9 min,  $t_{\text{minor}}$  = 12.7 min).

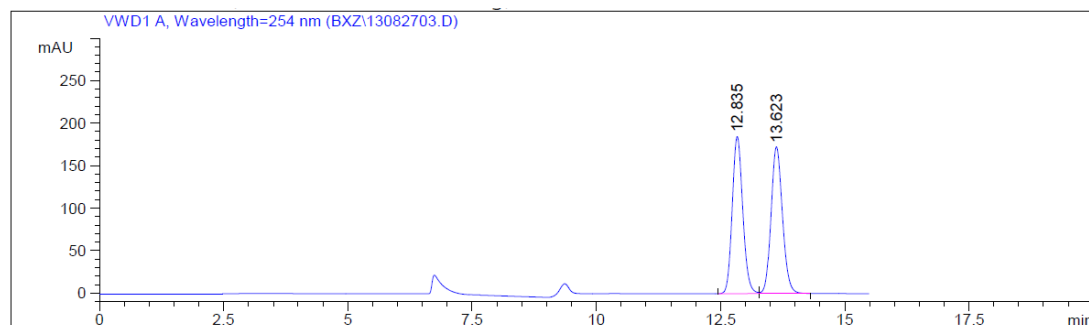

| Peak # | RetTime [min] | Type | Width [min] | Area mAU *s | Height [mAU] | Area %  |
|--------|---------------|------|-------------|-------------|--------------|---------|
| 1      | 12.835        | BV   | 0.2282      | 2740.88086  | 185.00984    | 49.8318 |
| 2      | 13.623        | VB   | 0.2446      | 2759.38110  | 172.73917    | 50.1682 |

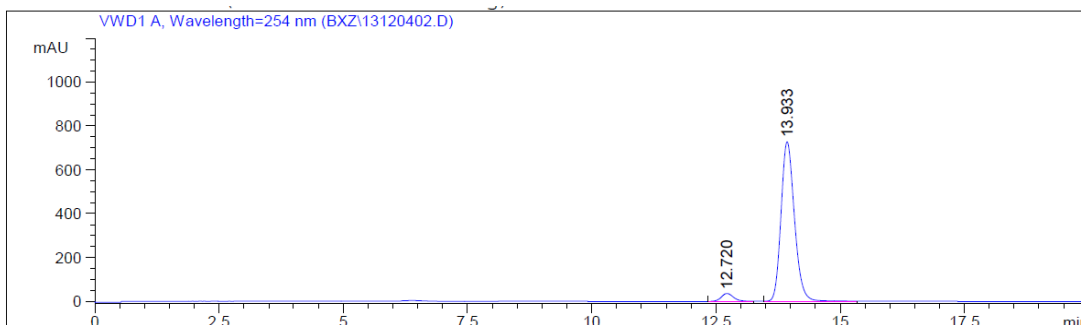

| Peak # | RetTime [min] | Type | Width [min] | Area mAU *s | Height [mAU] | Area %  |
|--------|---------------|------|-------------|-------------|--------------|---------|
| 1      | 12.720        | PB   | 0.2589      | 600.05554   | 35.93446     | 4.1969  |
| 2      | 13.933        | PB   | 0.2897      | 1.36976e4   | 727.03949    | 95.8031 |

### (S)-4-chloro-4-(3-methylbenzyl)-1,3-diphenyl-1H-pyrazol-5(4H)-one (3b)

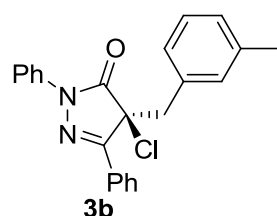

Prepared according to the general procedure with a reaction time of 30 min as yellow oil (70.3 mg, 94% yield) after silica gel chromatography (EtOAc/petroleum ether = 1/20).  $[\alpha]_{\text{D}}^{21} = -99.3$  (c 0.64,  $\text{CH}_2\text{Cl}_2$ );  $^1\text{H}$  NMR (400 MHz,  $\text{CDCl}_3$ )  $\delta$  8.04 (d,  $J$  = 7.3 Hz, 2H), 7.73 (d,  $J$  = 8.1 Hz, 2H), 7.52-7.47 (m, 3H), 7.37 (t,  $J$  = 7.5 Hz, 2H), 7.20 (t,  $J$  = 7.5 Hz, 1H), 6.98-6.86 (m, 2H), 6.63 (d,  $J$  = 9.4 Hz, 2H), 3.72 (d,  $J$  = 13.1 Hz, 1H), 3.62 (d,  $J$  = 13.1 Hz, 1H), 2.04 (s, 3H);  $^{13}\text{C}$  NMR (101 MHz,  $\text{CDCl}_3$ )  $\delta$  169.7, 155.3, 138.0, 137.2, 131.8, 131.0, 130.6, 129.8, 129.0, 128.9, 128.7, 128.3, 126.9, 126.7, 126.0, 119.6, 64.5, 44.0, 21.1; IR (KBr): 3032, 2920, 2845, 1727, 1597, 1497, 1391, 1327, 1132, 766, 750, 690  $\text{cm}^{-1}$ ; HRMS (ESI)  $m/z$  Calcd. for  $\text{C}_{23}\text{H}_{20}\text{ClN}_2\text{O}$  ( $[\text{M}+\text{H}]^+$ ) 375.1259, Found 375.1247; Enantiomeric excess was determined to be 93% (determined by HPLC using chiral OJ-H column, hexane/2-propanol = 98/2,  $\lambda$  = 254 nm, 30 °C, 0.8 mL/min,  $t_{\text{major}}$  = 13.8 min,  $t_{\text{minor}}$  = 10.6 min).

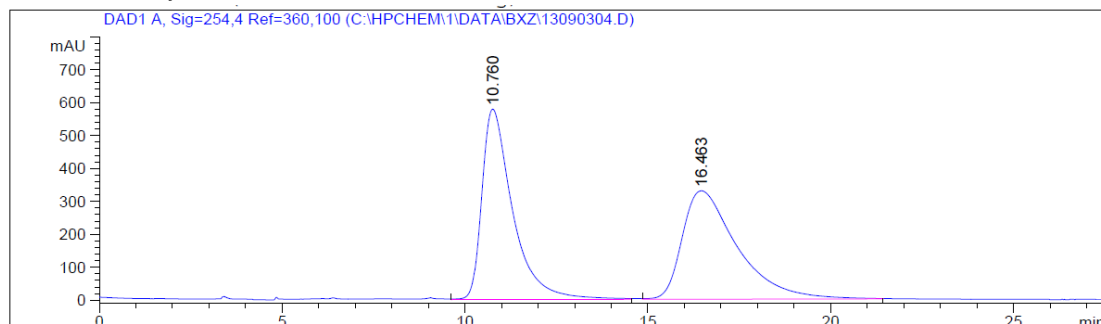

| Peak # | RetTime [min] | Type | Width [min] | Area [mAU*s] | Height [mAU] | Area %  |
|--------|---------------|------|-------------|--------------|--------------|---------|
| 1      | 10.760        | VB   | 0.8712      | 3.38423e4    | 577.88141    | 49.6380 |
| 2      | 16.463        | BB   | 1.5219      | 3.43359e4    | 328.91537    | 50.3620 |

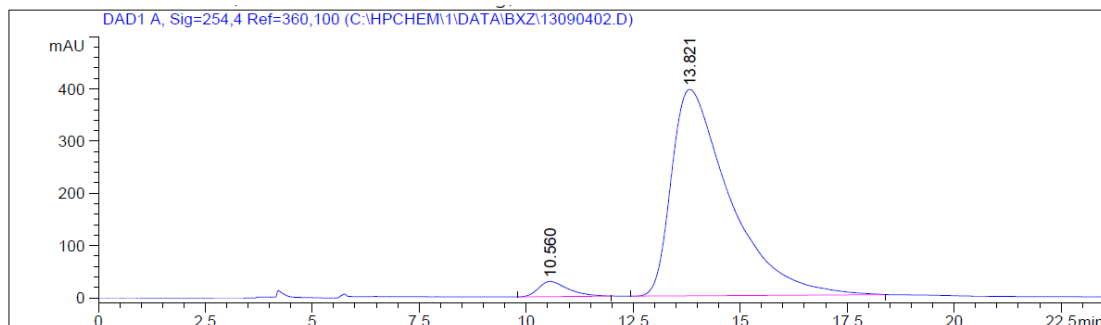

| Peak # | RetTime [min] | Type | Width [min] | Area [mAU*s] | Height [mAU] | Area %  |
|--------|---------------|------|-------------|--------------|--------------|---------|
| 1      | 10.560        | BB   | 0.6684      | 1396.34888   | 29.17399     | 3.5908  |
| 2      | 13.821        | PB   | 1.3396      | 3.74907e4    | 394.88492    | 96.4092 |

### (S)-4-chloro-4-(4-methoxybenzyl)-1,3-diphenyl-1H-pyrazol-5(4H)-one (3c)

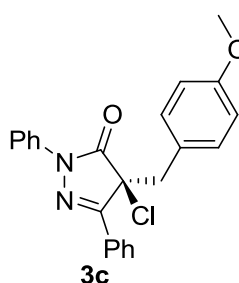

Prepared according to the general procedure with a reaction time of 35 min as yellow oil (71.0 mg, 91% yield) after silica gel chromatography (EtOAc/petroleum ether = 1/20).  $[\alpha]_D^{21} = -76.5$  ( $c$  0.68,  $\text{CH}_2\text{Cl}_2$ );  $^1\text{H}$  NMR (400 MHz,  $\text{CDCl}_3$ )  $\delta$  8.14-7.99 (m, 2H), 7.75 (d,  $J = 8.0$  Hz, 2H), 7.60-7.43 (m, 3H), 7.37 (t,  $J = 8.0$  Hz, 2H), 7.20 (t,  $J = 7.3$  Hz, 1H), 6.76 (d,  $J = 8.7$  Hz, 2H), 6.56 (d,  $J = 8.7$  Hz, 2H), 3.70 (d,  $J = 13.4$  Hz, 1H), 3.63 (d,  $J = 13.2$  Hz, 1H), 3.63 (s, 3H);  $^{13}\text{C}$  NMR (101 MHz,  $\text{CDCl}_3$ )  $\delta$  169.7, 159.2, 155.2, 137.2, 131.1, 130.9, 129.7, 129.0, 128.9, 126.8, 125.9, 123.8, 119.5, 113.8, 64.4, 55.1, 43.2; IR (KBr): 3032, 2957, 2927, 2830, 1727, 1610, 1596, 1391, 1253, 1180, 1133, 1033, 756, 690  $\text{cm}^{-1}$ ; HRMS (ESI)  $m/z$  Calcd. for  $\text{C}_{23}\text{H}_{19}\text{ClN}_2\text{NaO}_2$  ( $[\text{M}+\text{Na}]^+$ ) 413.1027, Found 413.1012; Enantiomeric excess was determined to be 92% (determined by HPLC using chiral OD-H column, hexane/2-propanol = 98/2,  $\lambda = 254$  nm, 30  $^\circ\text{C}$ , 0.5 mL/min,  $t_{\text{major}} = 18.1$  min,  $t_{\text{minor}} = 16.9$  min).

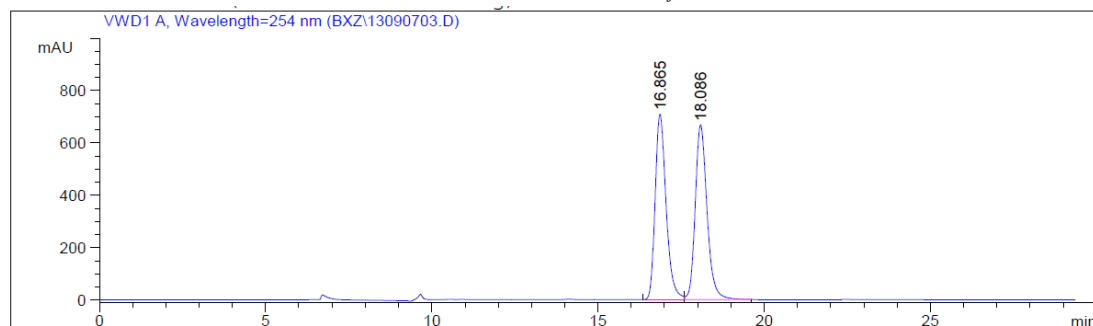

| Peak # | RetTime [min] | Type | Width [min] | Area [mAU*s] | Height [mAU] | Area %  |
|--------|---------------|------|-------------|--------------|--------------|---------|
| 1      | 16.865        | BV   | 0.3533      | 1.62215e4    | 707.85663    | 49.6471 |
| 2      | 18.086        | VB   | 0.3796      | 1.64521e4    | 666.68188    | 50.3529 |

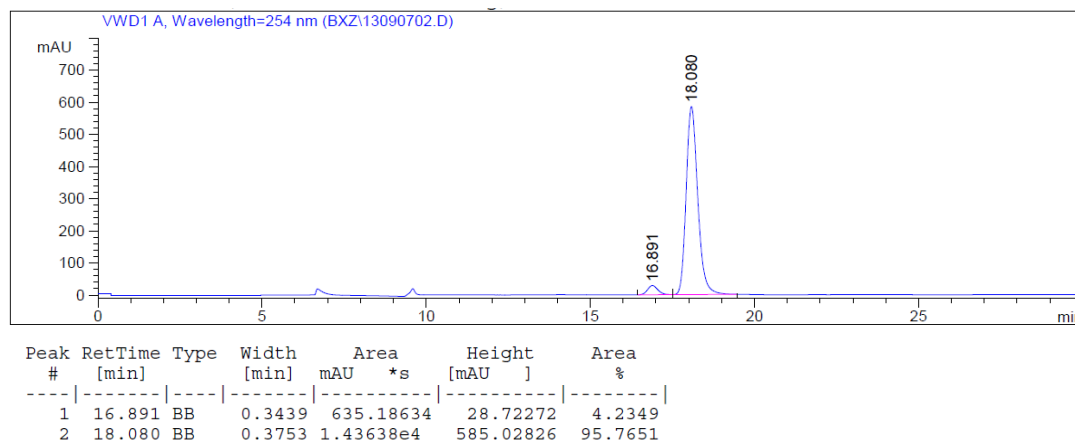

**(S)-4-chloro-4-(4-methoxybenzyl)-1,3-diphenyl-1H-pyrazol-5(4H)-one (3d)**

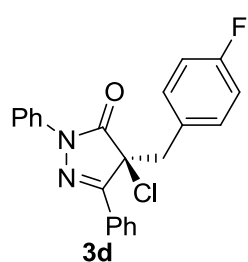

Prepared according to the general procedure with a reaction time of 30 min as yellow oil (68.9 mg, 91% yield) after silica gel chromatography (EtOAc/petroleum ether = 1/20).  $[\alpha]_D^{21} = -87.8$  ( $c$  0.58,  $\text{CH}_2\text{Cl}_2$ );  $^1\text{H}$  NMR (400 MHz,  $\text{CDCl}_3$ )  $\delta$  8.13-8.00 (m, 2H), 7.74 (d,  $J = 7.8$  Hz, 2H), 7.57-7.46 (m, 3H), 7.38 (t,  $J = 7.9$  Hz, 2H), 7.21 (t,  $J = 7.4$  Hz, 1H), 6.88-6.65 (m, 4H), 3.72 (d,  $J = 13.3$  Hz, 1H), 3.65 (d,  $J = 13.3$  Hz, 1H);  $^{13}\text{C}$  NMR (101 MHz,  $\text{CDCl}_3$ )  $\delta$  169.5, 162.4 (d,  $J = 248.5$ ), 155.0, 137.0, 131.52 (d,  $J = 8.1$  Hz), 131.2, 129.5, 129.0 (d,  $J = 15.4$  Hz), 127.7 (d,  $J = 3.3$  Hz), 126.8, 126.1, 119.4, 115.6, 115.4, 64.2 (d,  $J = 1.8$  Hz), 43.1;  $^{19}\text{F}$  NMR (376 MHz,  $\text{CDCl}_3$ )  $\delta$  -113.52 (1F, s); IR (KBr): 3039, 2920, 1728, 1597, 1509, 1391, 1225, 1160, 1132, 838, 756, 690  $\text{cm}^{-1}$ ; HRMS (ESI)  $m/z$  Calcd. for  $\text{C}_{22}\text{H}_{16}\text{ClFN}_2\text{NaO}$  ( $[\text{M}+\text{Na}]^+$ ) 401.0827, Found 401.0813; Enantiomeric excess was determined to be 90% (determined by HPLC using chiral AD-H column, hexane/2-propanol = 98/2,  $\lambda = 254$  nm, 30  $^\circ\text{C}$ , 0.8 mL/min,  $t_{\text{major}} = 11.5$  min,  $t_{\text{minor}} = 14.4$  min).

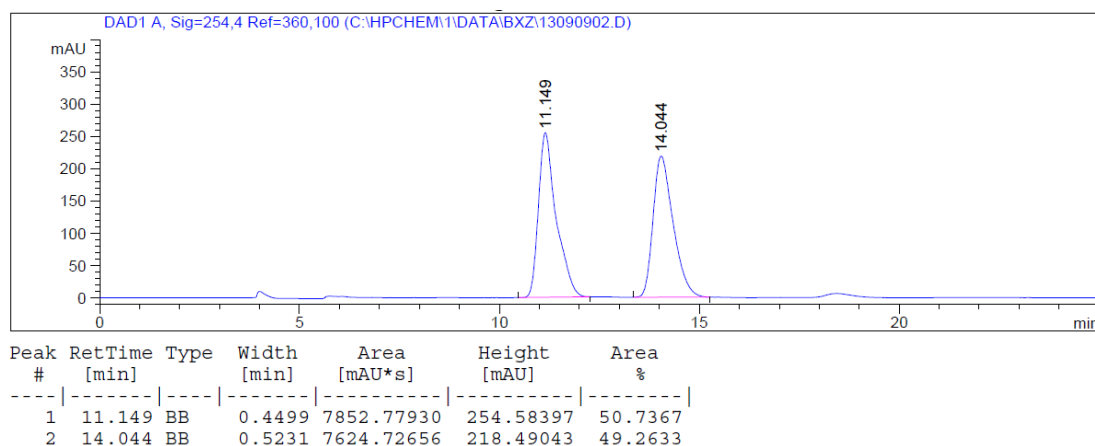

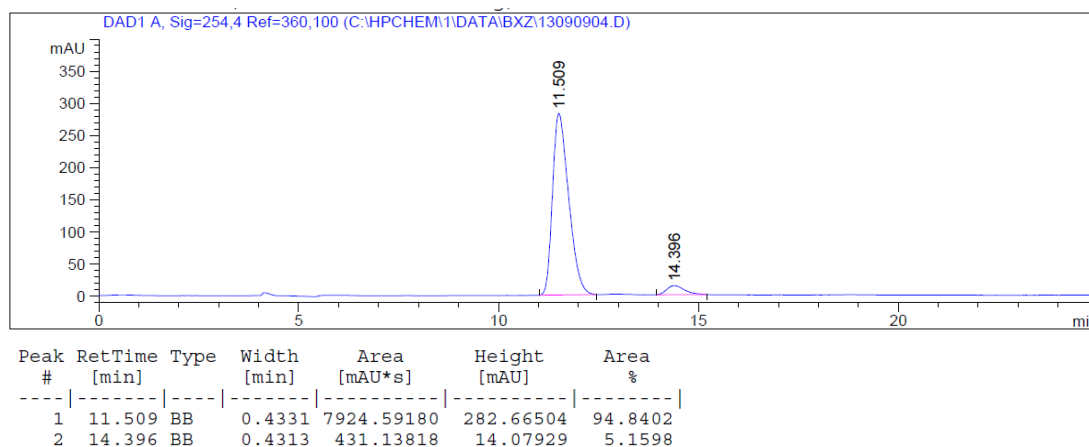

**(S)-4-(4-bromobenzyl)-4-chloro-1,3-diphenyl-1H-pyrazol-5(4H)-one (3e)**

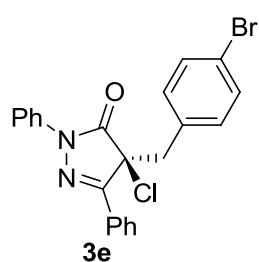

Prepared according to the general procedure with a reaction time of 20 min as yellow oil (82.3 mg, 94% yield) after silica gel chromatography (EtOAc/petroleum ether = 1/20).  $[\alpha]_D^{20} = -57.4$  ( $c$  0.66,  $\text{CH}_2\text{Cl}_2$ );  $^1\text{H}$  NMR (400 MHz,  $\text{CDCl}_3$ )  $\delta$  8.07-8.04 (m, 2H), 7.75 (d,  $J = 8.0$  Hz, 2H), 7.56-7.49 (m, 3H), 7.41-7.37 (m, 2H), 7.25-7.17 (m, 3H), 6.71 (d,  $J = 8.4$  Hz, 2H), 3.70 (d,  $J = 13.2$  Hz, 1H), 3.63 (d,  $J = 13.3$  Hz, 1H);  $^{13}\text{C}$  NMR (101 MHz,  $\text{CDCl}_3$ )  $\delta$  169.3, 154.9, 137.0, 131.7, 131.5, 131.3, 131.0, 129.4, 129.1, 129.0, 126.8, 126.1, 122.4, 119.4, 64.0, 43.3; IR (KBr): 3047, 2912, 1727, 1591, 1489, 1391, 1325, 1135, 1015, 828, 757, 690  $\text{cm}^{-1}$ ; HRMS (ESI)  $m/z$  Calcd. for  $\text{C}_{22}\text{H}_{17}\text{BrClN}_2\text{O}$  ( $[\text{M}+\text{H}]^+$ ) 439.0207, Found 439.0195; Enantiomeric excess was determined to be 91% (determined by HPLC using chiral OD-H column, hexane/2-propanol = 98/2,  $\lambda = 254$  nm, 30  $^\circ\text{C}$ , 0.5 mL/min,  $t_{\text{major}} = 13.2$  min,  $t_{\text{minor}} = 11.3$  min).

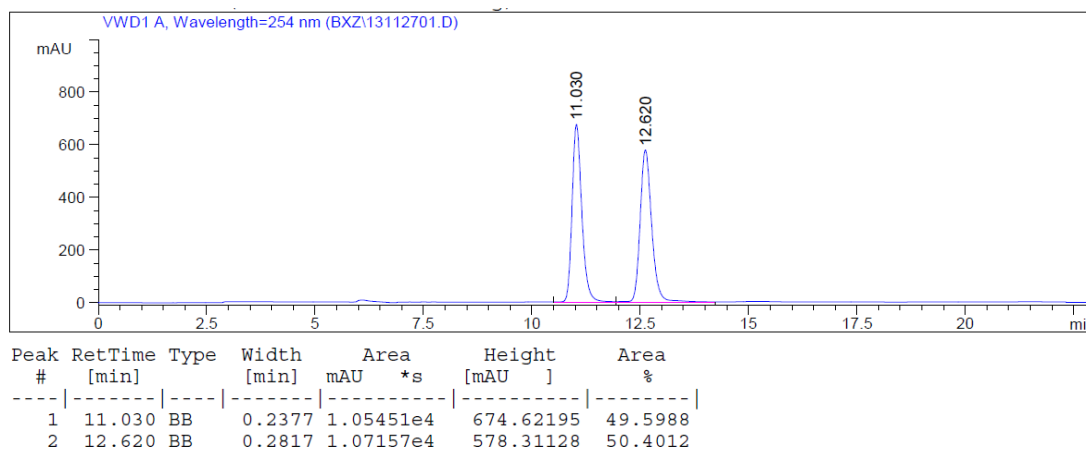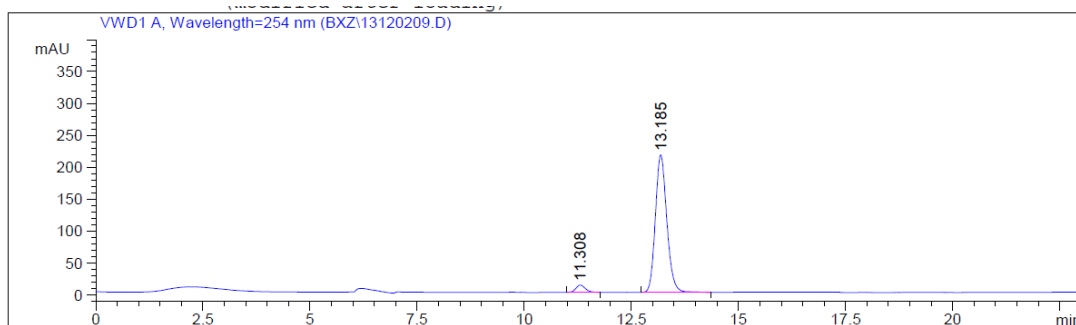



| Peak # | RetTime [min] | Type | Width [min] | Area mAU   | Area *s | Height [mAU] | Area %  |
|--------|---------------|------|-------------|------------|---------|--------------|---------|
| 1      | 11.308        | BB   | 0.2379      | 181.17502  |         | 11.57755     | 4.3335  |
| 2      | 13.185        | BB   | 0.2866      | 3999.63477 |         | 215.28976    | 95.6665 |

**(S)-4-chloro-4-(2-chlorobenzyl)-1,3-diphenyl-1H-pyrazol-5(4H)-one (3f)**

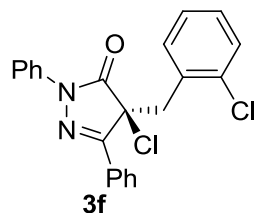

Prepared according to the general procedure with a reaction time of 20 min as red oil (74.9 mg, 95% yield) after silica gel chromatography (EtOAc/petroleum ether = 1/20).  $[\alpha]_D^{21} = -83.6$  ( $c$  0.58,  $\text{CH}_2\text{Cl}_2$ );  $^1\text{H}$  NMR (400 MHz,  $\text{CDCl}_3$ )  $\delta$  8.00 (d,  $J = 7.8$  Hz, 2H), 7.86 (d,  $J = 8.4$  Hz, 2H), 7.49-7.35 (m, 5H), 7.24-7.20 (m, 2H), 7.16-7.05 (m, 3H), 3.91 (d,  $J = 14.2$  Hz, 1H), 3.86 (d,  $J = 14.3$  Hz, 1H);  $^{13}\text{C}$  NMR (101 MHz,  $\text{CDCl}_3$ )  $\delta$  169.4, 155.6, 137.3, 135.0, 131.6, 131.1, 130.4, 129.8, 129.4, 129.0, 128.7, 127.2, 126.8, 126.0, 119.4, 64.6, 40.1; IR (KBr): 3062, 2920, 1728, 1596, 1497, 1390, 1328, 1129, 756, 689  $\text{cm}^{-1}$ ; HRMS (ESI)  $m/z$  Calcd. for  $\text{C}_{22}\text{H}_{17}\text{Cl}_2\text{N}_2\text{O}$  ( $[\text{M}+\text{H}]^+$ ) 395.0712, Found 395.0697; Enantiomeric excess was determined to be 90% (determined by HPLC using chiral OD-H column, hexane/2-propanol = 98/2,  $\lambda = 254$  nm, 30  $^\circ\text{C}$ , 0.5 mL/min,  $t_{\text{major}} = 20.1$  min,  $t_{\text{minor}} = 15.4$  min).

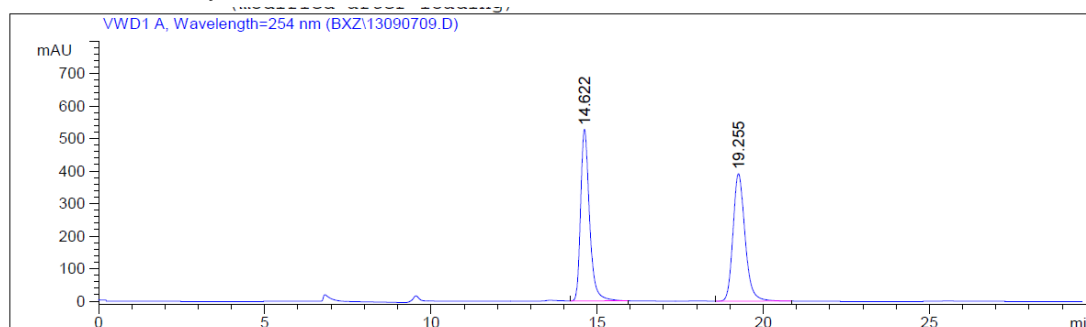

| Peak # | RetTime [min] | Type | Width [min] | Area mAU   | Area *s | Height [mAU] | Area %  |
|--------|---------------|------|-------------|------------|---------|--------------|---------|
| 1      | 14.622        | VB   | 0.2866      | 9862.20117 |         | 527.39868    | 50.0266 |
| 2      | 19.255        | VB   | 0.3866      | 9851.70117 |         | 391.72577    | 49.9734 |

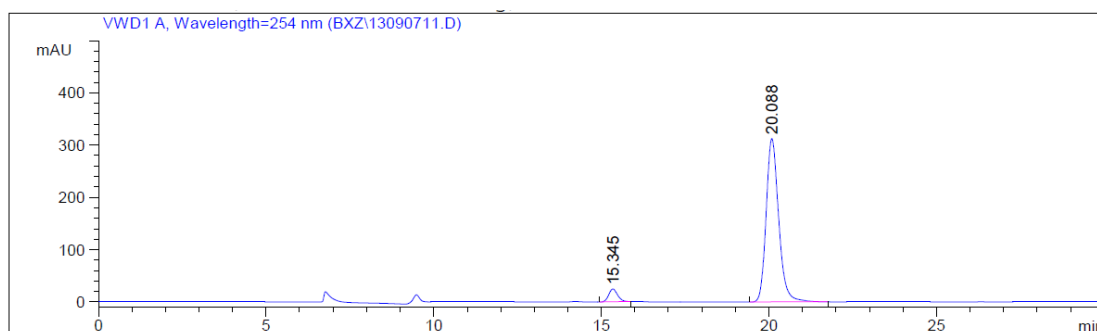

| Peak # | RetTime [min] | Type | Width [min] | Area mAU   | Area *s | Height [mAU] | Area %  |
|--------|---------------|------|-------------|------------|---------|--------------|---------|
| 1      | 15.345        | PB   | 0.2781      | 444.45517  |         | 24.38876     | 5.1913  |
| 2      | 20.088        | BB   | 0.3961      | 8117.08740 |         | 312.62854    | 94.8087 |

**(S)-4-chloro-1,3-diphenyl-4-(4-(trifluoromethyl)benzyl)-1H-pyrazol-5(4H)-one (3g)**

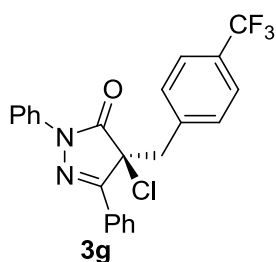

Prepared according to the general procedure with a reaction time of 20 min as colorless oil (79.6 mg, 93% yield) after silica gel chromatography (EtOAc/petroleum ether = 1/20).  $[\alpha]_D^{19} = -68.3$  ( $c$  0.67,  $\text{CH}_2\text{Cl}_2$ );  $^1\text{H}$  NMR (400 MHz,  $\text{CDCl}_3$ )  $\delta$  8.08-8.05 (m, 2H), 7.72 (d,  $J = 7.8$  Hz, 2H), 7.51-7.56 (m, 3H), 7.41-7.37 (m, 2H), 7.32 (d,  $J = 8.1$  Hz, 2H), 7.25-7.21 (m, 1H), 6.97 (d,  $J = 8.1$  Hz, 2H), 3.80 (d,  $J = 13.1$  Hz, 1H), 3.74 (d,  $J =$

13.1 Hz, 1H);  $^{13}\text{C}$  NMR (101 MHz,  $\text{CDCl}_3$ )  $\delta$  169.2, 154.8, 136.9, 136.0, 131.3, 130.3 (q,  $J = 32.3$  Hz), 130.2, 129.4, 129.2, 129.0, 126.8, 126.2, 125.41 (q,  $J = 4.0$  Hz), 123.8 (q,  $J = 272.7$  Hz), 119.5, 64.0, 43.5;  $^{19}\text{F}$  NMR (376 MHz,  $\text{CDCl}_3$ )  $\delta$  -62.70 (3F, s); IR (KBr): 3054, 2912, 1728, 1598, 1497, 1392, 1168, 1127, 1069, 844, 754, 689  $\text{cm}^{-1}$ ; HRMS (ESI)  $m/z$  Calcd. for  $\text{C}_{23}\text{H}_{17}\text{ClF}_3\text{N}_2\text{O}$  ( $[\text{M}+\text{H}]^+$ ) 429.0976, Found 429.0966; Enantiomeric excess was determined to be 90% (determined by HPLC using chiral OD-H column, hexane/2-propanol = 98/2,  $\lambda = 254$  nm, 30  $^\circ\text{C}$ , 0.5 mL/min,  $t_{\text{major}} = 12.0$  min,  $t_{\text{minor}} = 10.8$  min).

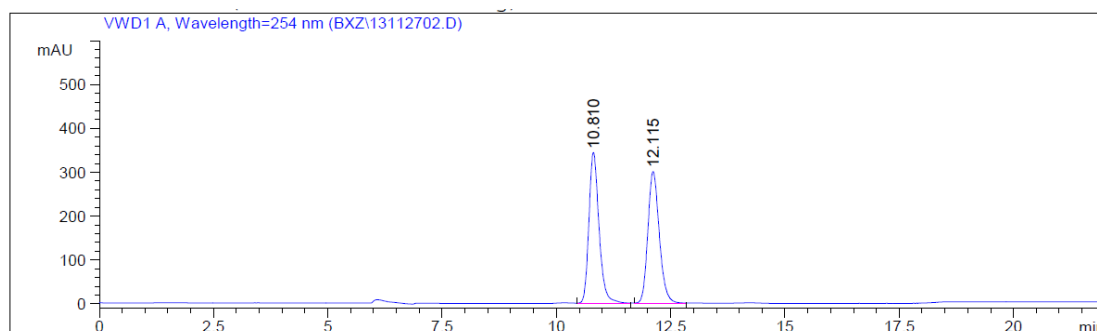

| Peak # | RetTime [min] | Type | Width [min] | Area mAU   | *s | Height [mAU] | Area %  |
|--------|---------------|------|-------------|------------|----|--------------|---------|
| 1      | 10.810        | VB   | 0.2354      | 5304.68311 |    | 343.73264    | 50.2787 |
| 2      | 12.115        | BB   | 0.2693      | 5245.88281 |    | 300.26733    | 49.7213 |

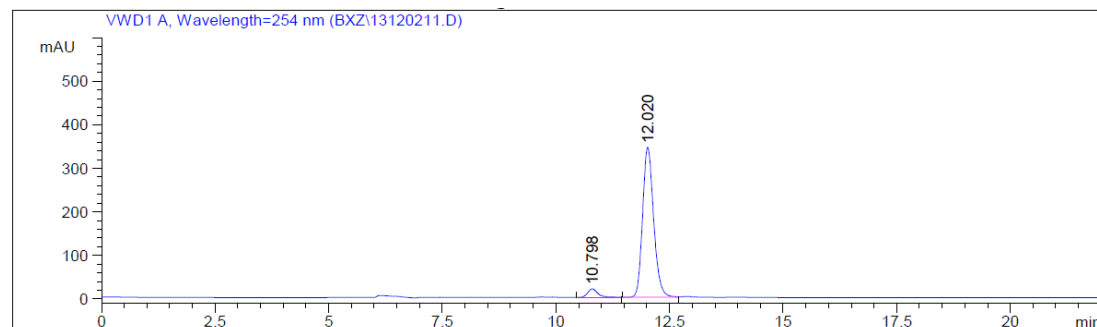

| Peak # | RetTime [min] | Type | Width [min] | Area mAU   | *s | Height [mAU] | Area %  |
|--------|---------------|------|-------------|------------|----|--------------|---------|
| 1      | 10.798        | BB   | 0.2369      | 298.77847  |    | 19.20210     | 4.8782  |
| 2      | 12.020        | BB   | 0.2585      | 5826.05225 |    | 344.39304    | 95.1218 |

### (S)-4-chloro-1,3-diphenyl-4-(thiophen-2-ylmethyl)-1H-pyrazol-5(4H)-one (3h)

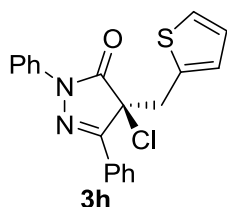

Prepared according to the general procedure with a reaction time of 20 min as yellow oil (69.5 mg, 95% yield) after silica gel chromatography (EtOAc/petroleum ether = 1/20).  $[\alpha]_{\text{D}}^{18} = -142.1$  (c 0.56,  $\text{CH}_2\text{Cl}_2$ );  $^1\text{H}$  NMR (400 MHz,  $\text{CDCl}_3$ )  $\delta$  8.10-8.07 (m, 2H), 7.87-7.85 (m, 2H), 7.55-7.51 (m, 3H), 7.44-7.40 (m, 2H), 7.26-7.22 (m, 1H), 7.03-7.01 (m, 1H), 6.75-6.73 (m, 1H), 6.60 (d,  $J = 2.9$  Hz, 1H), 4.01 (d,  $J = 14.4$  Hz, 1H), 3.93 (d,  $J = 14.4$  Hz, 1H);  $^{13}\text{C}$  NMR (101 MHz,  $\text{CDCl}_3$ )  $\delta$  169.4, 155.2, 137.3, 133.0, 131.2, 129.3, 129.0, 128.2, 127.0, 126.8, 126.0, 125.9, 119.4, 63.4, 37.9; IR (KBr): 2912, 1727, 1597, 1498, 1393, 1327, 1131, 756, 689  $\text{cm}^{-1}$ ; HRMS (ESI)  $m/z$  Calcd. for  $\text{C}_{20}\text{H}_{16}\text{ClN}_2\text{OS}$  ( $[\text{M}+\text{H}]^+$ ) 367.0666, Found 367.0675; Enantiomeric excess was determined to be 92% (determined by HPLC using chiral AD-H column, hexane/2-propanol = 98/2,  $\lambda = 254$  nm, 30  $^\circ\text{C}$ , 0.8 mL/min,  $t_{\text{major}} = 9.2$  min,  $t_{\text{minor}} = 13.9$  min).

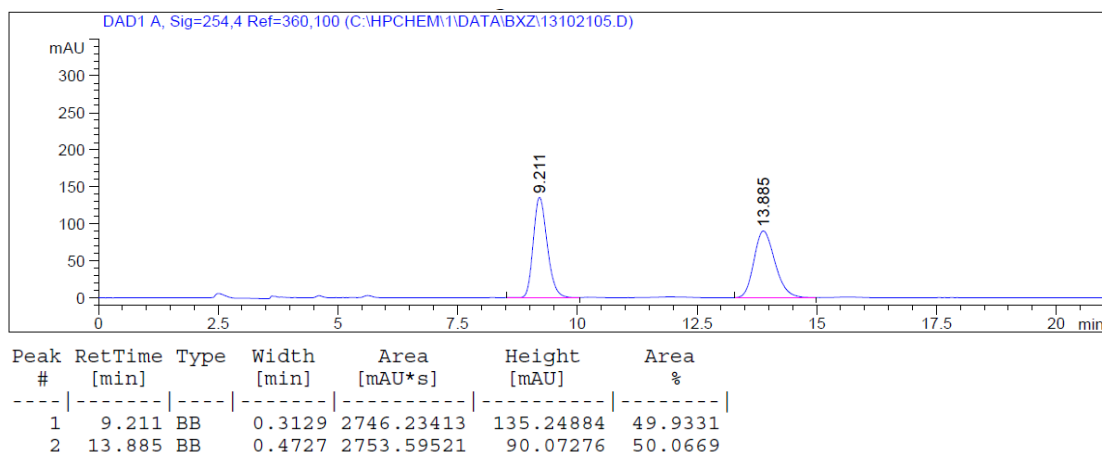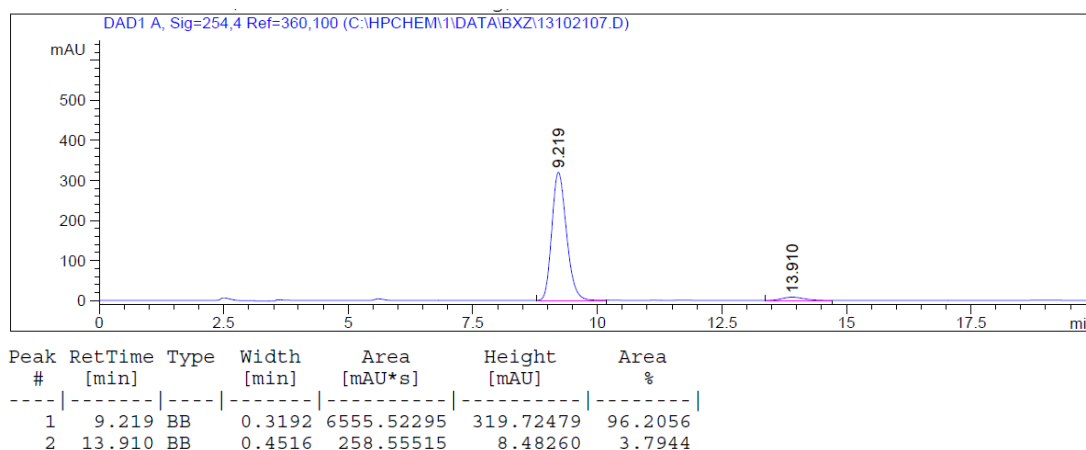

**(S)-4-chloro-4-(furan-2-ylmethyl)-1,3-diphenyl-1H-pyrazol-5(4H)-one (3i)**

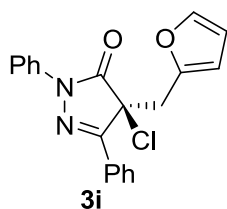

Prepared according to the general procedure with a reaction time of 30 min as yellow oil (63.7 mg, 91% yield) after silica gel chromatography (EtOAc/petroleum ether = 1/20).  $[\alpha]_D^{21} = -98.3$  ( $c$  0.43,  $\text{CH}_2\text{Cl}_2$ );  $^1\text{H}$  NMR (400 MHz,  $\text{CDCl}_3$ )  $\delta$  8.03-8.00 (m, 2H), 7.88-7.85 (m, 2H), 7.51-7.40 (m, 5H), 7.25-7.21 (m, 1H), 7.07 (m, 1H), 6.09-6.08 (m, 1H), 5.89 (d,  $J = 3.2$  Hz, 1H), 3.83 (d,  $J = 14.7$  Hz, 1H), 3.75 (d,  $J = 14.7$  Hz, 1H);  $^{13}\text{C}$  NMR (101 MHz,  $\text{CDCl}_3$ )  $\delta$  169.3, 155.6, 146.6, 142.7, 137.4, 131.0, 129.3, 129.0, 128.9, 126.8, 126.0, 119.4, 110.5, 109.3, 62.5, 36.9; IR (KBr): 2912, 1728, 1597, 1500, 1394, 1328, 1131, 753, 688  $\text{cm}^{-1}$ ; HRMS (ESI)  $m/z$  Calcd. for  $\text{C}_{20}\text{H}_{16}\text{ClN}_2\text{O}_2$  ( $[\text{M}+\text{H}]^+$ ) 351.0895, Found 351.0900; Enantiomeric excess was determined to be 93% (determined by HPLC using chiral OJ-H column, hexane/2-propanol = 95/5,  $\lambda = 254$  nm, 30  $^\circ\text{C}$ , 0.8 mL/min,  $t_{\text{major}} = 35.9$  min,  $t_{\text{minor}} = 16.7$  min).

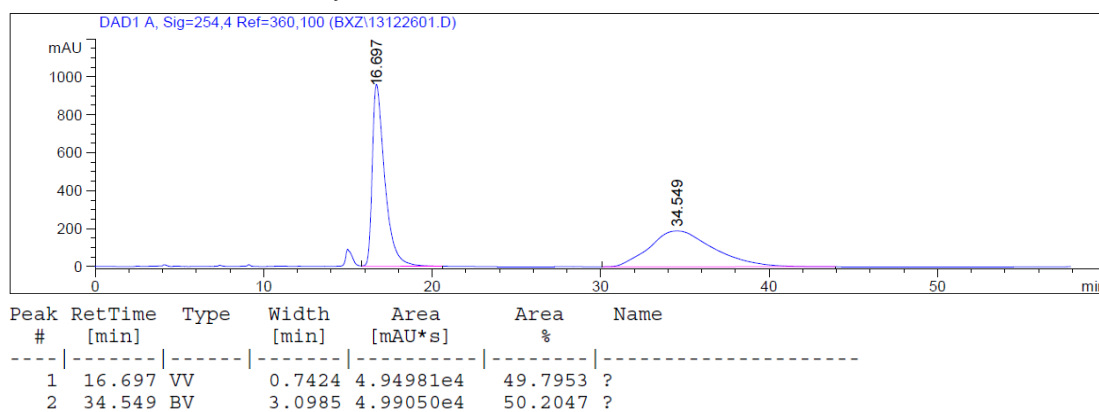

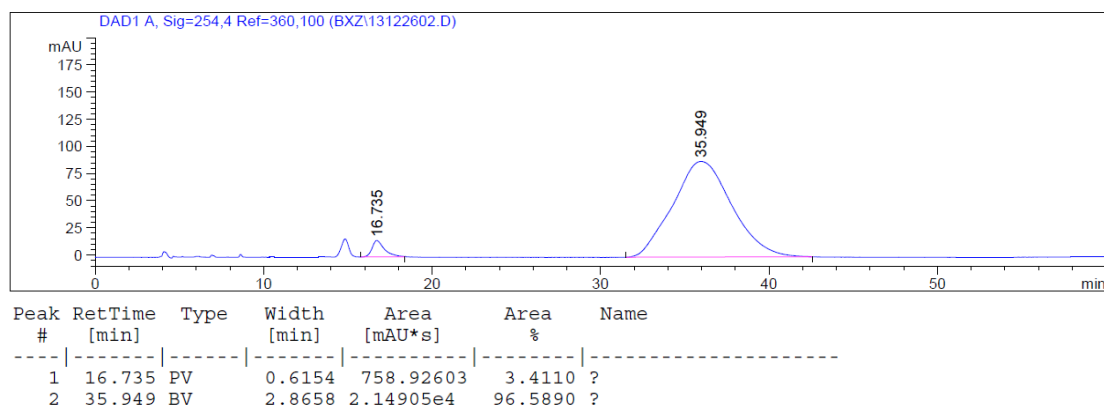

**(S)-4-chloro-4-(naphthalen-1-ylmethyl)-1,3-diphenyl-1H-pyrazol-5(4H)-one (3j)**

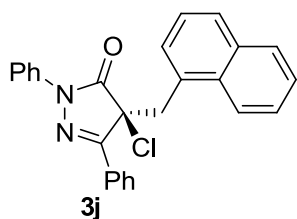

Prepared according to the general procedure with a reaction time of 20 min as orange oil (75.4 mg, 92% yield) after silica gel chromatography (EtOAc/petroleum ether = 1/20).  $[\alpha]_D^{17} = -61.1$  ( $c$  0.62,  $\text{CH}_2\text{Cl}_2$ );  $^1\text{H}$  NMR (400 MHz,  $\text{CDCl}_3$ )  $\delta$  7.97-7.95 (m, 2H), 7.82 (d,  $J = 8.7$  Hz, 1H), 7.67-7.62 (m, 4H), 7.50-7.39 (m, 3H), 7.34-7.27 (m, 3H), 7.22-7.11 (m, 4H), 4.26 (d,  $J = 14.1$  Hz, 1H), 4.13 (d,  $J = 14.1$  Hz, 1H);  $^{13}\text{C}$  NMR (101 MHz,  $\text{CDCl}_3$ )  $\delta$  169.9, 155.6, 137.1, 133.8, 131.6, 131.1, 129.1, 129.0, 128.7, 128.6, 128.5, 127.1, 126.1, 125.9, 125.7, 124.9, 123.8, 119.6, 65.2, 39.8; IR (KBr): 3062, 2920, 1726, 1596, 1493, 1391, 1327, 1067, 780, 756, 689  $\text{cm}^{-1}$ ; HRMS  $m/z$  (ESI) Calcd. for  $\text{C}_{26}\text{H}_{20}\text{ClN}_2\text{O}$  ( $[\text{M}+\text{H}]^+$ ) 411.1259, Found 411.1252; Enantiomeric excess was determined to be 95% (determined by HPLC using chiral OD-H column, hexane/2-propanol = 98/2,  $\lambda = 254$  nm, 30  $^\circ\text{C}$ , 0.5 mL/min,  $t_{\text{major}} = 28.5$  min,  $t_{\text{minor}} = 18.9$  min).

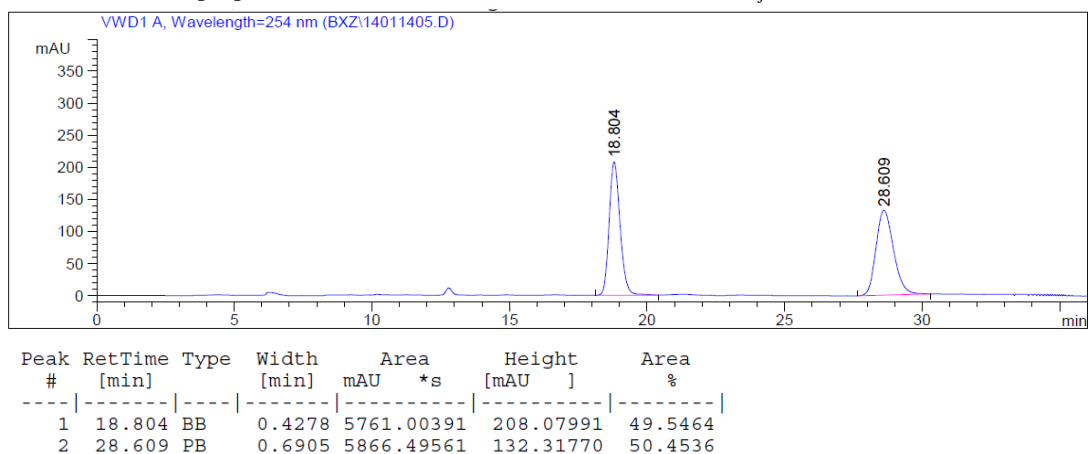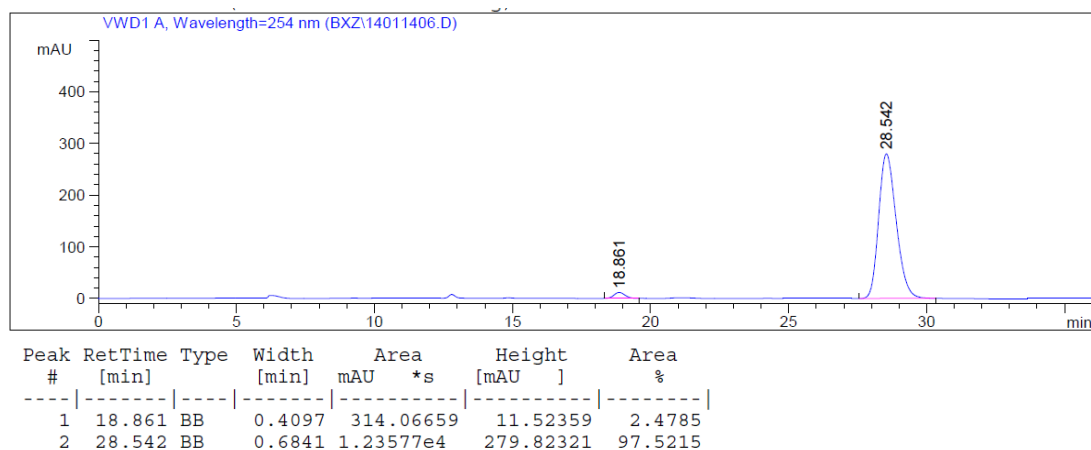

**(S)-4-allyl-4-chloro-1,3-diphenyl-1H-pyrazol-5(4H)-one (3k)**

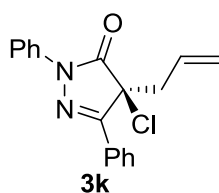

Prepared according to the general procedure with a reaction time of 20 min as yellow oil (57.0 mg, 92% yield) after silica gel chromatography (EtOAc/petroleum ether = 1/20).  $[\alpha]_D^{17} = -83.1$  ( $c$  0.53,  $\text{CH}_2\text{Cl}_2$ );  $^1\text{H}$  NMR (400 MHz,  $\text{CDCl}_3$ )  $\delta$  8.09-8.06 (m, 2H), 7.98 (d,  $J$  = 8.0 Hz, 2H), 7.50-7.43 (m, 5H), 7.25 (t,  $J$  = 7.4 Hz, 1H), 5.44-5.34 (m, 1H), 5.09-5.04 (m, 2H), 3.21-3.10 (m, 2H);  $^{13}\text{C}$  NMR (101 MHz,  $\text{CDCl}_3$ )  $\delta$  169.6, 155.4, 137.5, 131.2, 129.2, 129.1, 128.3, 126.8, 126.0, 122.7, 119.2, 63.5, 42.2; IR (KBr): 2920, 2852, 1729, 1597, 1498, 1390, 1325, 1127, 755, 690, 646  $\text{cm}^{-1}$ ; HRMS (ESI)  $m/z$  Calcd. for  $\text{C}_{18}\text{H}_{16}\text{ClN}_2\text{O}$  ( $[\text{M}+\text{H}]^+$ ) 311.0946, Found 311.0953; Enantiomeric excess was determined to be 88% (determined by HPLC using chiral AD-H column, hexane/2-propanol = 98/2,  $\lambda$  = 254 nm, 30  $^\circ\text{C}$ , 0.8 mL/min,  $t_{\text{major}}$  = 5.6 min,  $t_{\text{minor}}$  = 8.4 min).

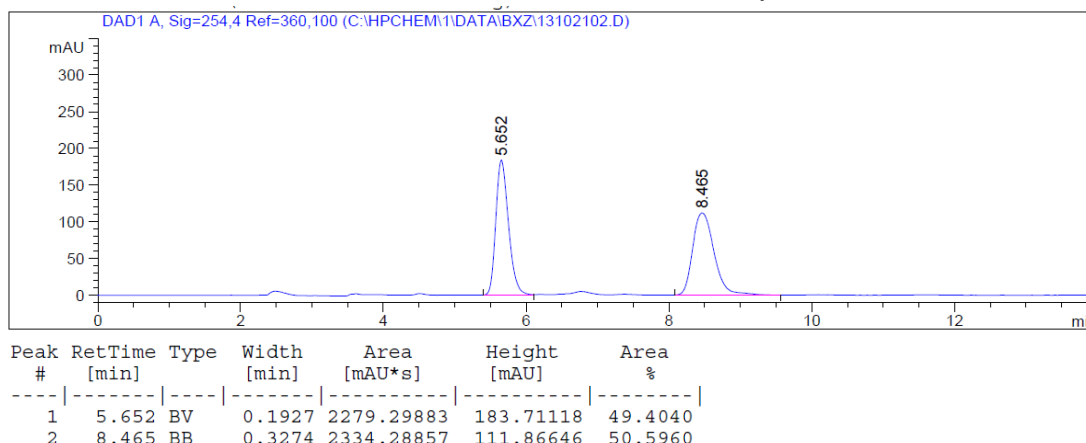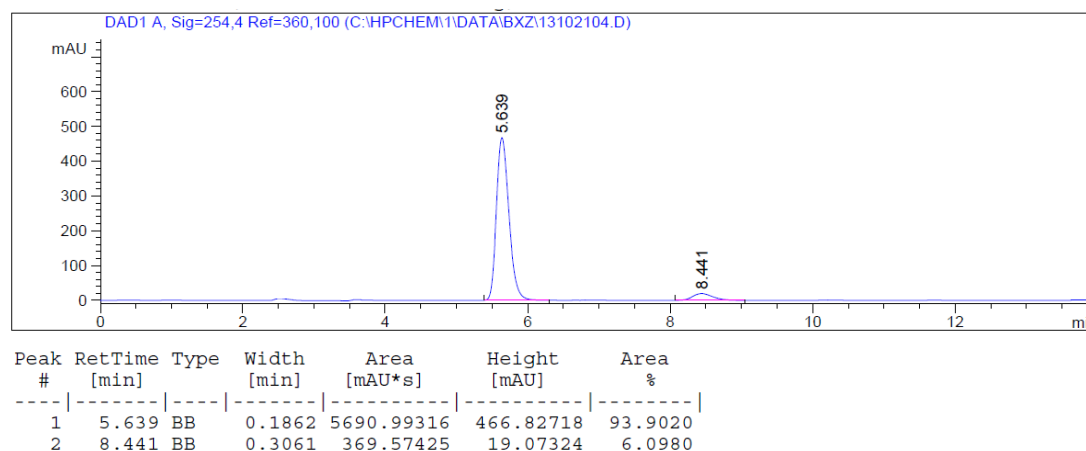

**(S)-4-chloro-1,3-diphenyl-4-(prop-2-ynyl)-1H-pyrazol-5(4H)-one (3l)**

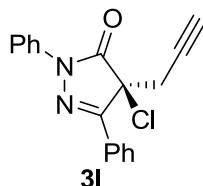

Prepared according to the general procedure with a reaction time of 20 min as yellow oil (54.8 mg, 89% yield) after silica gel chromatography (EtOAc/petroleum ether = 1/20).  $[\alpha]_D^{20} = -98.9$  ( $c$  0.31,  $\text{CH}_2\text{Cl}_2$ );  $^1\text{H}$  NMR (400 MHz,  $\text{CDCl}_3$ )  $\delta$  8.05-8.00 (m, 4H), 7.53-7.44 (m, 5H), 7.26 (dd,  $J$  = 12.1, 4.6 Hz, 1H), 3.34 (dd,  $J$  = 16.4, 2.6 Hz, 1H), 3.22 (dd,  $J$  = 16.4, 2.6 Hz, 1H), 1.94 (t,  $J$  = 2.6 Hz, 1H);  $^{13}\text{C}$  NMR (101 MHz,  $\text{CDCl}_3$ )  $\delta$  168.7, 154.8, 137.4, 131.2, 129.1, 129.0, 128.8, 126.8, 126.0, 119.2, 75.0, 72.9, 62.1, 28.2; IR (KBr): 3295, 2912, 1728, 1597, 1493, 1392, 1326, 1135, 756, 689, 644  $\text{cm}^{-1}$ ; HRMS (ESI)  $m/z$  Calcd. for  $\text{C}_{18}\text{H}_{14}\text{ClN}_2\text{O}$  ( $[\text{M}+\text{H}]^+$ ) 309.0789, Found 309.0779; Enantiomeric excess was determined to be 92% (determined by HPLC using chiral OD-H column, hexane/2-propanol = 98/2,  $\lambda$  = 254 nm, 30  $^\circ\text{C}$ , 0.5 mL/min,  $t_{\text{major}}$  = 19.2 min,  $t_{\text{minor}}$  = 18.0 min).

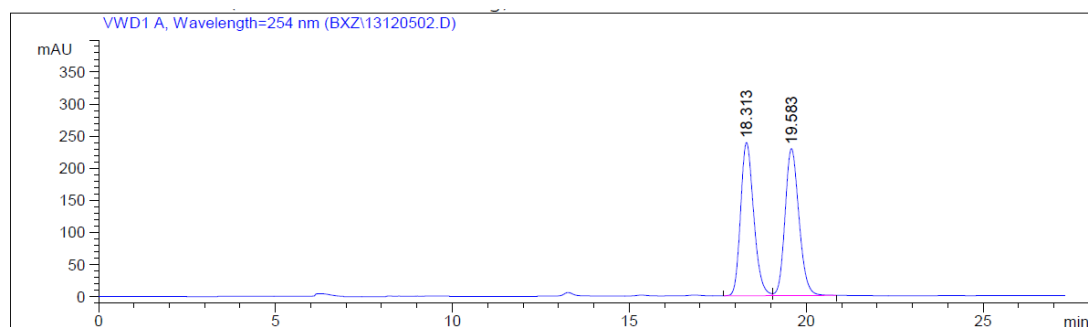

| Peak # | RetTime [min] | Type | Width [min] | Area mAU   | Area %  |
|--------|---------------|------|-------------|------------|---------|
| 1      | 18.313        | BV   | 0.3968      | 6158.51367 | 49.5592 |
| 2      | 19.583        | VB   | 0.4223      | 6268.07373 | 50.4408 |

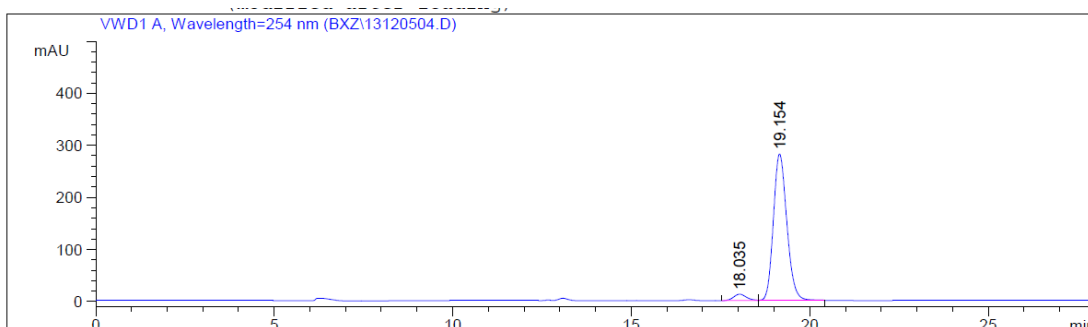

| Peak # | RetTime [min] | Type | Width [min] | Area mAU   | Area %  |
|--------|---------------|------|-------------|------------|---------|
| 1      | 18.035        | BV   | 0.3868      | 297.71979  | 3.8901  |
| 2      | 19.154        | VB   | 0.4041      | 7355.51904 | 96.1099 |

**(S)-4-chloro-1,3-diphenyl-4-propyl-1H-pyrazol-5(4H)-one (3m)**

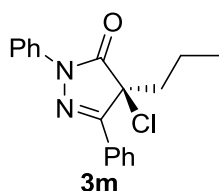

Prepared according to the general procedure with a reaction time of 20 min as yellow oil (58.0 mg, 93% yield) after silica gel chromatography (EtOAc/petroleum ether = 1/20).  $[\alpha]_D^{25} = -56.6$  ( $c$  0.44,  $\text{CH}_2\text{Cl}_2$ );  $^1\text{H}$  NMR (400 MHz,  $\text{CDCl}_3$ )  $\delta$  8.09-8.01 (m, 4H), 7.50-7.43 (m, 5H), 7.27-7.23 (m, 1H), 2.47-2.32 (m, 2H), 1.18-1.10 (m, 2H), 0.83 (t,  $J = 7.3$  Hz, 3H);  $^{13}\text{C}$  NMR (101 MHz,  $\text{CDCl}_3$ )  $\delta$  167.0, 155.9, 137.5, 131.2, 129.1, 129.0, 126.7, 125.8, 119.0, 64.3, 40.2, 17.8, 13.7; IR (KBr): 2957, 2927, 2867, 1730, 1597, 1498, 1390, 1323, 1130, 756, 689, 644  $\text{cm}^{-1}$ ; HRMS (ESI)  $m/z$  Calcd. for  $\text{C}_{18}\text{H}_{18}\text{ClN}_2\text{O}$  ( $[\text{M}+\text{H}]^+$ ) 313.1102, Found 313.1109; Enantiomeric excess was determined to be 68% (determined by HPLC using chiral OD-H column, hexane/2-propanol = 98/2,  $\lambda = 254$  nm, 30  $^\circ\text{C}$ , 0.5 mL/min,  $t_{\text{major}} = 11.5$  min,  $t_{\text{minor}} = 10.7$  min).

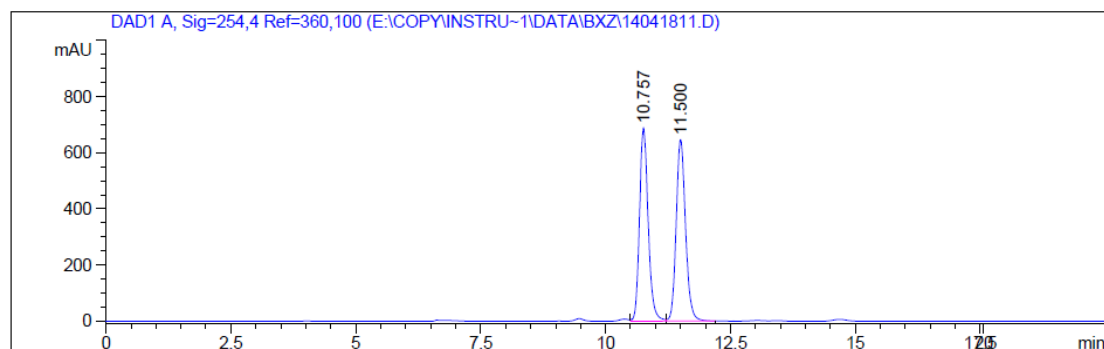

| Peak # | RetTime [min] | Type | Width [min] | Area [mAU*s] | Height [mAU] | Area %  |
|--------|---------------|------|-------------|--------------|--------------|---------|
| 1      | 10.757        | VV   | 0.1849      | 8334.56152   | 689.89709    | 49.7901 |
| 2      | 11.500        | VB   | 0.1996      | 8404.83008   | 646.67889    | 50.2099 |

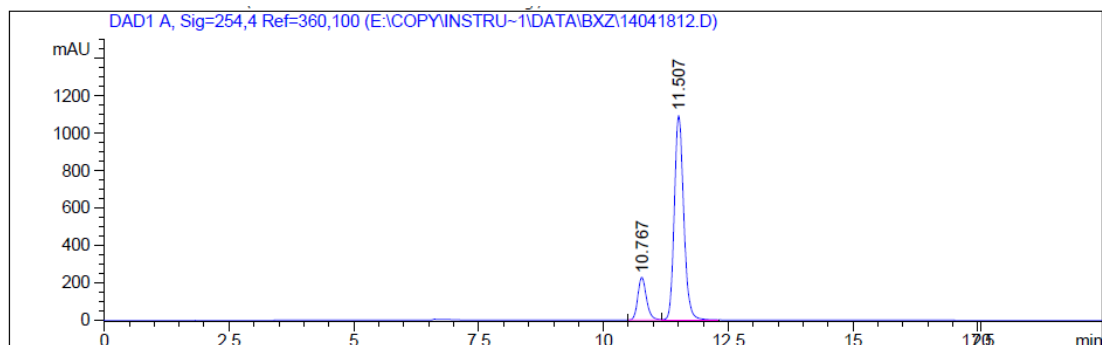

| Peak # | RetTime [min] | Type | Width [min] | Area [mAU*s] | Height [mAU] | Area %  |
|--------|---------------|------|-------------|--------------|--------------|---------|
| 1      | 10.767        | BV   | 0.1849      | 2757.83521   | 228.30801    | 16.1244 |
| 2      | 11.507        | VB   | 0.2029      | 1.43457e4    | 1094.76465   | 83.8756 |

**(S)-4-benzyl-4-chloro-3-(4-methoxyphenyl)-1-phenyl-1H-pyrazol-5(4H)-one (3n)**

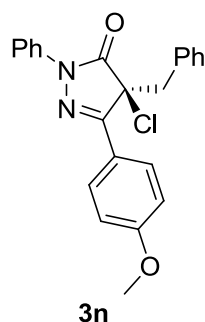

Prepared according to the general procedure with a reaction time of 20 min as yellow oil (69.4 mg, 89% yield) after silica gel chromatography (EtOAc/petroleum ether = 1/15).  $[\alpha]_D^{21} = -44.7$  (c 0.65,  $\text{CH}_2\text{Cl}_2$ );  $^1\text{H}$  NMR (400 MHz,  $\text{CDCl}_3$ )  $\delta$  8.02 (d,  $J = 8.9$  Hz, 2H), 7.72 (d,  $J = 7.9$  Hz, 2H), 7.35 (t,  $J = 7.9$  Hz, 2H), 7.18 (t,  $J = 7.4$  Hz, 1H), 7.10-7.01 (m, 5H), 6.87 (d,  $J = 7.0$  Hz, 2H), 3.90 (s, 3H), 3.74 (d,  $J = 13.1$  Hz, 1H), 3.66 (d,  $J = 13.1$  Hz, 1H);  $^{13}\text{C}$  NMR (101 MHz,  $\text{CDCl}_3$ )  $\delta$  169.4, 161.8, 154.9, 137.2, 132.0, 129.8, 128.9, 128.5, 128.4, 128.0, 125.8, 122.2, 119.5, 114.4, 64.6, 55.5, 44.2; IR (KBr): 2935, 1724, 1606, 1516, 1499, 1393, 1326, 1259, 1177, 1132, 1027, 837, 753, 700, 601, 582, 556  $\text{cm}^{-1}$ ; HRMS (ESI)  $m/z$  Calcd. for  $\text{C}_{23}\text{H}_{20}\text{ClN}_2\text{O}_2$  ( $[\text{M}+\text{H}]^+$ ) 391.1208, Found 391.1193; Enantiomeric excess was determined to be 89% (determined by HPLC using chiral OD-H column, hexane/2-propanol = 98/2,  $\lambda = 254$  nm, 30  $^\circ\text{C}$ , 0.5 mL/min,  $t_{\text{major}} = 19.7$  min,  $t_{\text{minor}} = 17.9$  min).

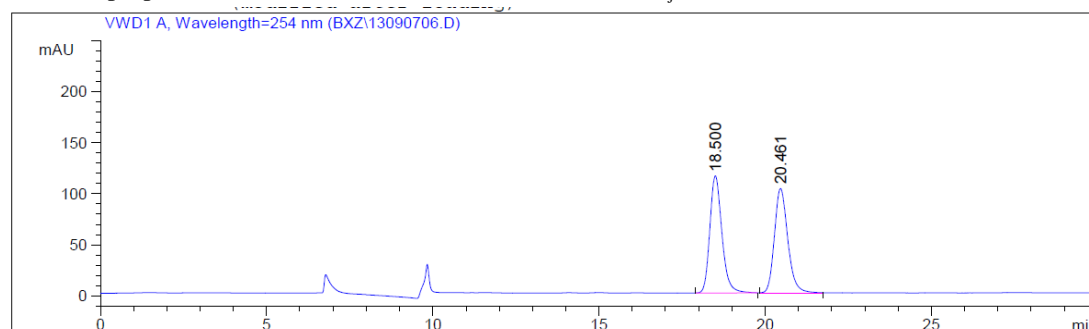

| Peak # | RetTime [min] | Type | Width [min] | Area mAU*s | Height [mAU] | Area %  |
|--------|---------------|------|-------------|------------|--------------|---------|
| 1      | 18.500        | BB   | 0.3904      | 2886.37427 | 114.42172    | 50.4117 |
| 2      | 20.461        | BB   | 0.4314      | 2839.22681 | 101.87477    | 49.5883 |

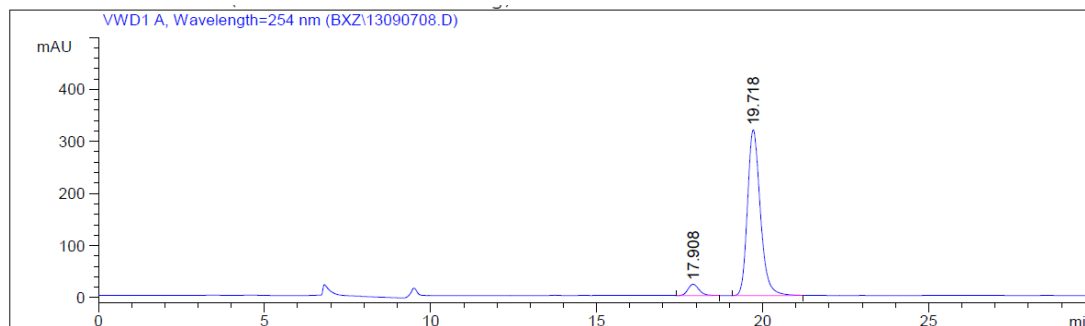

| Peak # | RetTime [min] | Type | Width [min] | Area mAU*s | Height [mAU] | Area %  |
|--------|---------------|------|-------------|------------|--------------|---------|
| 1      | 17.908        | BB   | 0.3604      | 512.56934  | 21.90541     | 5.6564  |
| 2      | 19.718        | BB   | 0.4107      | 8549.11035 | 318.47806    | 94.3436 |

**(S)-4-benzyl-4-chloro-1-phenyl-3-p-tolyl-1H-pyrazol-5(4H)-one (3o)**

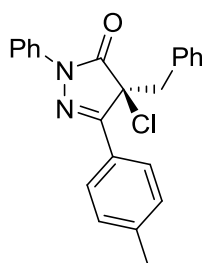

**3o**

Prepared according to the general procedure with a reaction time of 20 min as yellow oil (68.0 mg, 91% yield) after silica gel chromatography (EtOAc/petroleum ether = 1/20).  $[\alpha]_D^{21} = -59.5$  (c 0.58,  $\text{CH}_2\text{Cl}_2$ );  $^1\text{H}$  NMR (400 MHz,  $\text{CDCl}_3$ )  $\delta$  7.96 (d,  $J = 8.3$  Hz, 2H), 7.71-7.72 (m, 2H), 7.37-7.30 (m, 4H), 7.18 (t,  $J = 7.4$  Hz, 1H), 7.10-7.02 (m, 3H), 6.87-6.85 (m, 2H), 3.74 (d,  $J = 13.2$  Hz, 1H), 3.68 (d,  $J = 13.2$  Hz, 1H), 2.45 (s, 3H);  $^{13}\text{C}$  NMR (101 MHz,  $\text{CDCl}_3$ )  $\delta$  169.6, 155.2, 141.5, 137.2, 132.0, 129.8, 128.9, 128.4, 128.0, 126.9, 126.8, 125.9, 119.6, 64.6, 44.2, 21.7; IR (KBr): 3032, 2920, 1726, 1597, 1499, 1391, 1352, 1183, 1131, 820, 755, 727, 700  $\text{cm}^{-1}$ ; HRMS (ESI)  $m/z$  Calcd. for  $\text{C}_{23}\text{H}_{20}\text{ClN}_2\text{O}$  ( $[\text{M}+\text{H}]^+$ ) 375.1259, Found 375.1245; Enantiomeric excess was determined to be 91% (determined by HPLC using chiral AD-H column, hexane/2-propanol = 98/2,  $\lambda = 254$  nm, 30  $^\circ\text{C}$ , 0.5 mL/min,  $t_{\text{major}} = 7.1$  min,  $t_{\text{minor}} = 14.1$  min).

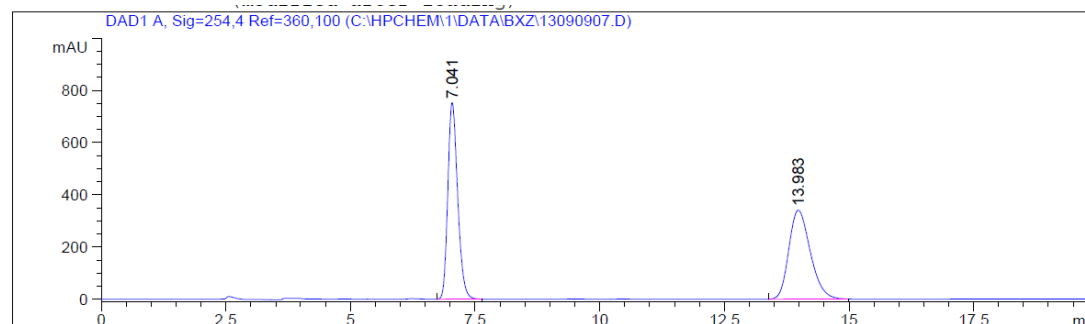

| Peak # | RetTime [min] | Type | Width [min] | Area [mAU*s] | Height [mAU] | Area %  |
|--------|---------------|------|-------------|--------------|--------------|---------|
| 1      | 7.041         | BB   | 0.2120      | 1.03190e4    | 752.33301    | 50.3774 |
| 2      | 13.983        | BB   | 0.4645      | 1.01644e4    | 340.25671    | 49.6226 |

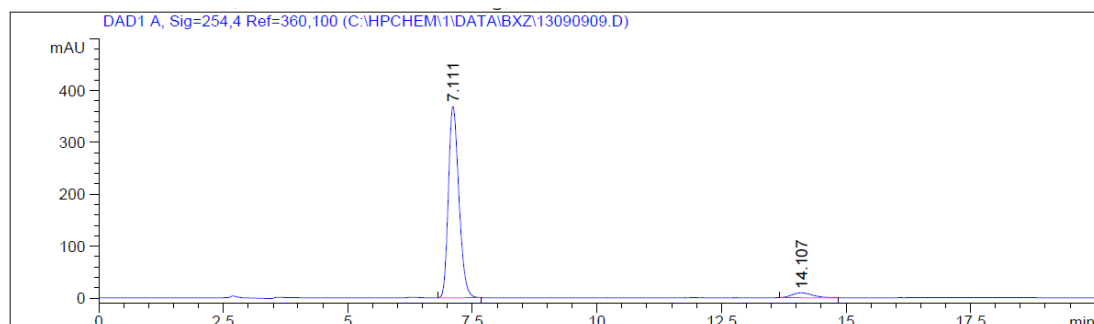



| Peak # | RetTime [min] | Type | Width [min] | Area [mAU*s] | Height [mAU] | Area %  |
|--------|---------------|------|-------------|--------------|--------------|---------|
| 1      | 7.111         | BB   | 0.2250      | 5398.69531   | 368.35184    | 95.3403 |
| 2      | 14.107        | BB   | 0.4120      | 263.85892    | 9.27254      | 4.6597  |

**(S)-4-benzyl-3-(4-bromophenyl)-4-chloro-1-phenyl-1H-pyrazol-5(4H)-one (3p)**

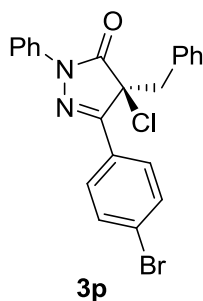

Prepared according to the general procedure with a reaction time of 30 min as yellow solid (83.2 mg, 95% yield) after silica gel chromatography (EtOAc/petroleum ether = 1/20). Mp: 114.7-116.2 °C;  $[\alpha]_D^{21} = -19.8$  (c 0.64, CH<sub>2</sub>Cl<sub>2</sub>); <sup>1</sup>H NMR (400 MHz, CDCl<sub>3</sub>) δ 7.92-7.90 (m, 2H), 7.70-7.62 (m, 4H), 7.36 (dd, *J* = 10.8, 5.1 Hz, 2H), 7.19 (t, *J* = 7.4 Hz, 1H), 7.11-7.03 (m, 3H), 6.84 (d, *J* = 7.1 Hz, 2H), 3.75 (d, *J* = 13.2 Hz, 1H), 3.62 (d, *J* = 13.2 Hz, 1H); <sup>13</sup>C NMR (101 MHz, CDCl<sub>3</sub>) δ 169.4, 154.2, 137.0, 132.3, 131.7, 129.7, 128.9, 128.6, 128.5, 128.2, 126.2, 125.6, 119.6, 64.2, 44.1; IR (KBr): 3035, 2920, 1728, 1597, 1499, 1385, 1323, 1131, 1073, 1010, 829, 755, 727, 700 cm<sup>-1</sup>; HRMS (ESI) *m/z* Calcd. for C<sub>22</sub>H<sub>16</sub>BrClN<sub>2</sub>NaO ([M+Na]<sup>+</sup>) 461.0027, Found 461.0006; Enantiomeric excess was determined to be 84%, 99% after recrystallization by ester/hexane (determined by HPLC using chiral OD-H column, hexane/2-propanol = 98/2, λ = 254 nm, 30 °C, 0.5 mL/min, *t*<sub>major</sub> = 15.0 min, *t*<sub>minor</sub> = 14.0 min).

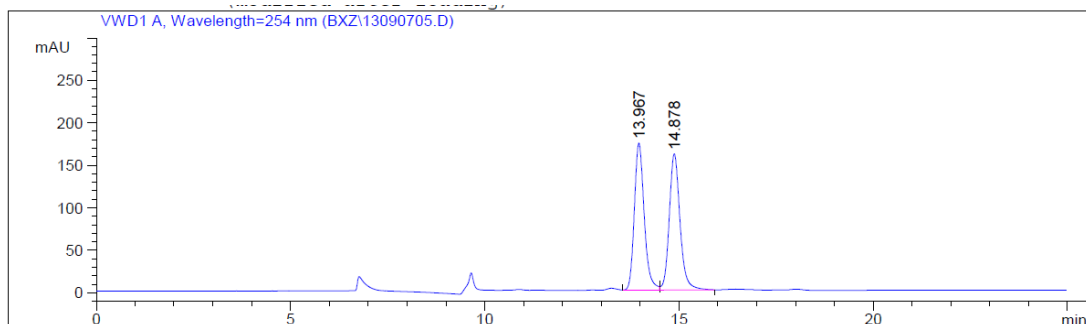

| Peak # | RetTime [min] | Type | Width [min] | Area mAU *s | Height [mAU] | Area %  |
|--------|---------------|------|-------------|-------------|--------------|---------|
| 1      | 13.967        | VV   | 0.2699      | 3054.46045  | 173.09416    | 49.7904 |
| 2      | 14.878        | VB   | 0.2928      | 3080.17236  | 160.13545    | 50.2096 |

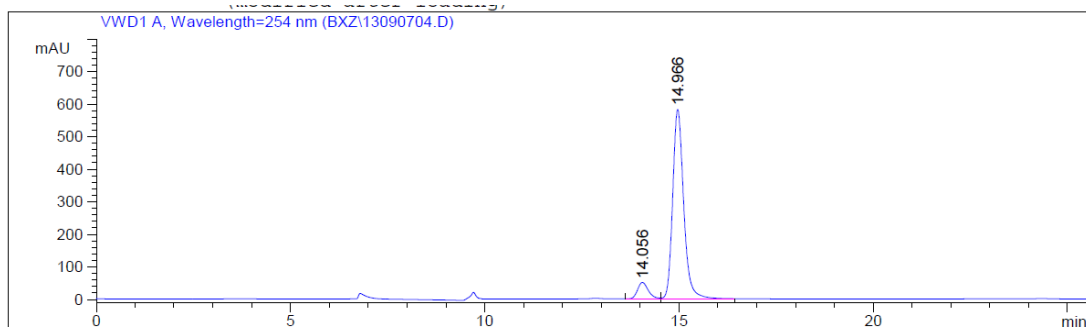

| Peak # | RetTime [min] | Type | Width [min] | Area mAU *s | Height [mAU] | Area %  |
|--------|---------------|------|-------------|-------------|--------------|---------|
| 1      | 14.056        | VV   | 0.2947      | 966.49579   | 50.47221     | 7.8139  |
| 2      | 14.966        | VB   | 0.3017      | 1.14024e4   | 581.12915    | 92.1861 |

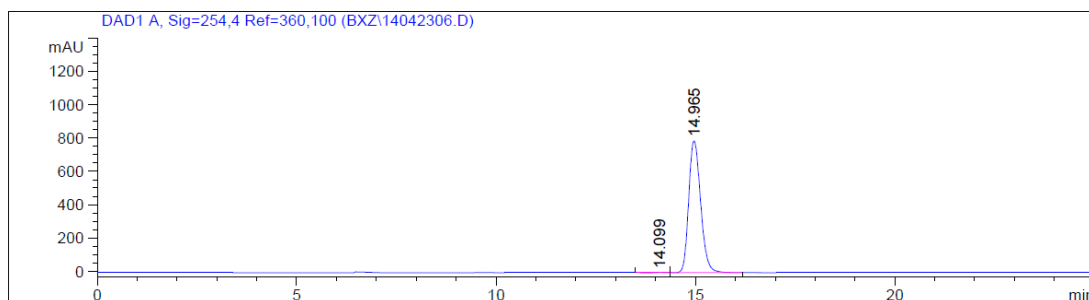

| Peak # | RetTime [min] | Type | Width [min] | Area [mAU*s] | Area %  | Name |
|--------|---------------|------|-------------|--------------|---------|------|
| 1      | 14.099        | BV   | 0.2353      | 34.36007     | 0.2094  | ?    |
| 2      | 14.965        | VV   | 0.3244      | 1.63760e4    | 99.7906 | ?    |

| Peak # | RetTime [min] | Type | Width [min] | Area mAU *s | Height [mAU] | Area %  |
|--------|---------------|------|-------------|-------------|--------------|---------|
| 1      | 15.660        | VB   | 0.3335      | 1.01070e4   | 462.68948    | 81.5969 |
| 2      | 17.293        | BB   | 0.3629      | 2279.49219  | 95.49428     | 18.4031 |

**(S)-4-benzyl-4-chloro-3-methyl-1-phenyl-1H-pyrazol-5(4H)-one (3q)**

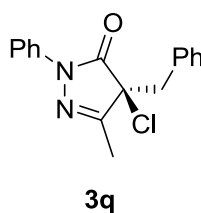

Prepared according to the general procedure with a reaction time of 30 min as colorless oil (54.4 mg, 91% yield) after silica gel chromatography (EtOAc/petroleum ether = 1/20).  $[\alpha]_D^{21} = -117.6$  (c 0.48,  $\text{CH}_2\text{Cl}_2$ );  $^1\text{H}$  NMR (400 MHz,  $\text{CDCl}_3$ )  $\delta$  7.65-7.63 (m, 2H), 7.35-7.31 (m, 2H), 7.25-7.13 (m, 6H), 3.62 (d,  $J = 13.6$  Hz, 1H), 3.28 (d,  $J = 13.6$  Hz, 1H), 2.25 (s, 3H);  $^{13}\text{C}$  NMR (101 MHz,  $\text{CDCl}_3$ )  $\delta$  169.2, 157.8, 137.1, 132.3, 129.4, 128.9, 128.8, 128.2, 125.7, 119.2, 65.7, 42.6, 13.7; IR (KBr): 3032, 2920, 1723, 1596, 1500, 1400, 1367, 1321, 1116, 756, 724, 699  $\text{cm}^{-1}$ ; HRMS (ESI)  $m/z$  Calcd. for  $\text{C}_{17}\text{H}_{16}\text{ClN}_2\text{O}$  ( $[\text{M}+\text{H}]^+$ ) 299.0946, Found 299.0936; Enantiomeric excess was determined to be 74% (determined by HPLC using chiral AD-H column, hexane/2-propanol = 98/2,  $\lambda = 254$  nm, 30  $^\circ\text{C}$ , 0.5 mL/min,  $t_{\text{major}} = 7.1$  min,  $t_{\text{minor}} = 11.2$  min).

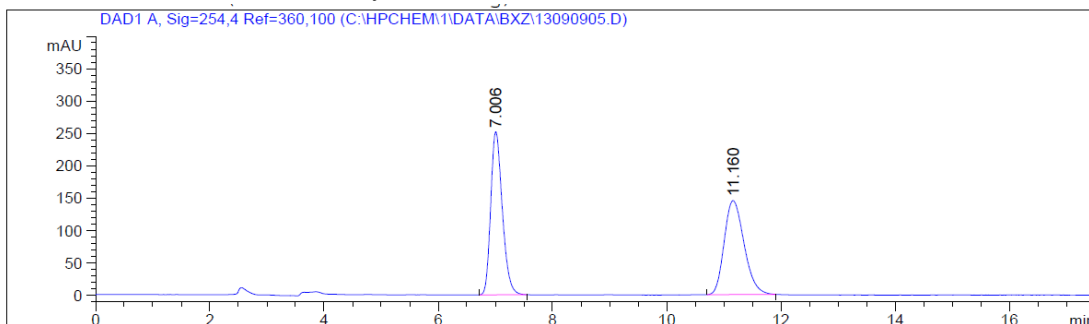

| Peak # | RetTime [min] | Type | Width [min] | Area [mAU*s] | Height [mAU] | Area %  |
|--------|---------------|------|-------------|--------------|--------------|---------|
| 1      | 7.006         | BB   | 0.2162      | 3546.35498   | 251.93922    | 50.2483 |
| 2      | 11.160        | BB   | 0.3802      | 3511.30078   | 145.18736    | 49.7517 |

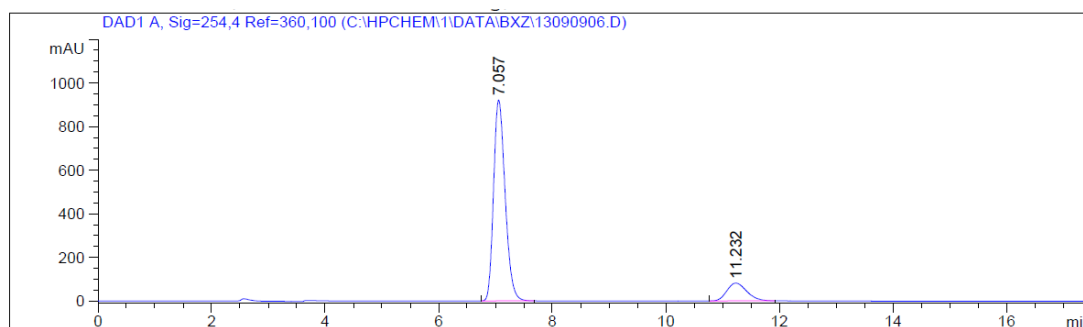

| Peak # | RetTime [min] | Type | Width [min] | Area [mAU*s] | Height [mAU] | Area %  |
|--------|---------------|------|-------------|--------------|--------------|---------|
| 1      | 7.057         | BB   | 0.2188      | 1.30150e4    | 921.39929    | 86.8512 |
| 2      | 11.232        | BB   | 0.3810      | 1970.40698   | 81.22446     | 13.1488 |

**(S)-4-benzyl-4-chloro-1-methyl-3-phenyl-1H-pyrazol-5(4H)-one (3r)**

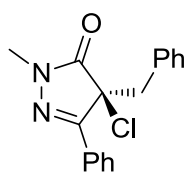

**3r**

Prepared according to the general procedure with a reaction time of 50 min as colorless oil (54.1 mg, 91% yield) after silica gel chromatography (EtOAc/petroleum ether = 1/20).  $[\alpha]_D^{20} = 11.0$  (c 0.41,  $\text{CH}_2\text{Cl}_2$ );  $^1\text{H}$  NMR (400 MHz,  $\text{CDCl}_3$ )  $\delta$  7.97-7.94 (m, 2H), 7.49-7.46 (m, 3H), 7.18-7.01 (m, 3H), 6.81 (d,  $J = 7.5$  Hz, 2H), 3.62 (s, 2H), 3.18 (s, 3H);  $^{13}\text{C}$  NMR (101 MHz,  $\text{CDCl}_3$ )  $\delta$  171.1, 154.6, 132.1, 130.7, 129.8, 129.0, 128.3, 127.9, 126.4, 63.3, 43.7, 31.6; IR (KBr): 3032, 2920, 1726, 1598, 1392, 1239, 1017, 760, 728, 698  $\text{cm}^{-1}$ ; HRMS (ESI)  $m/z$  Calcd.

for  $\text{C}_{17}\text{H}_{16}\text{ClN}_2\text{O}$  ( $[\text{M}+\text{H}]^+$ ) 299.0946, Found 299.0935; Enantiomeric excess was determined to be 63% (determined by HPLC using chiral OD-H column, hexane/2-propanol = 98/2,  $\lambda = 254$  nm, 30 °C, 0.5 mL/min,  $t_{\text{major}} = 15.7$  min,  $t_{\text{minor}} = 17.3$  min).

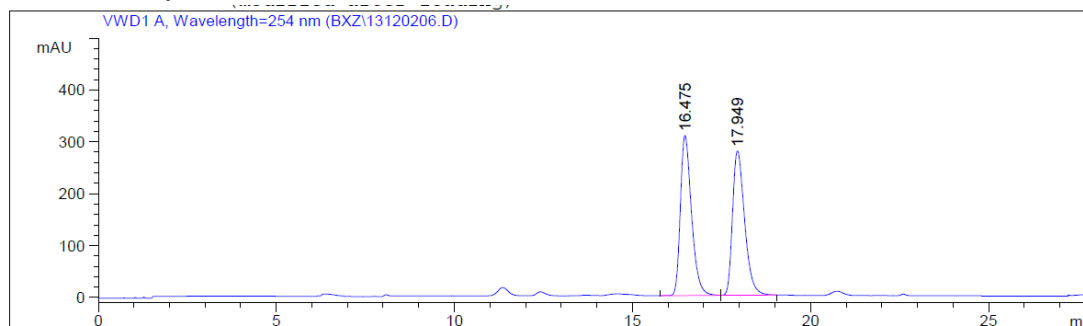

| Peak # | RetTime [min] | Type | Width [min] | Area mAU *s | Height [mAU] | Area %  |
|--------|---------------|------|-------------|-------------|--------------|---------|
| 1      | 16.475        | BV   | 0.3327      | 6714.25439  | 308.32950    | 50.6239 |
| 2      | 17.949        | VB   | 0.3635      | 6548.75830  | 278.12384    | 49.3761 |

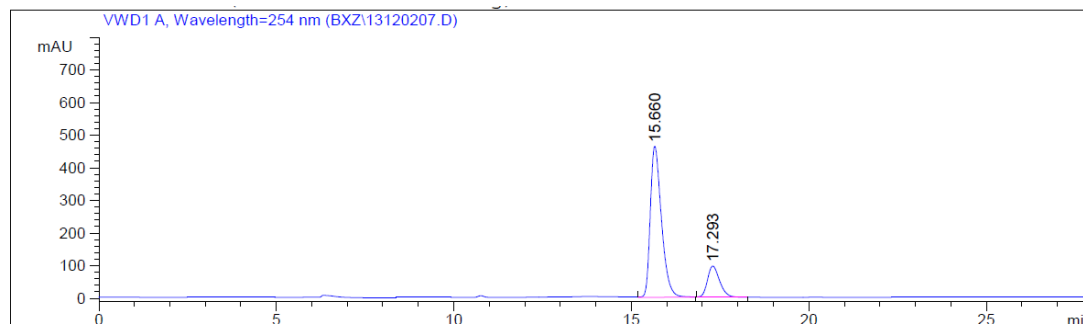

| Peak # | RetTime [min] | Type | Width [min] | Area mAU   | Area *s | Height [mAU] | Area %  |
|--------|---------------|------|-------------|------------|---------|--------------|---------|
| 1      | 15.660        | VB   | 0.3335      | 1.01070e4  |         | 462.68948    | 81.5969 |
| 2      | 17.293        | BB   | 0.3629      | 2279.49219 |         | 95.49428     | 18.4031 |

**(R)-4-azido-4-benzyl-1,3-diphenyl-1H-pyrazol-5(4H)-one (4)**

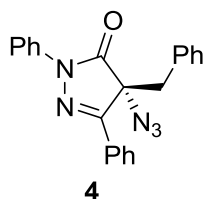

Prepared according to the procedure as oil (66.1 mg, 90% yield) after silica gel chromatography (EtOAc/petroleum ether = 1/20).  $[\alpha]_D^{17} = 232.2$  (c 0.24,  $\text{CH}_2\text{Cl}_2$ );  $^1\text{H}$  NMR (400 MHz,  $\text{CDCl}_3$ )  $\delta$  8.01-7.98 (m, 2H), 7.68-7.65 (m, 2H), 7.53-7.48 (m, 3H), 7.38-7.34 (m, 2H), 7.22-7.18 (m, 1H), 7.14-7.04 (m, 3H), 6.86-6.84 (m, 2H), 3.57 (d,  $J = 12.8$  Hz, 1H), 3.46 (d,  $J = 12.8$  Hz, 1H);  $^{13}\text{C}$  NMR (101 MHz,  $\text{CDCl}_3$ )  $\delta$  170.1, 154.9, 136.9, 131.3, 131.1, 129.8, 129.7, 129.0, 128.9, 128.4, 128.0, 126.8, 126.0, 119.5, 69.9, 41.4; IR (KBr): 3068, 2913, 2108, 1716, 1597, 1495, 1392, 1250, 1131, 756, 723, 690  $\text{cm}^{-1}$ ; HRMS (ESI)  $m/z$  Calcd. for  $\text{C}_{22}\text{H}_{17}\text{N}_5\text{NaO}$  ( $[\text{M}+\text{Na}]^+$ ) 390.1325, Found 390.1312; Enantiomeric excess was determined to be 86% (determined by HPLC using chiral OD-H column, hexane/2-propanol = 98/2,  $\lambda = 254$  nm, 30  $^\circ\text{C}$ , 0.5 mL/min,  $t_{\text{major}} = 15.5$  min,  $t_{\text{minor}} = 16.9$  min).

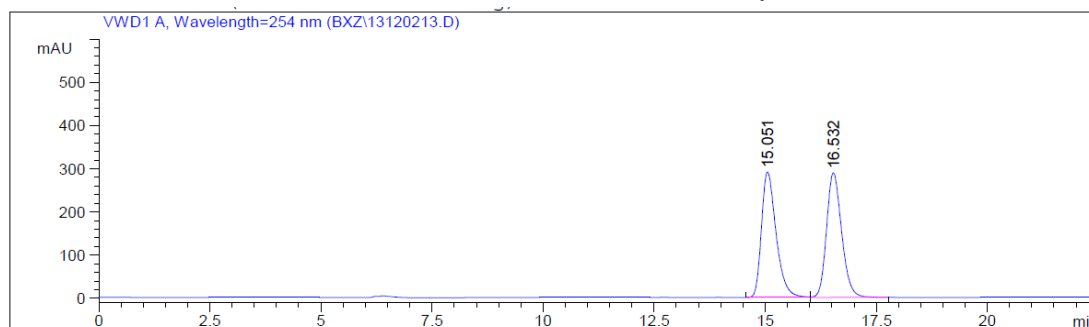

| Peak # | RetTime [min] | Type | Width [min] | Area mAU   | Area *s | Height [mAU] | Area %  |
|--------|---------------|------|-------------|------------|---------|--------------|---------|
| 1      | 15.051        | BV   | 0.3489      | 6656.18945 |         | 290.48590    | 49.4519 |
| 2      | 16.532        | VB   | 0.3626      | 6803.74268 |         | 288.39896    | 50.5481 |

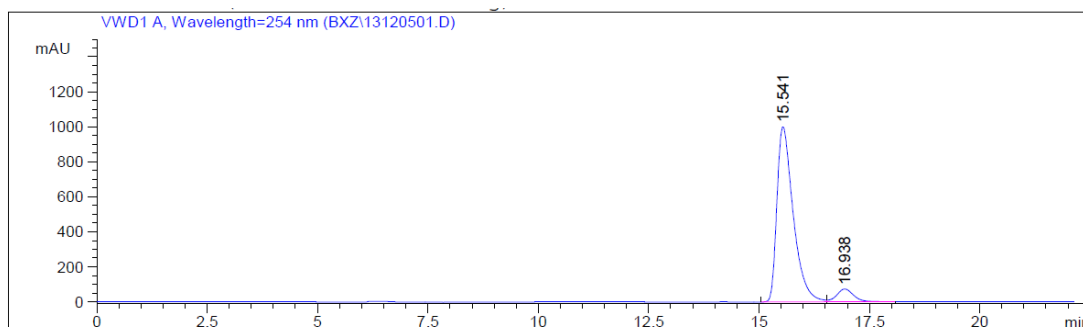

| Peak # | RetTime [min] | Type | Width [min] | Area mAU   | Area *s | Height [mAU] | Area %  |
|--------|---------------|------|-------------|------------|---------|--------------|---------|
| 1      | 15.541        | PV   | 0.3868      | 2.56648e4  |         | 999.93011    | 92.9016 |
| 2      | 16.938        | VB   | 0.4063      | 1961.00342 |         | 73.40585     | 7.0984  |

**(R)-4-benzyl-1,3-diphenyl-4-(4-phenyl-1H-1,2,3-triazol-1-yl)-1H-pyrazol-5(4H)-one (5)**

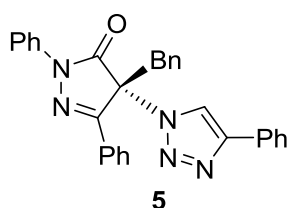

Prepared according to the procedure as white foam (60.2 mg, 80% yield) after silica gel chromatography (EtOAc/petroleum ether = 1/20).  $[\alpha]_D^{19} = 48.2$  (c 0.40,  $\text{CH}_2\text{Cl}_2$ );  $^1\text{H}$  NMR (400 MHz,  $\text{CDCl}_3$ )  $\delta$  7.95 (s, 1H), 7.86 (d,  $J = 7.5$  Hz, 2H), 7.68-7.46 (m, 4H), 7.48-7.32 (m, 8H), 7.24-7.14 (m, 2H), 7.10 (t,  $J = 7.3$  Hz, 2H), 6.96 (d,  $J = 7.1$  Hz, 2H), 4.26 (d,  $J = 12.7$  Hz,

1H), 4.18 (d,  $J = 12.7$  Hz, 1H);  $^{13}\text{C}$  NMR (101 MHz,  $\text{CDCl}_3$ )  $\delta$  168.6, 154.3, 148.7, 136.8, 131.3, 130.4, 130.1, 129.9, 129.3, 128.9, 128.7, 128.4, 128.3, 126.4, 126.3, 126.0, 119.7, 118.5, 73.0, 40.4; IR (KBr): 3062, 2920, 1726, 1597, 1496, 1392, 1120, 1026, 760, 725, 690  $\text{cm}^{-1}$ ; HRMS (ESI)  $m/z$  Calcd. for  $\text{C}_{30}\text{H}_{24}\text{N}_5\text{O}$  ( $[\text{M}+\text{H}]^+$ ) 470.1975, Found 470.1984; Enantiomeric excess was determined to be 86% (determined by HPLC using chiral OD-H column, hexane/2-propanol = 9/1,  $\lambda = 254$  nm, 30  $^\circ\text{C}$ , 0.5 mL/min,  $t_{\text{major}} = 36.9$  min,  $t_{\text{minor}} = 56.9$  min).

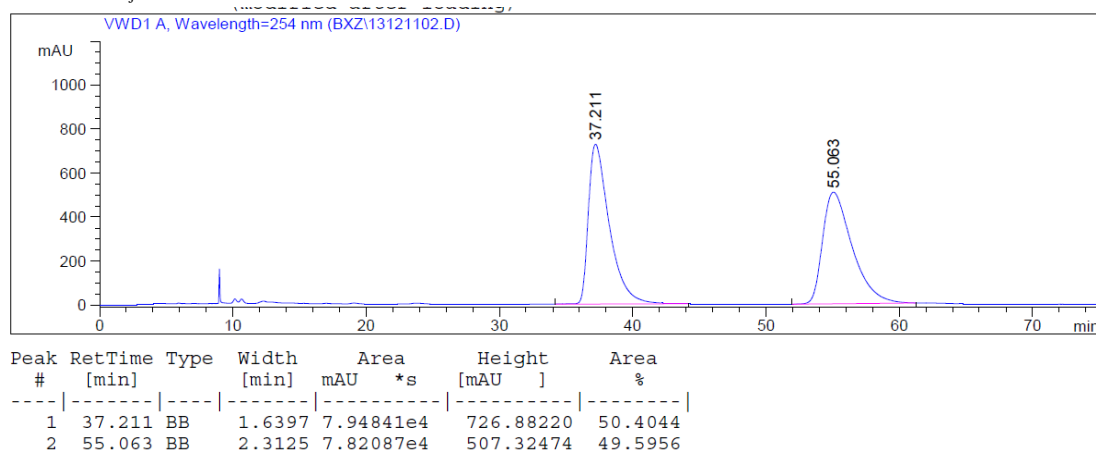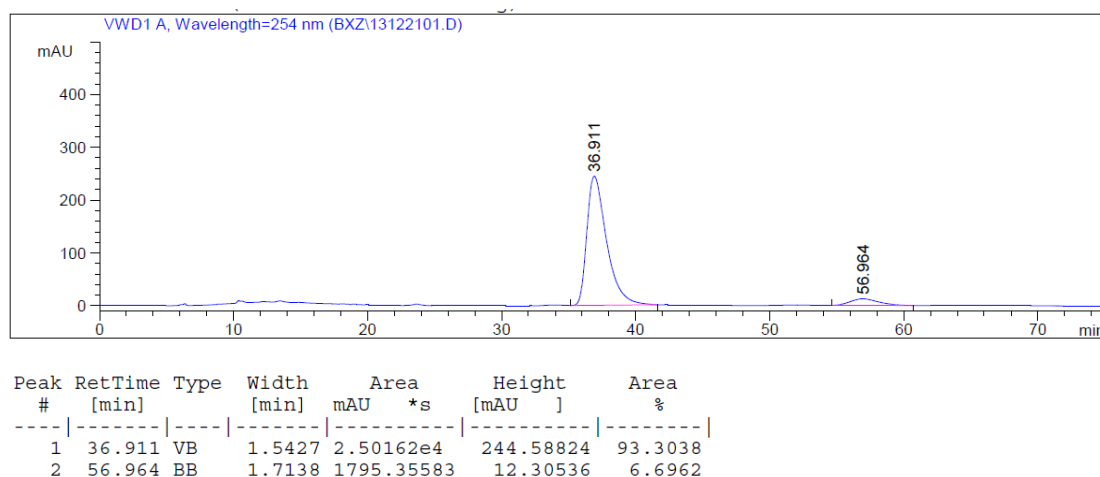

**(S)-4-chloro-1,3-diphenyl-4-((3-phenylisoxazol-5-yl)methyl)-1H-pyrazol-5(4H)-one (6)**

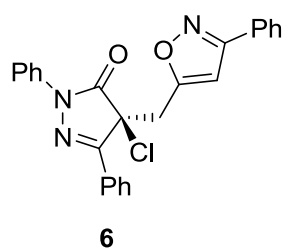

Prepared according to the procedure as oil (61.1 mg, 96% yield) after silica gel chromatography (EtOAc/petroleum ether = 1/10).  $[\alpha]_{\text{D}}^{20} = -20.4$  ( $c$  0.46,  $\text{CH}_2\text{Cl}_2$ );  $^1\text{H}$  NMR (400 MHz,  $\text{CDCl}_3$ )  $\delta$  8.04 (d,  $J = 6.3$  Hz, 2H), 7.89 (d,  $J = 8.0$  Hz, 2H), 7.59-7.49 (m, 5H), 7.44-7.35 (m, 5H), 7.26-7.21 (m, 1H), 6.21 (s, 1H), 3.99 (d,  $J = 14.7$  Hz, 1H), 3.92 (d,  $J = 14.8$  Hz, 1H);  $^{13}\text{C}$  NMR (101 MHz,  $\text{CDCl}_3$ )  $\delta$  168.7, 164.7, 162.6, 155.1, 137.2, 131.5, 130.3, 129.2, 129.2, 129.0, 128.9, 128.5, 126.9, 126.4, 119.6, 102.1, 61.8, 35.2; IR (KBr): 2950, 2912, 2867, 1721, 1594, 1407, 1389, 1132, 1076, 767, 754, 690  $\text{cm}^{-1}$ ; HRMS (ESI)  $m/z$  Calcd. for  $\text{C}_{25}\text{H}_{19}\text{ClN}_3\text{O}_2$  ( $[\text{M}+\text{H}]^+$ ) 428.1160, Found 428.1174; Enantiomeric excess was determined to be 91% (determined by HPLC using chiral AD-H column, hexane/2-propanol = 9/1,  $\lambda = 254$  nm, 30  $^\circ\text{C}$ , 0.8 mL/min,  $t_{\text{major}} = 14.8$  min,  $t_{\text{minor}} = 16.6$  min).

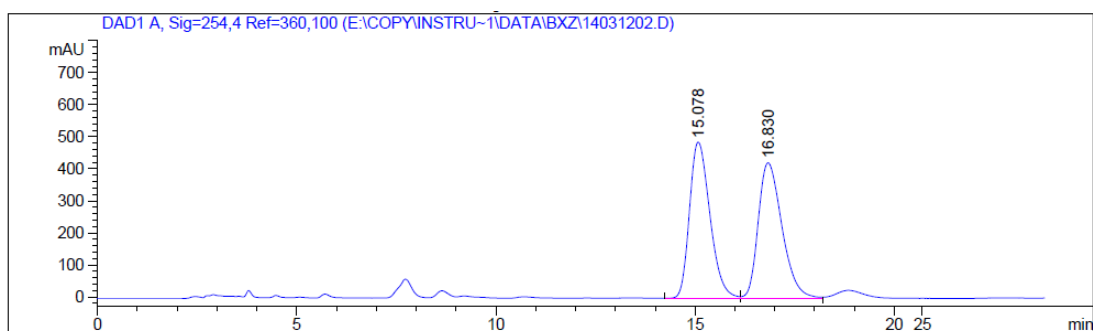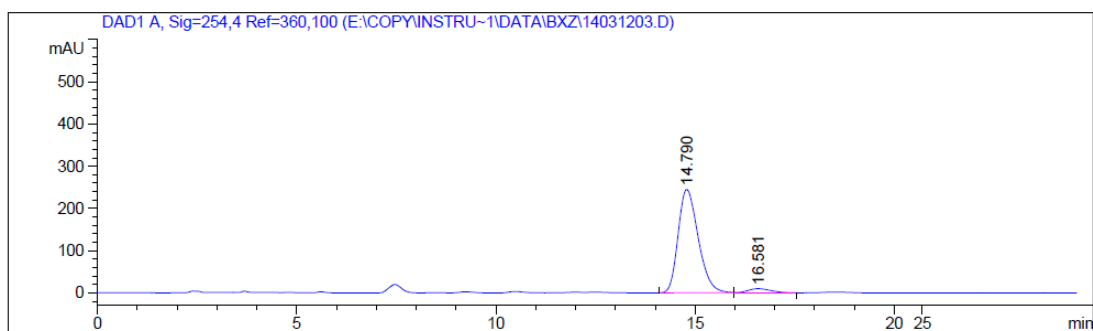

#### 4. Reference

[1] (a) P. E. Gagnon, J. L. Boivin and R. J. Paquin, *Can. J. Chem.* **1953**, *31*,1025; (b) Y.-H. Liao, W.-B. Chen, Z.-J. Wu, X.-L. Du, L.-F. Cun, X.-M. Zhang and W.-C. Yuan, *Adv. Synth. Catal.*, 2010, **352**, 827; (c) Z. Wang, Z. Yang, D. Chen, X. Liu, L. Lin and X. Feng, *Angew. Chem., Int. Ed.*, 2011, **50**, 4928.

## 5. NMR spectra for compounds

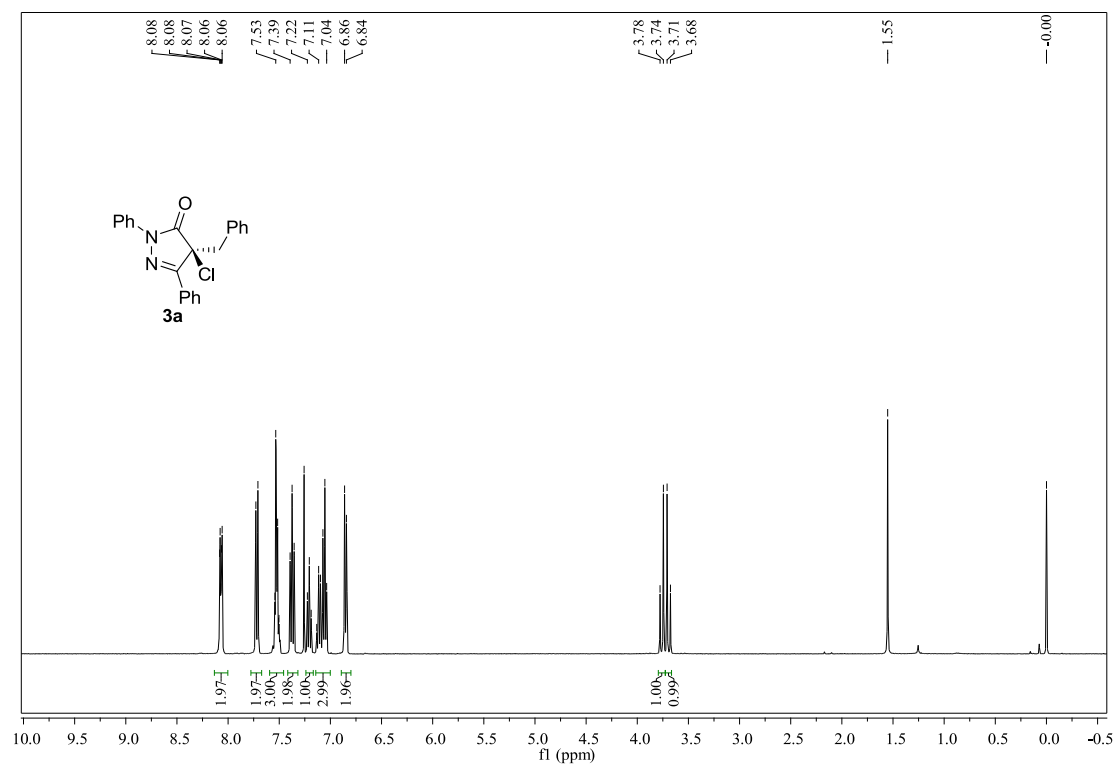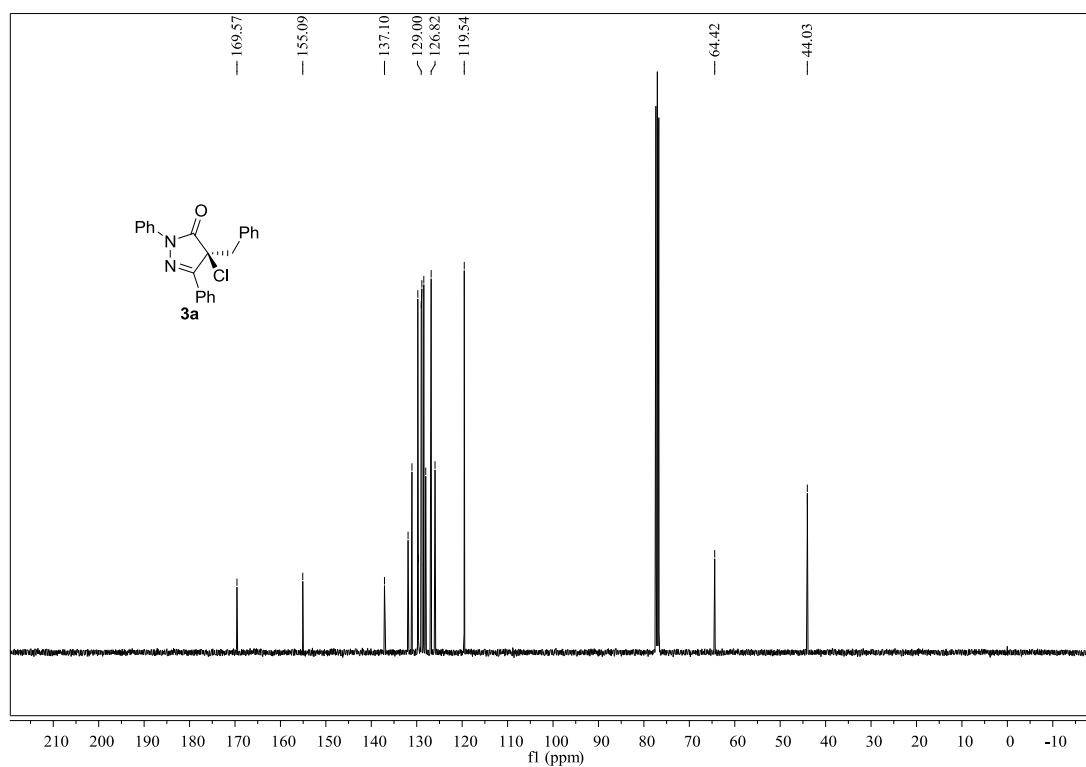

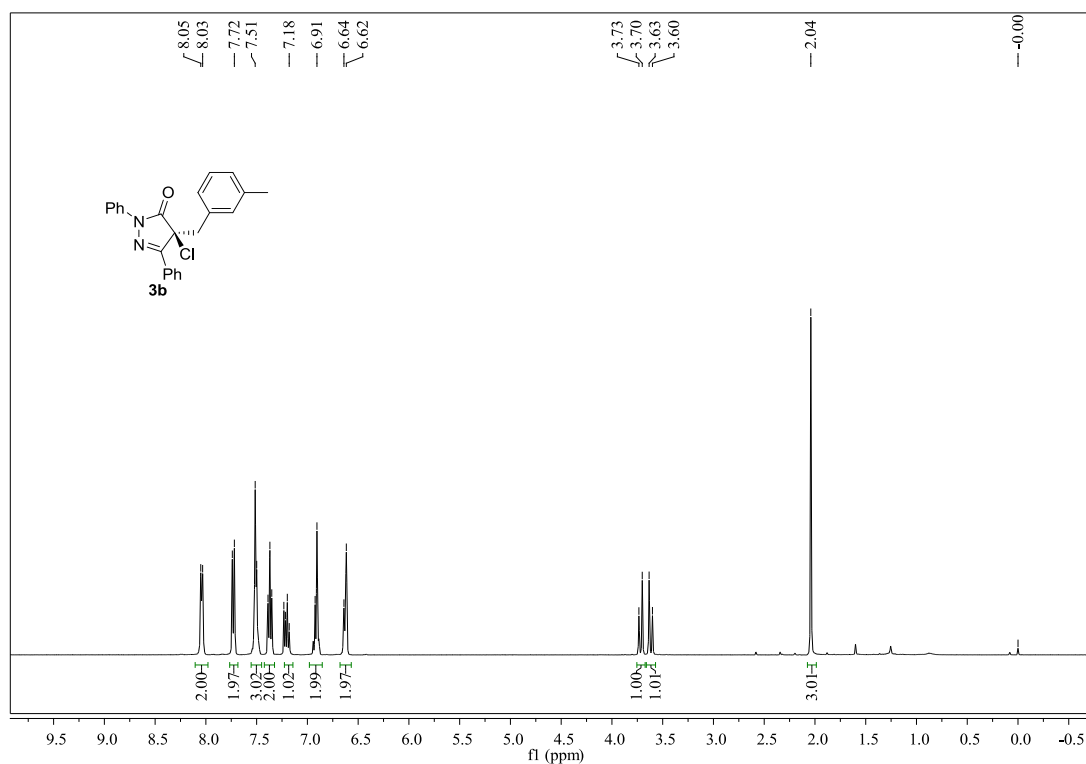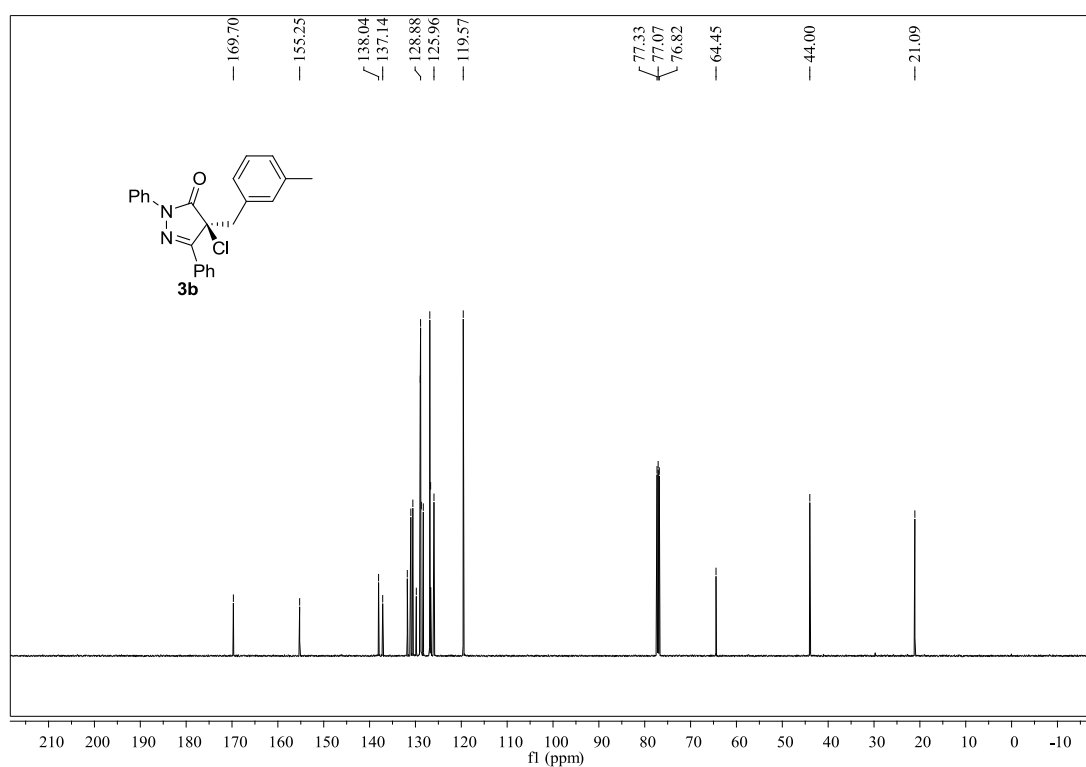



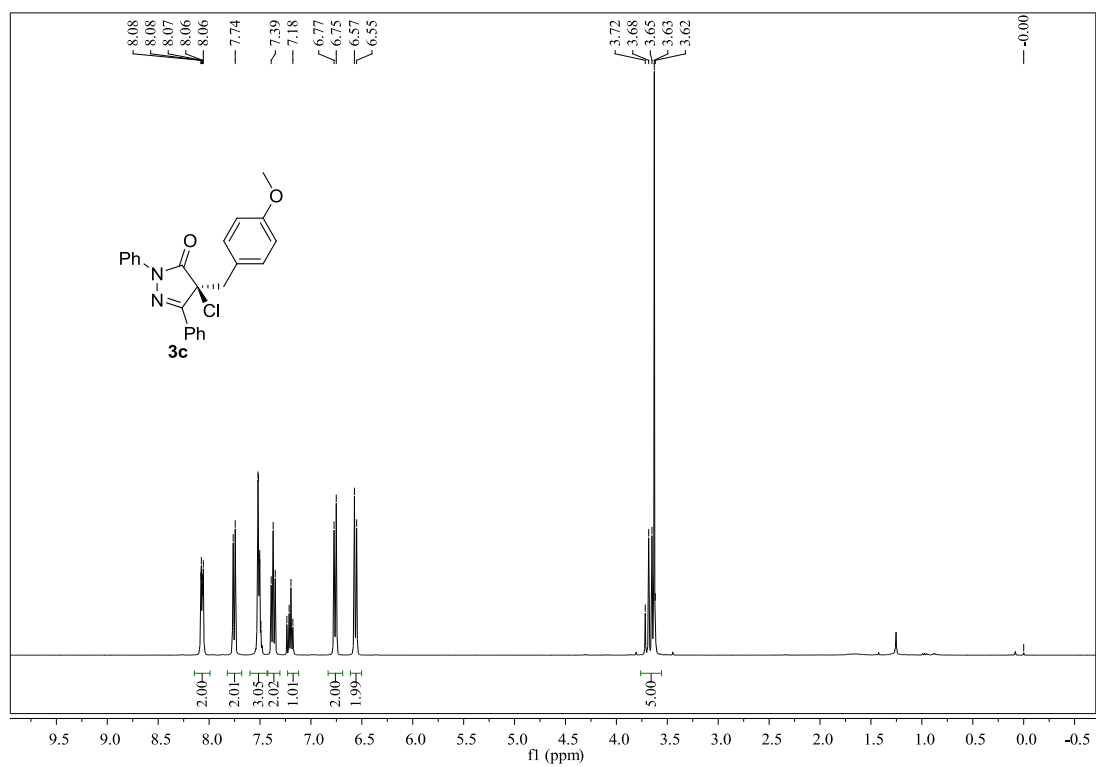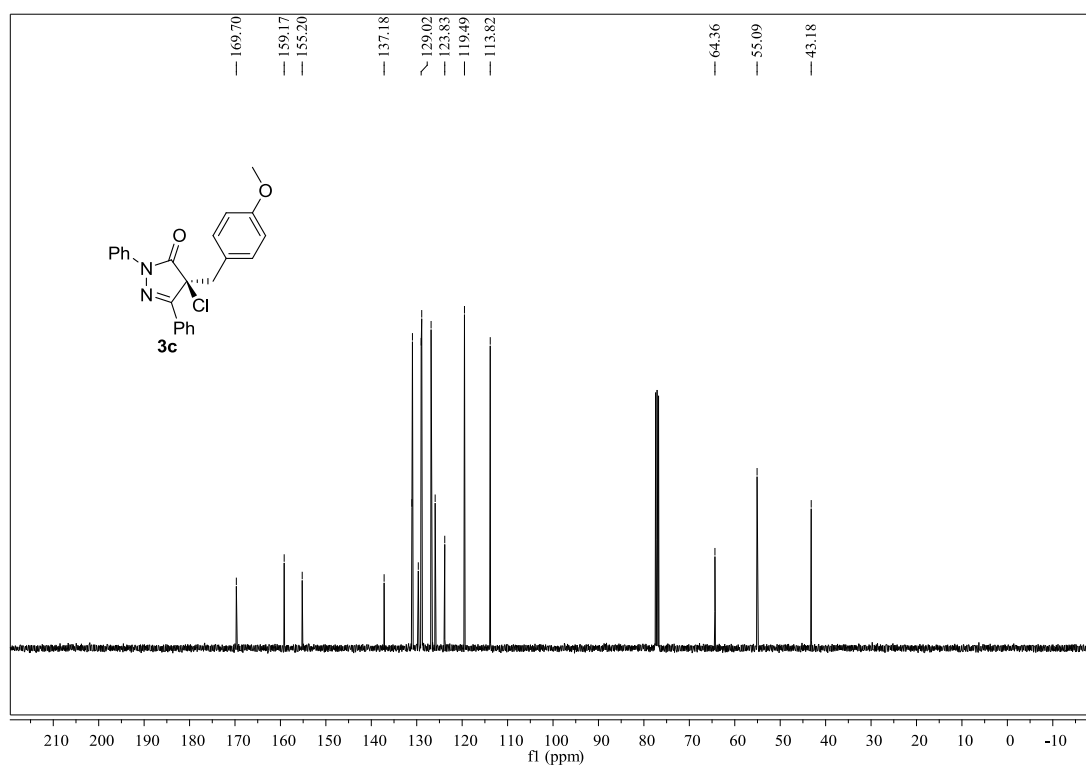

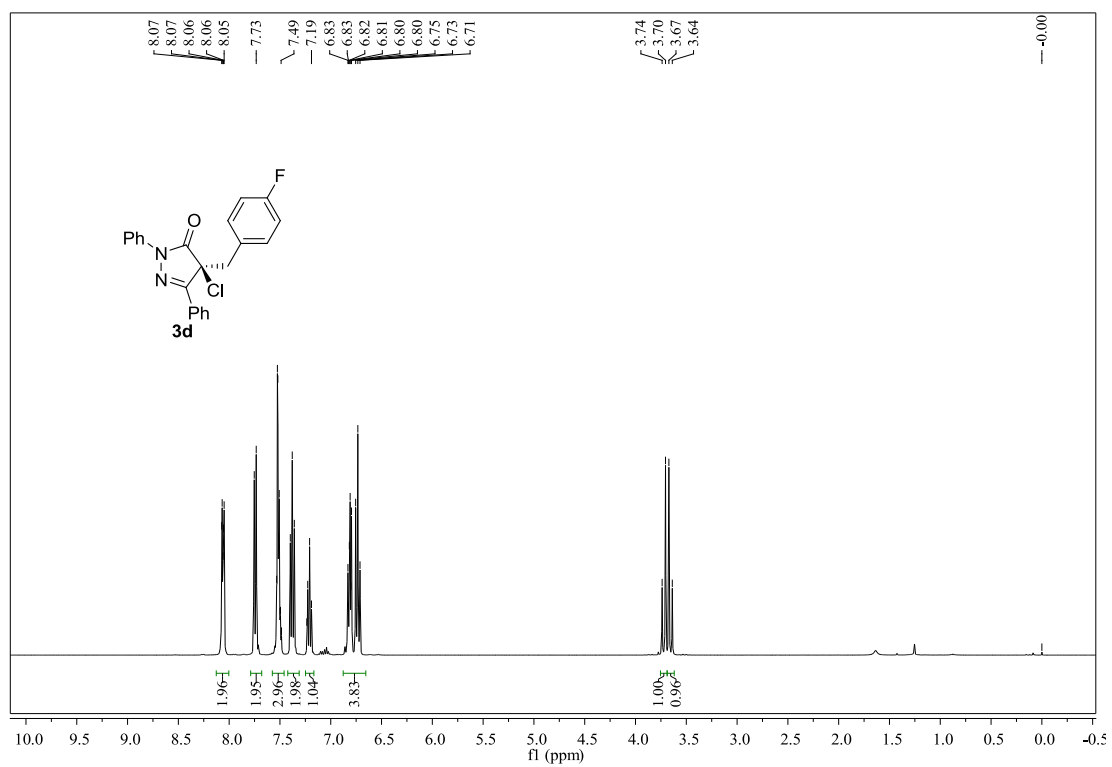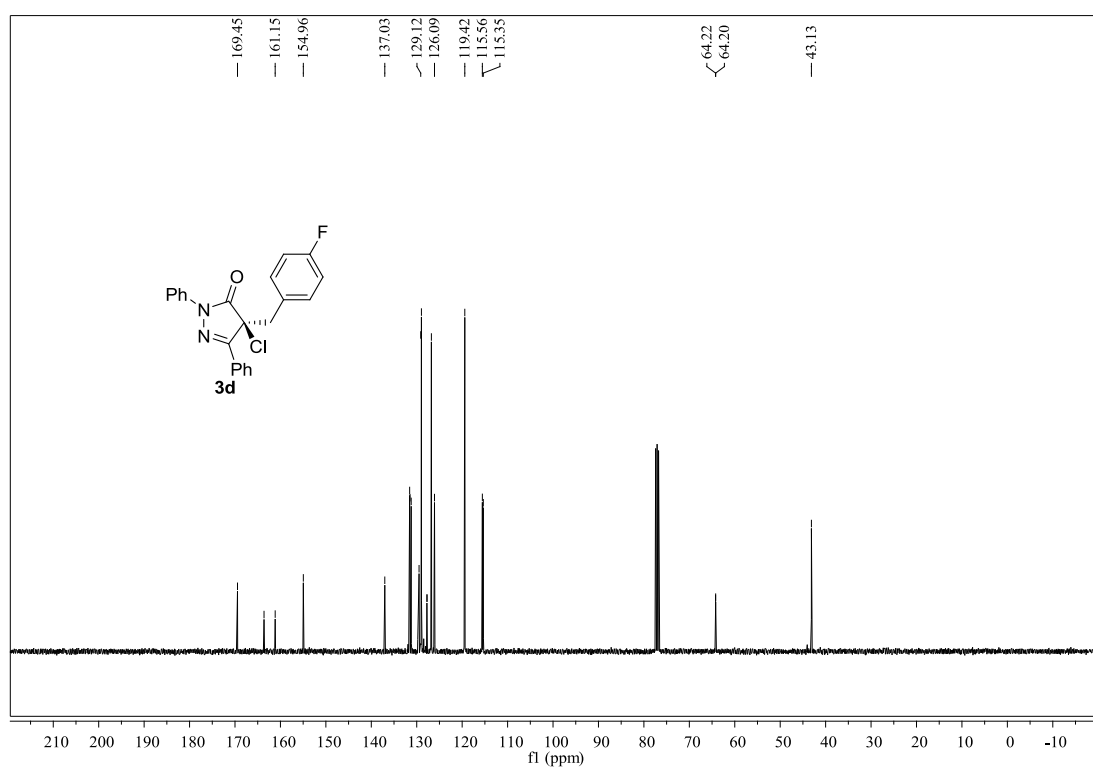

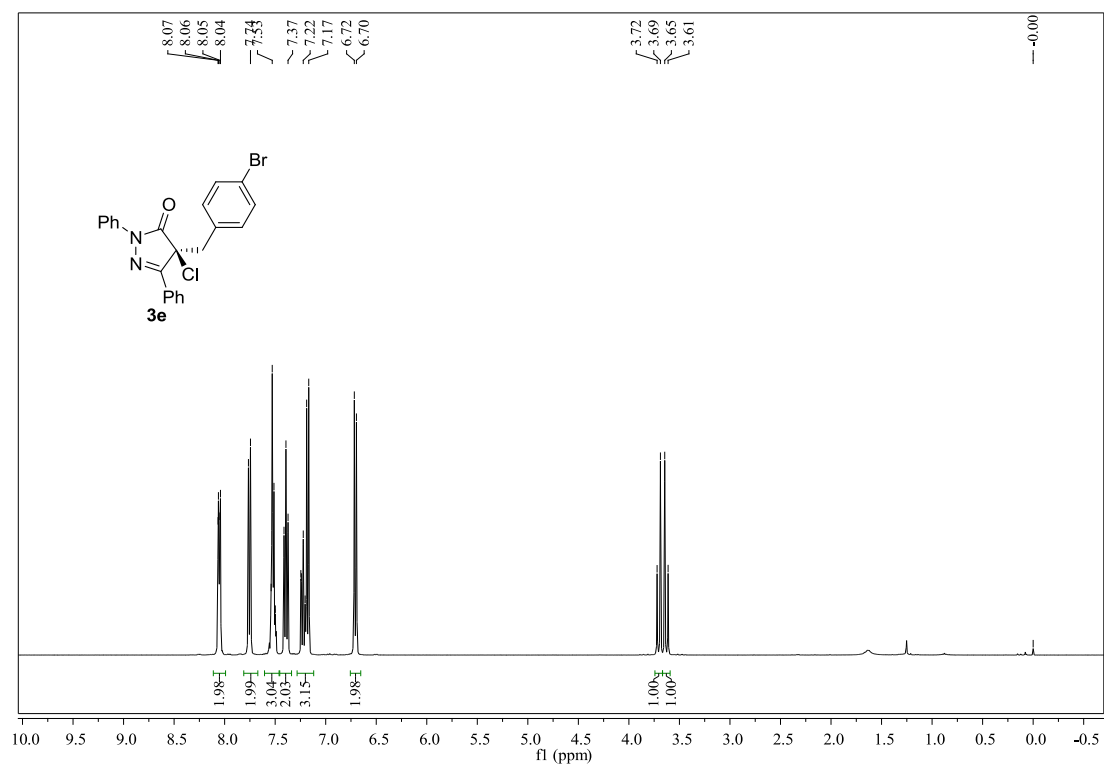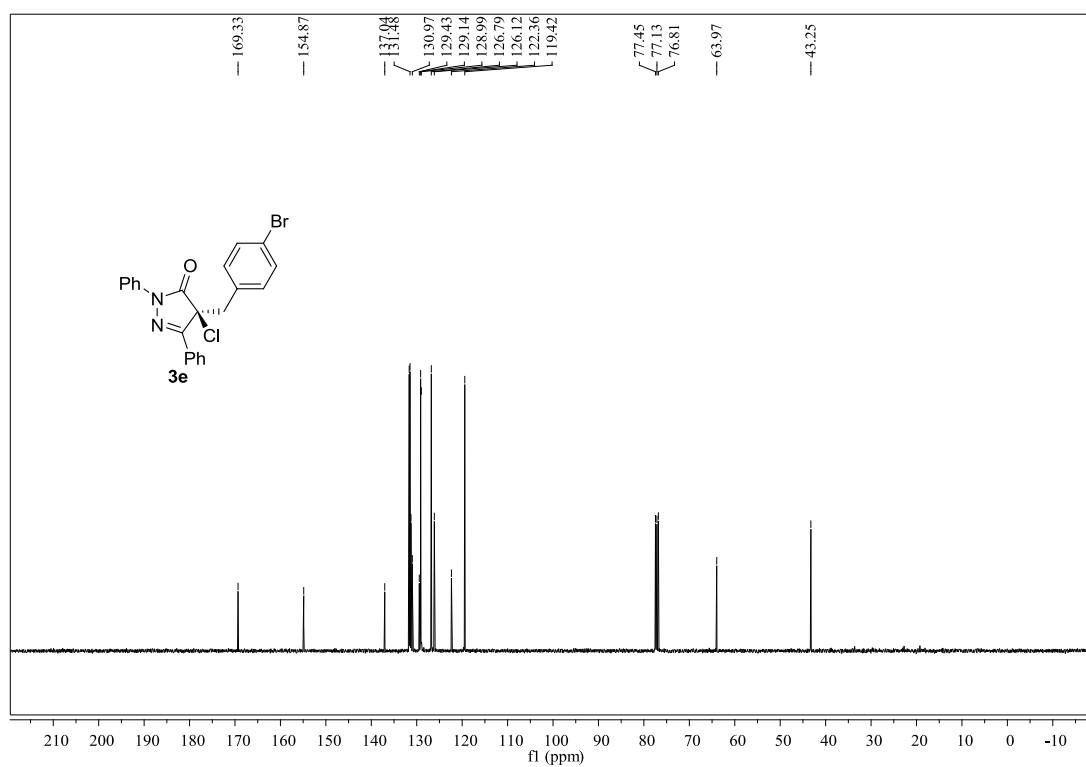

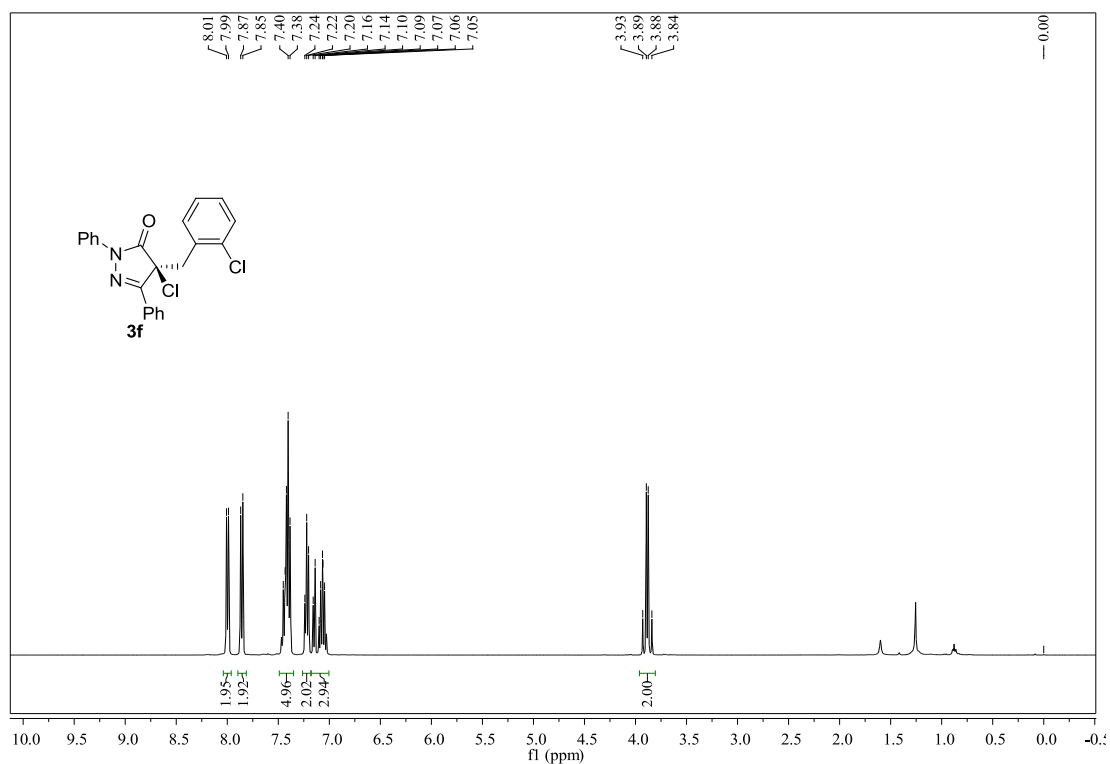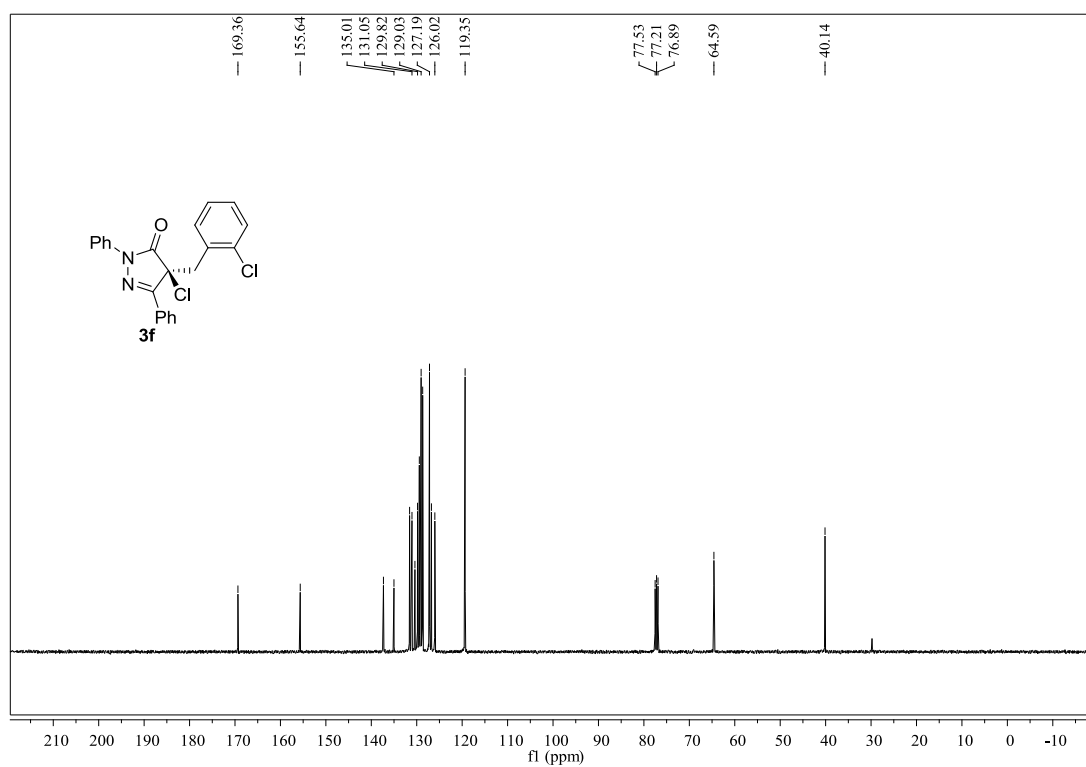

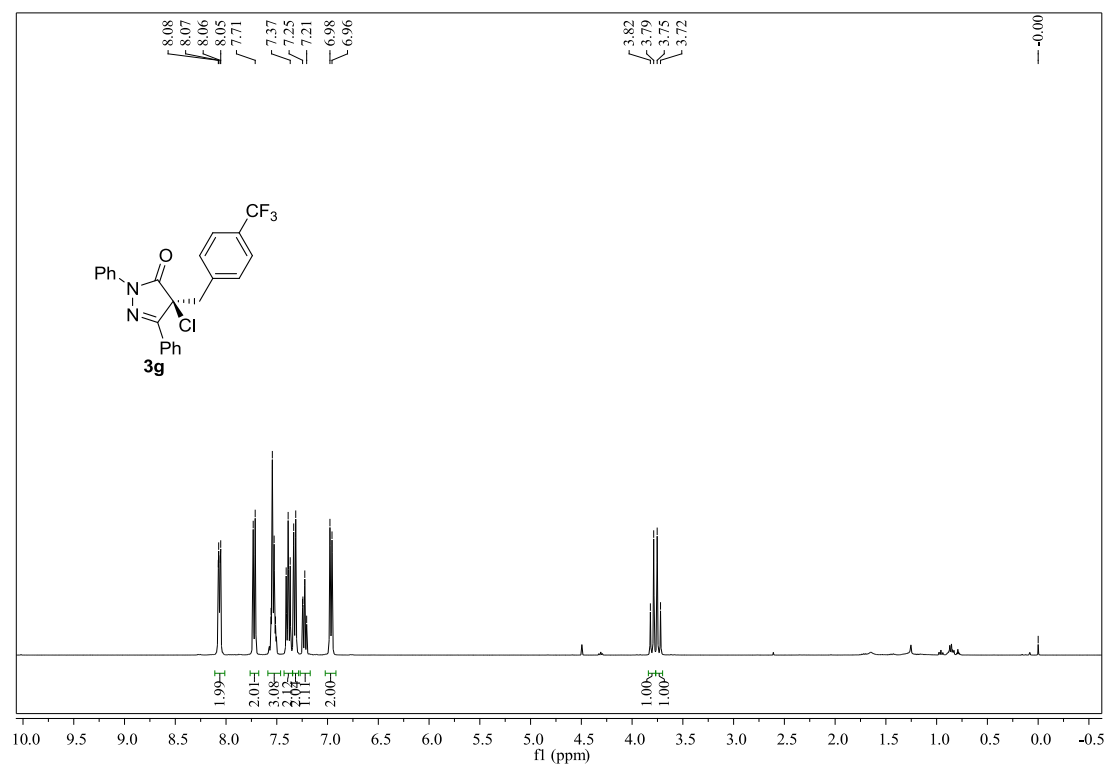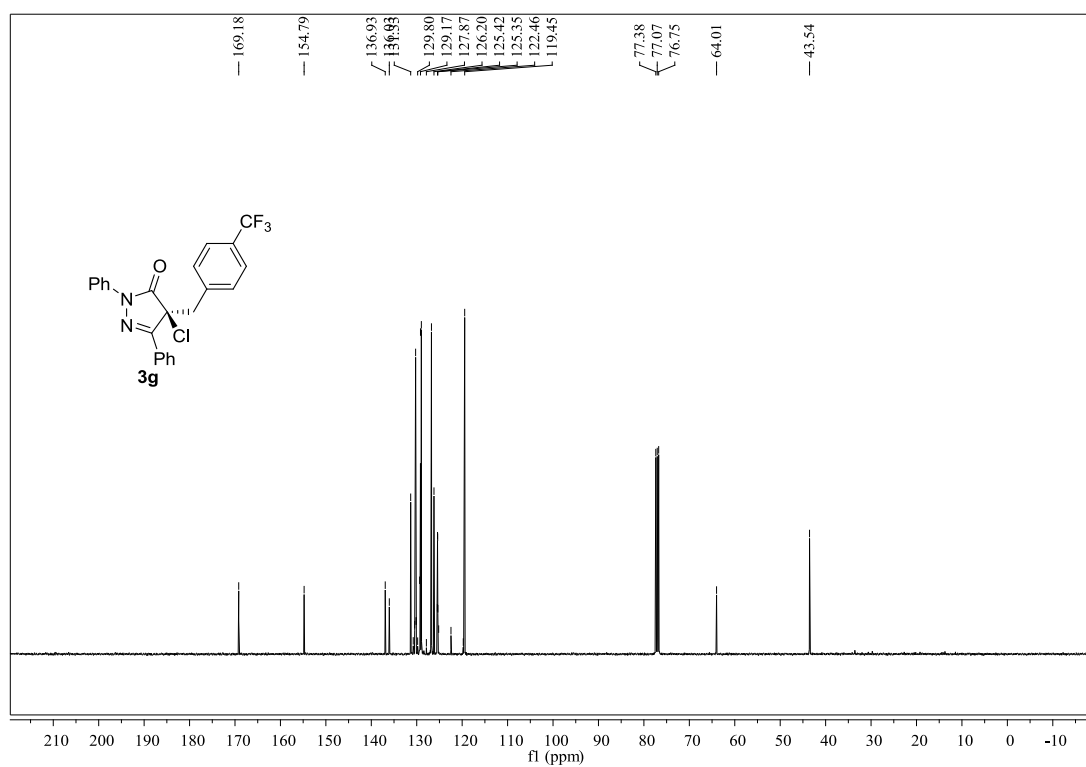

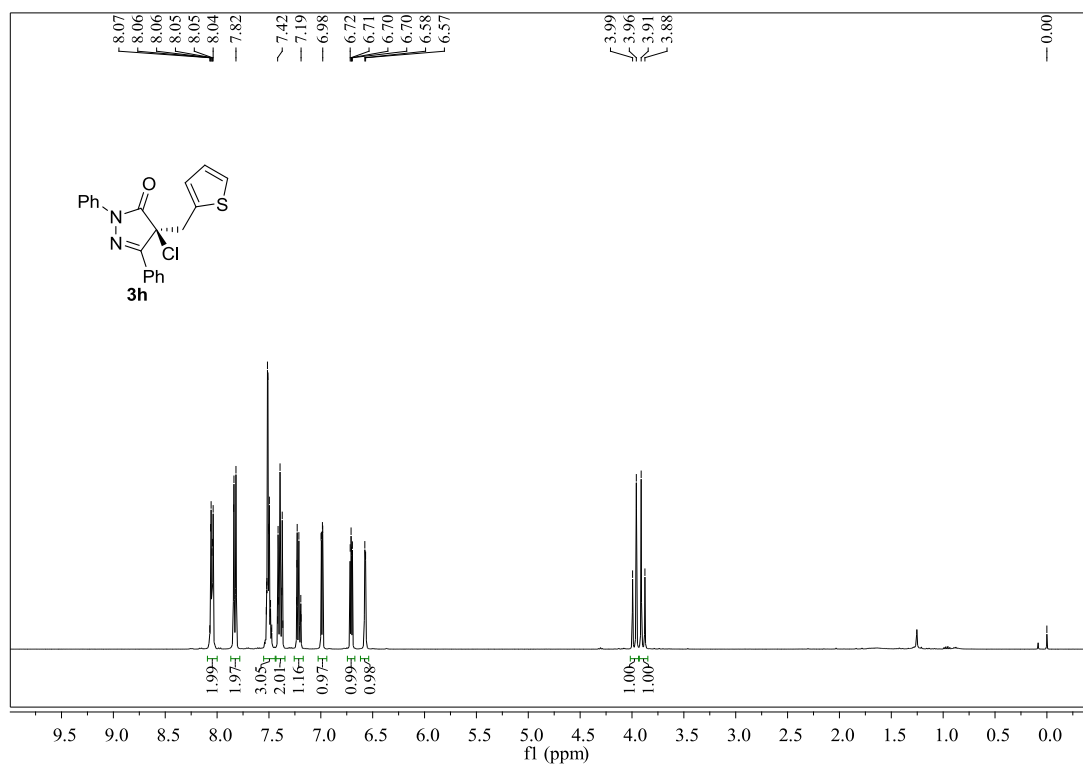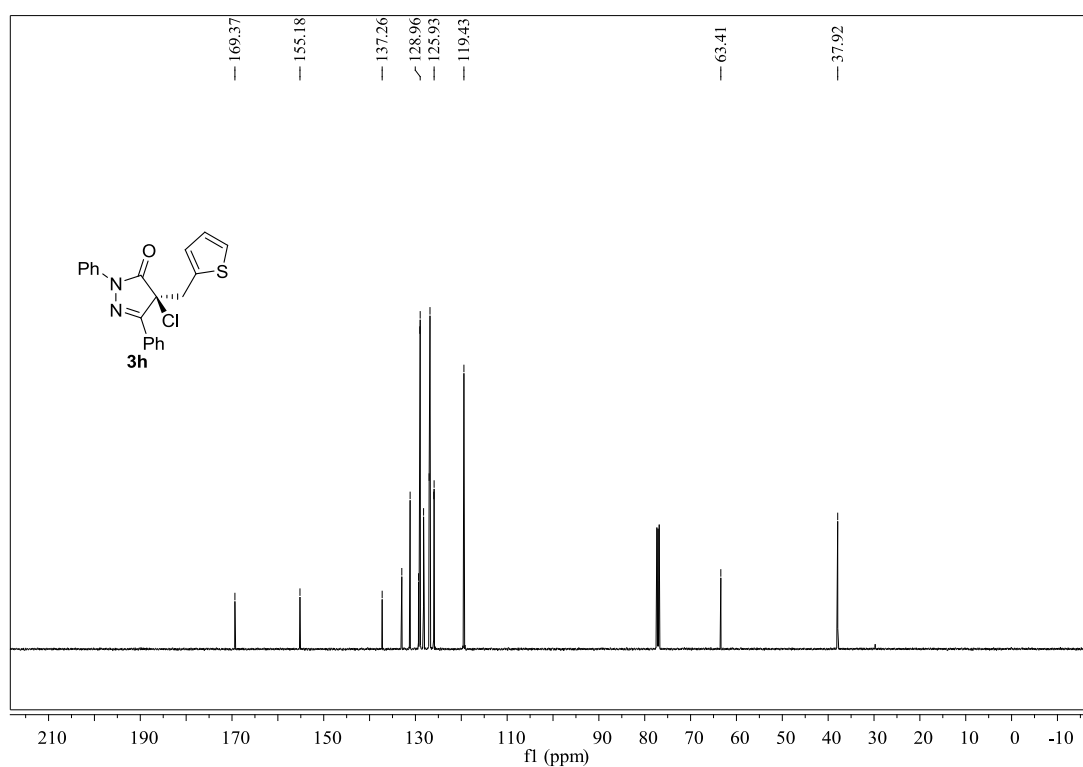

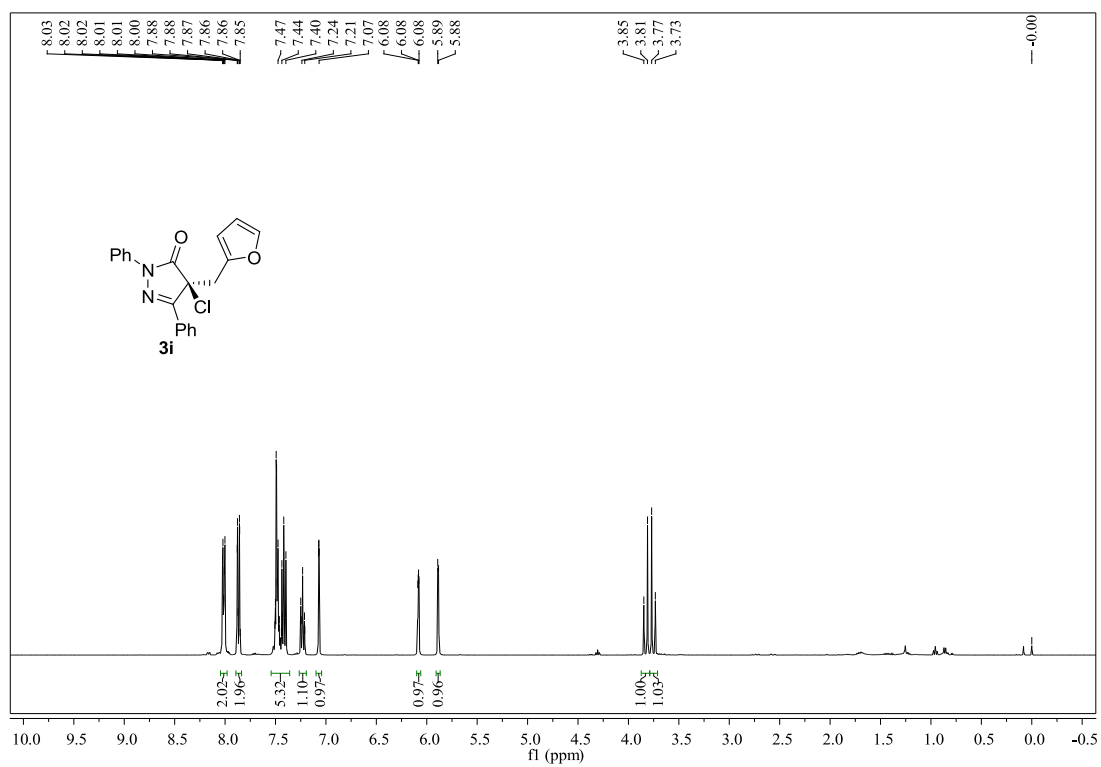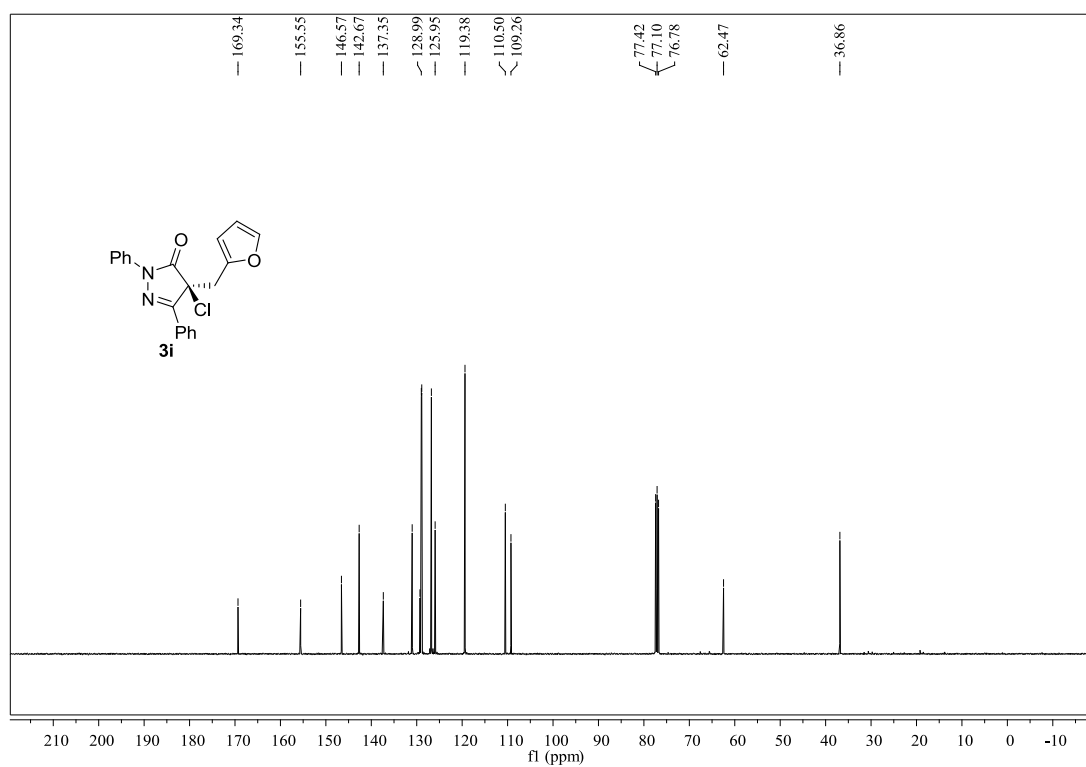

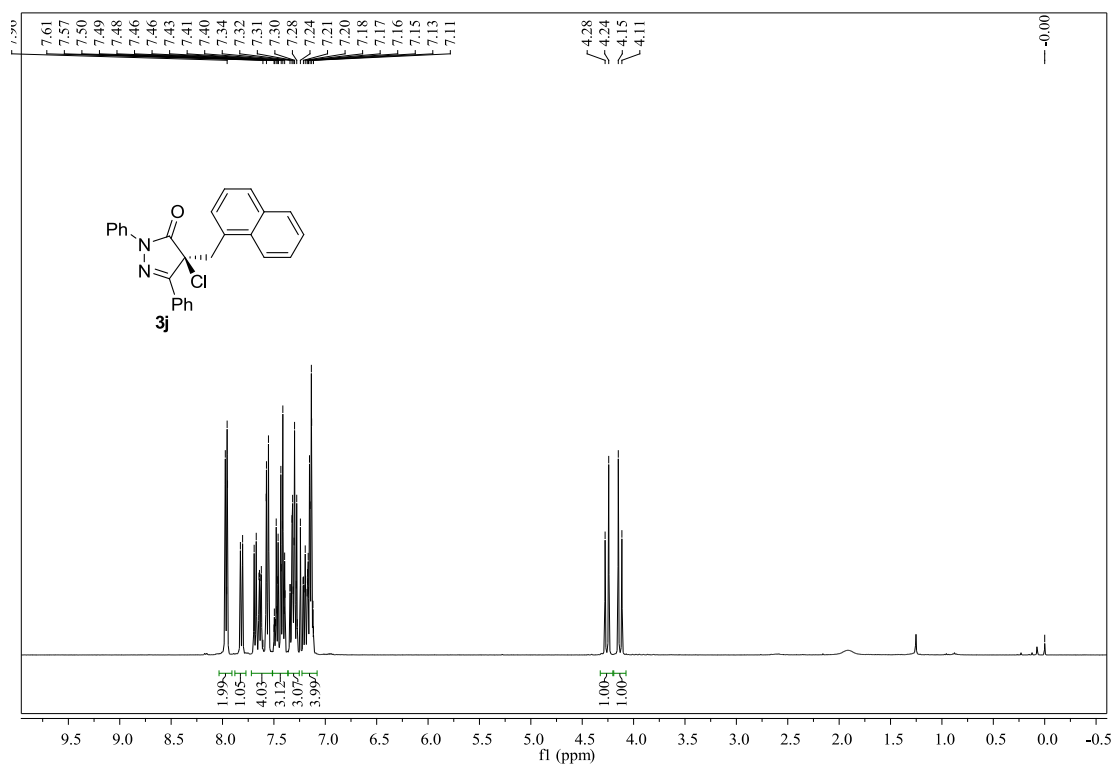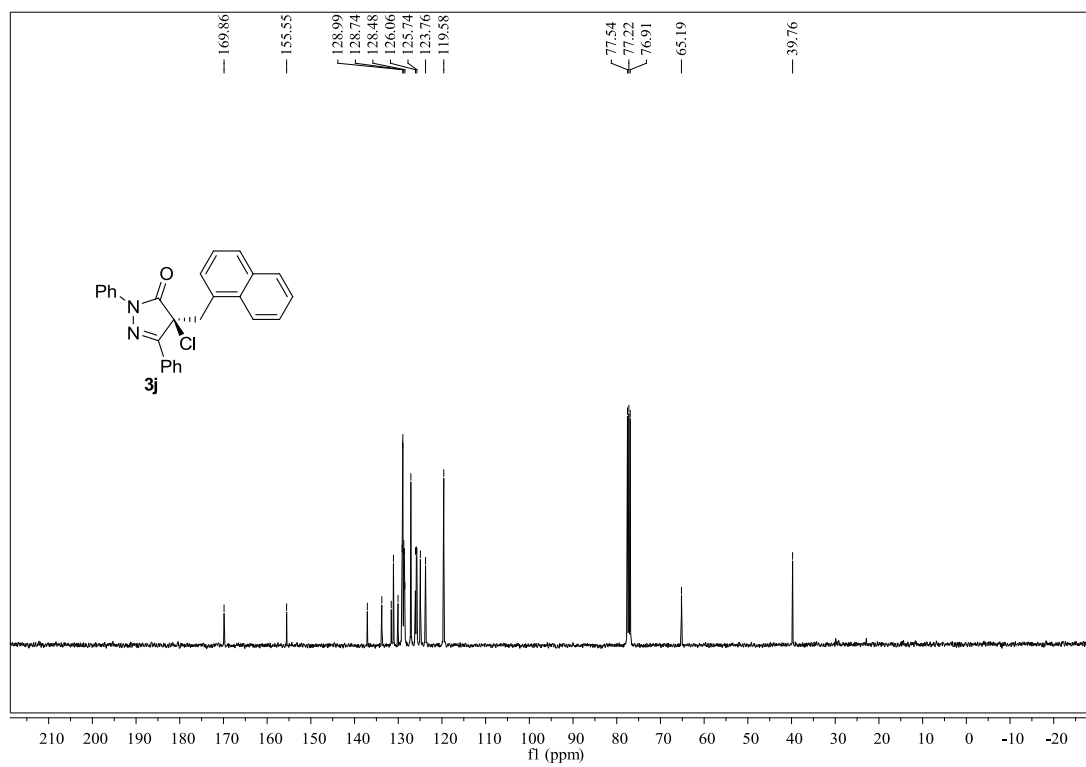



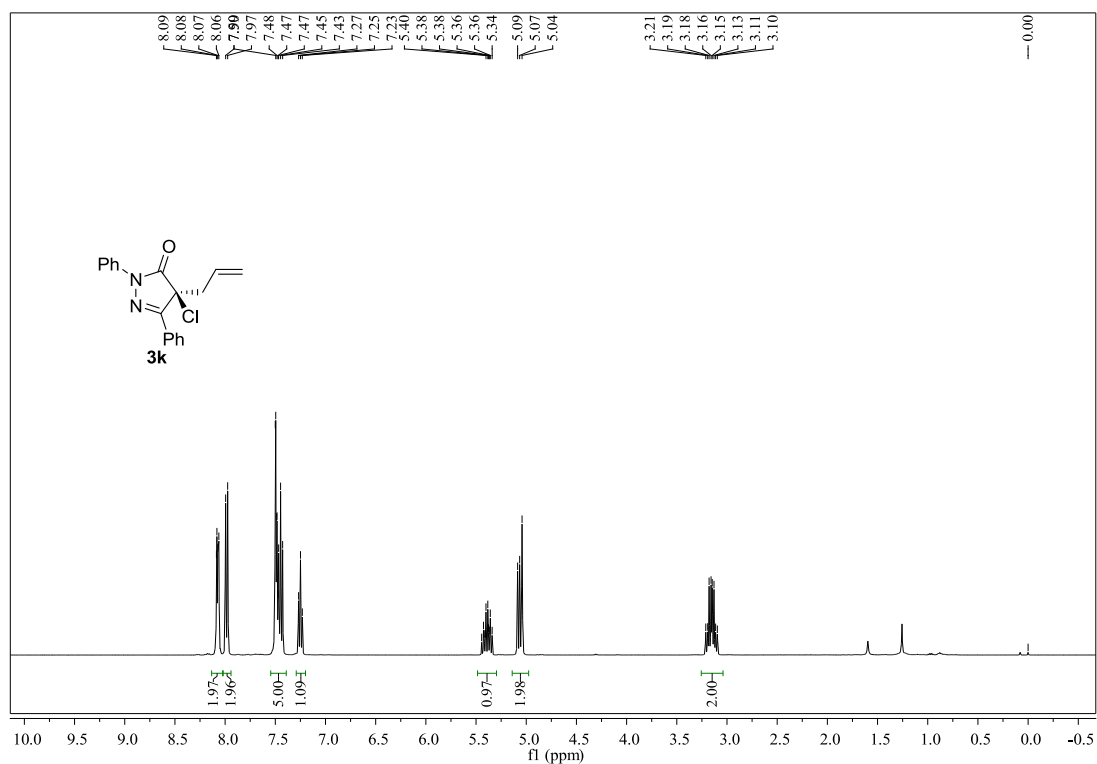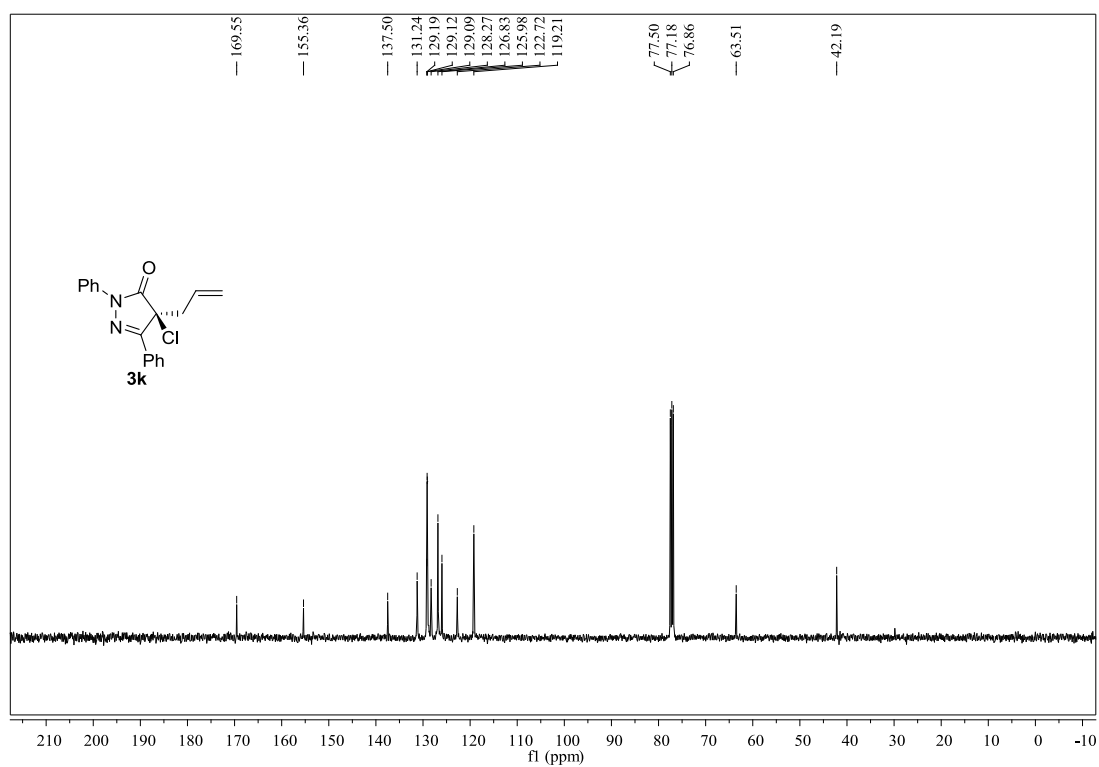

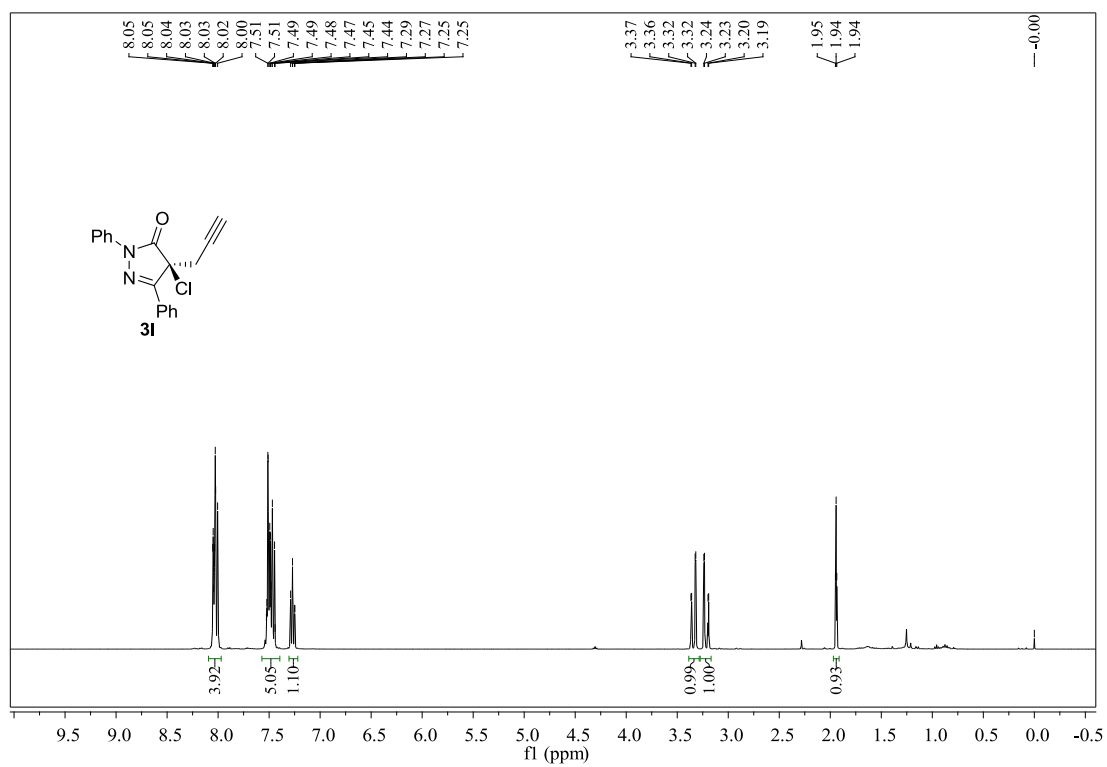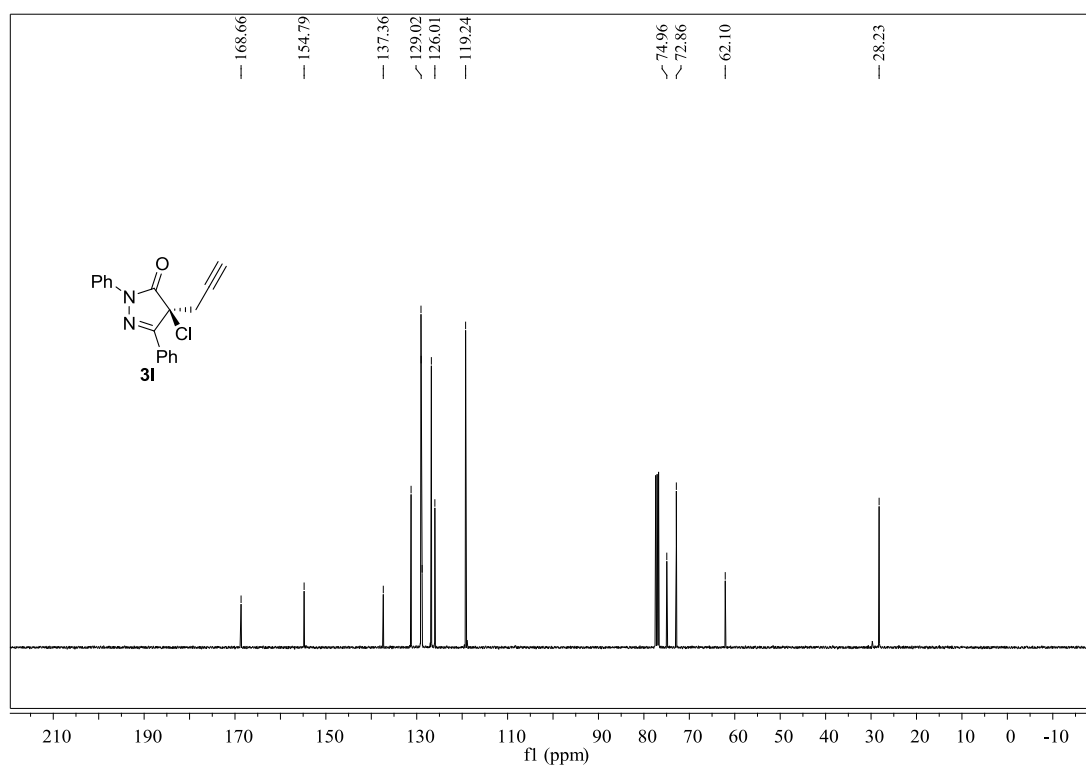

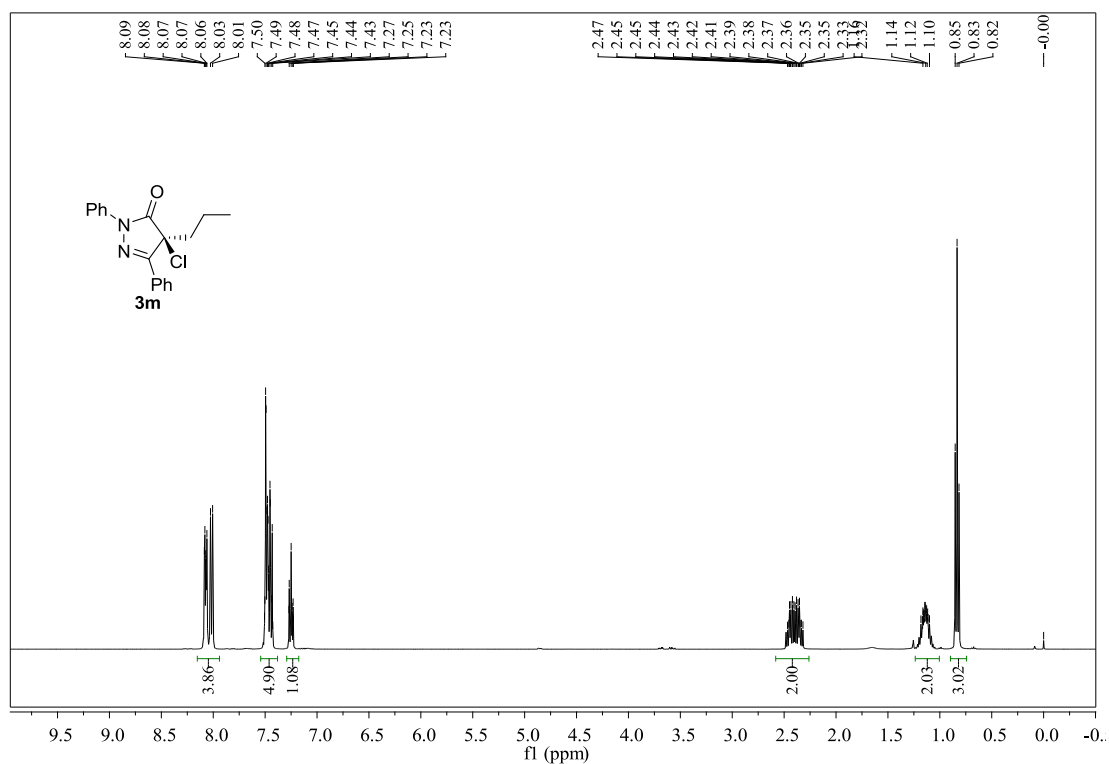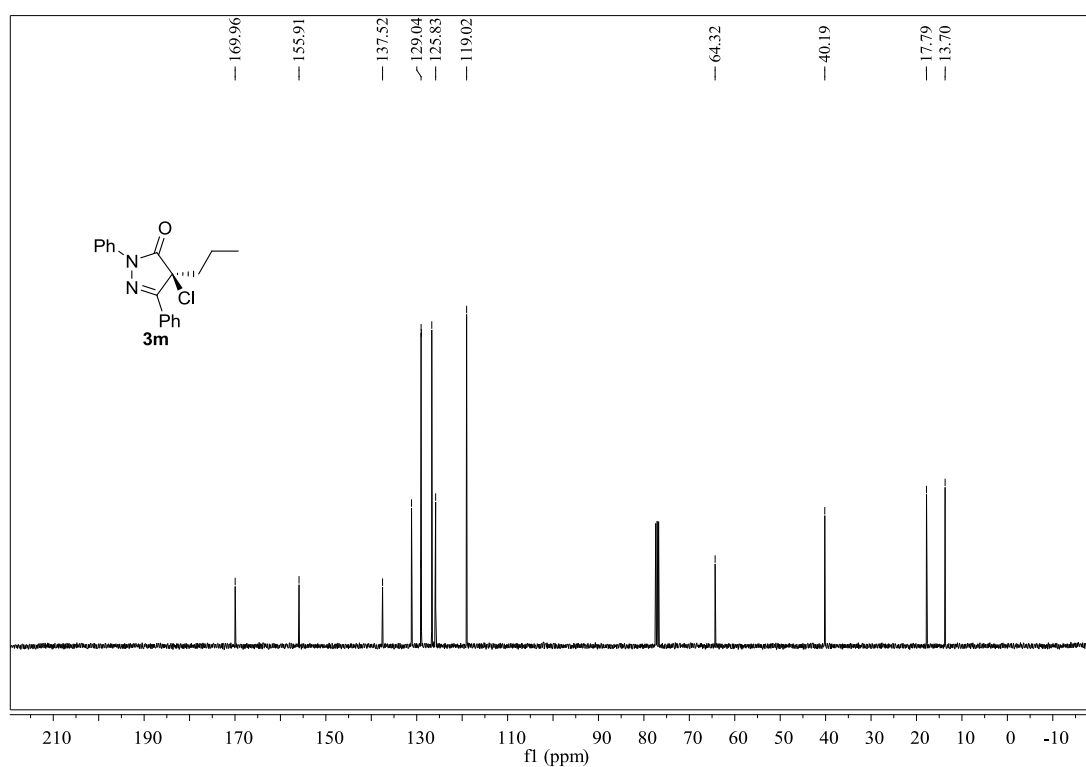

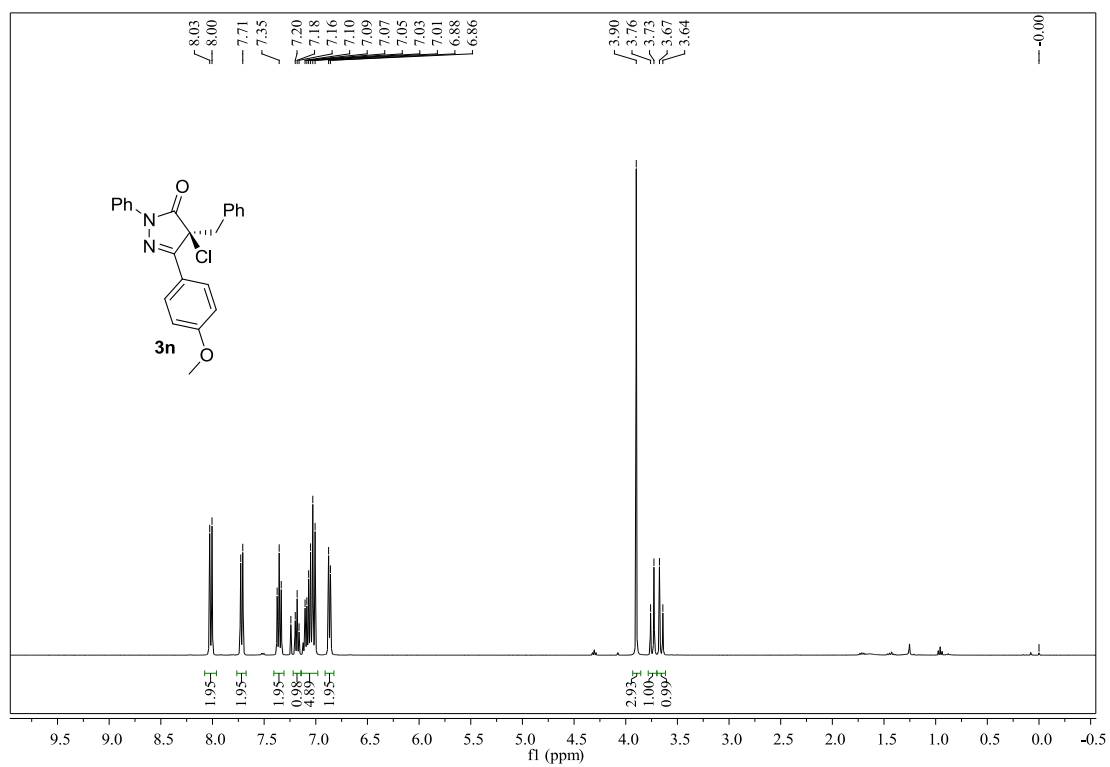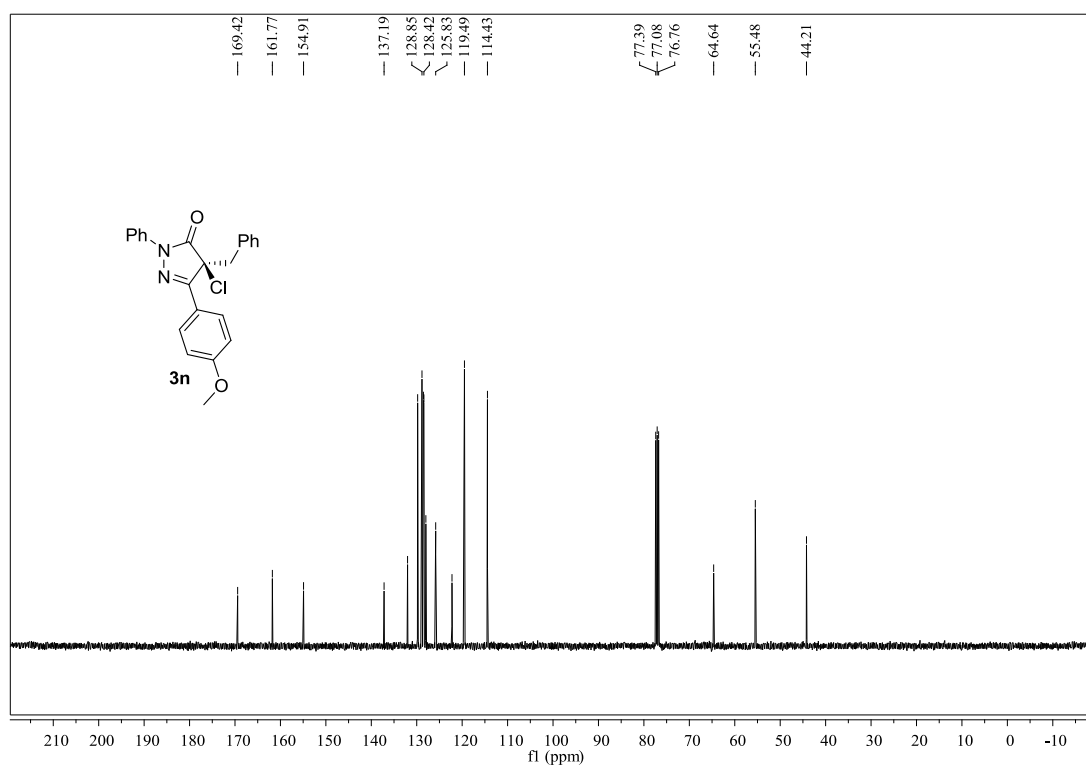

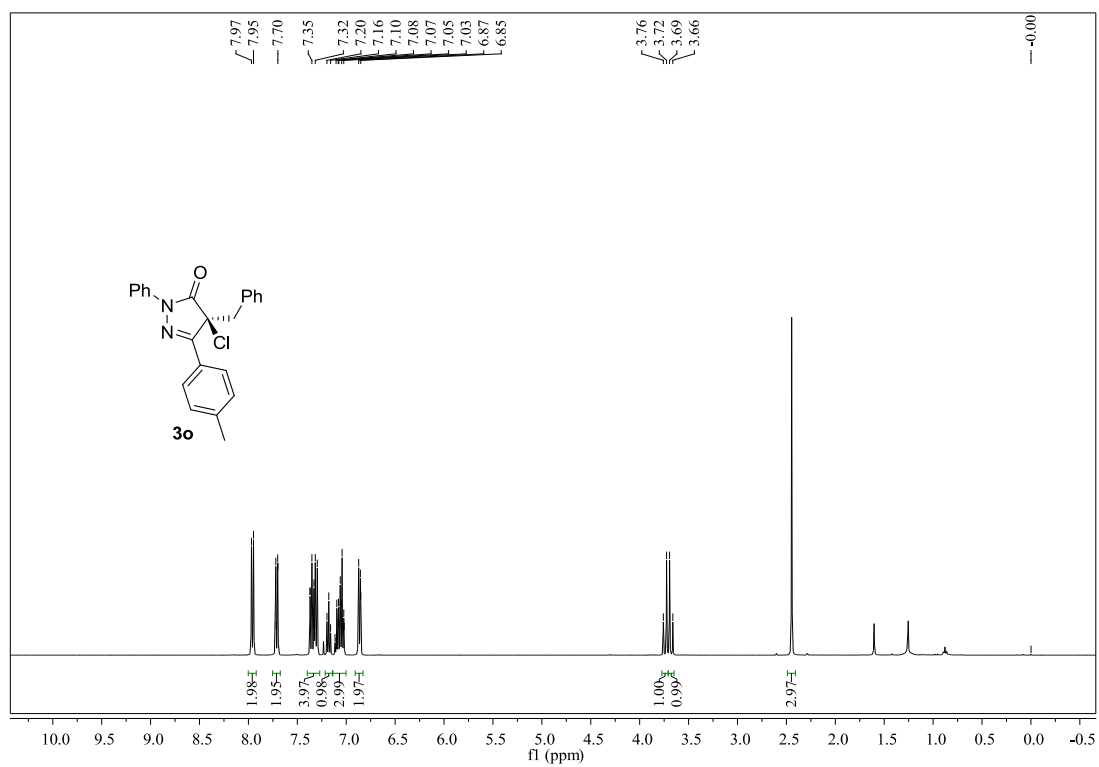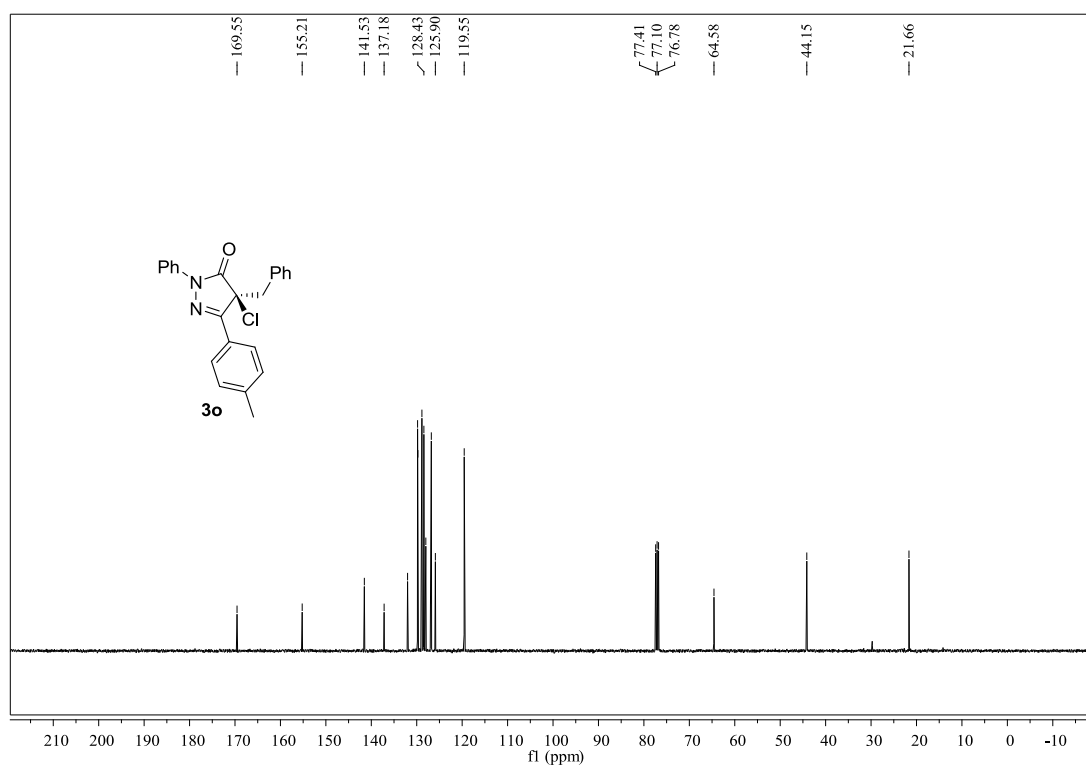

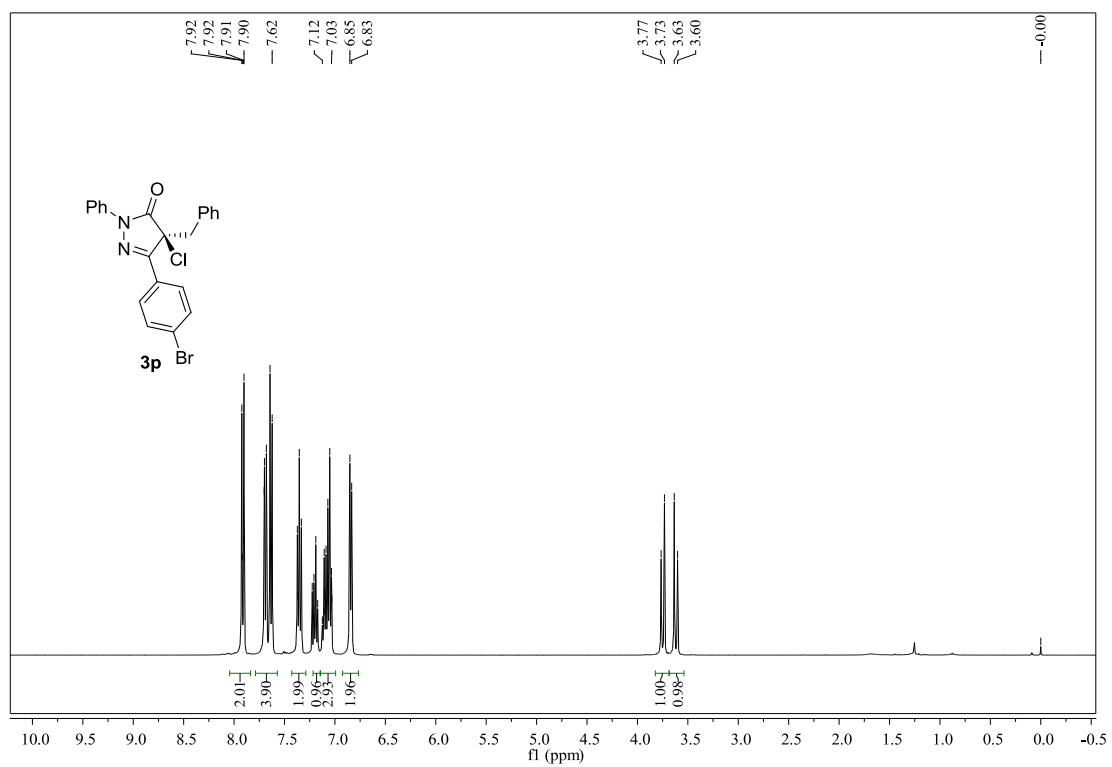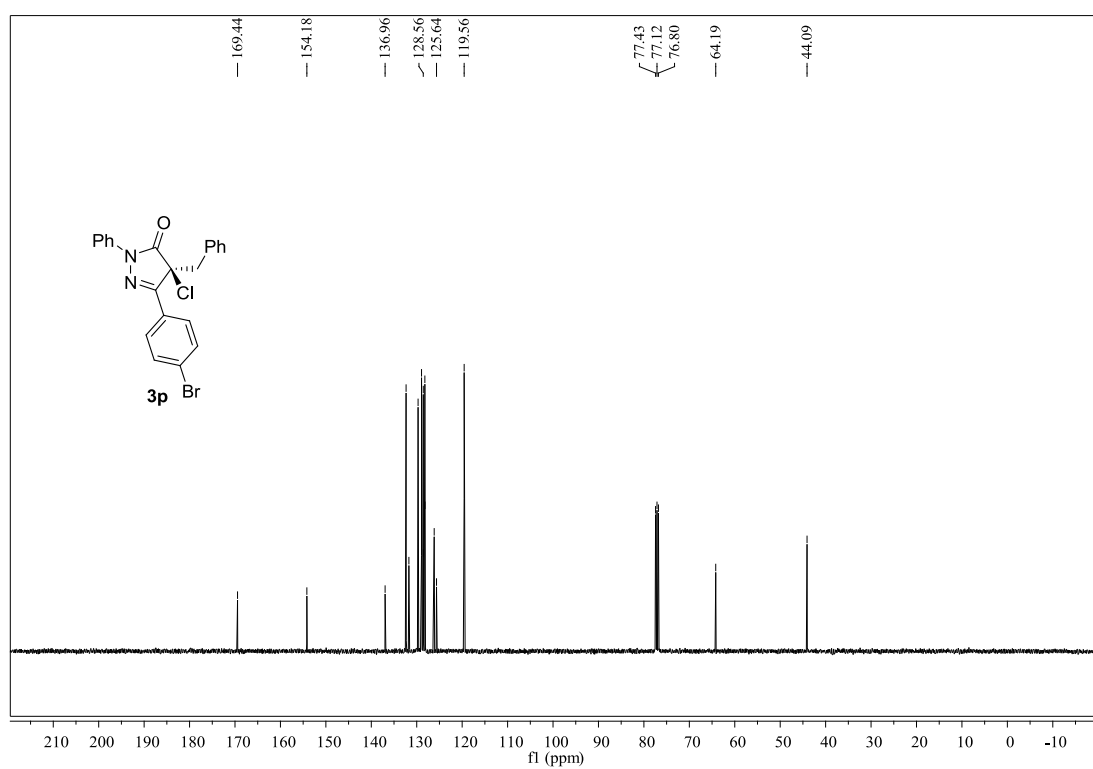

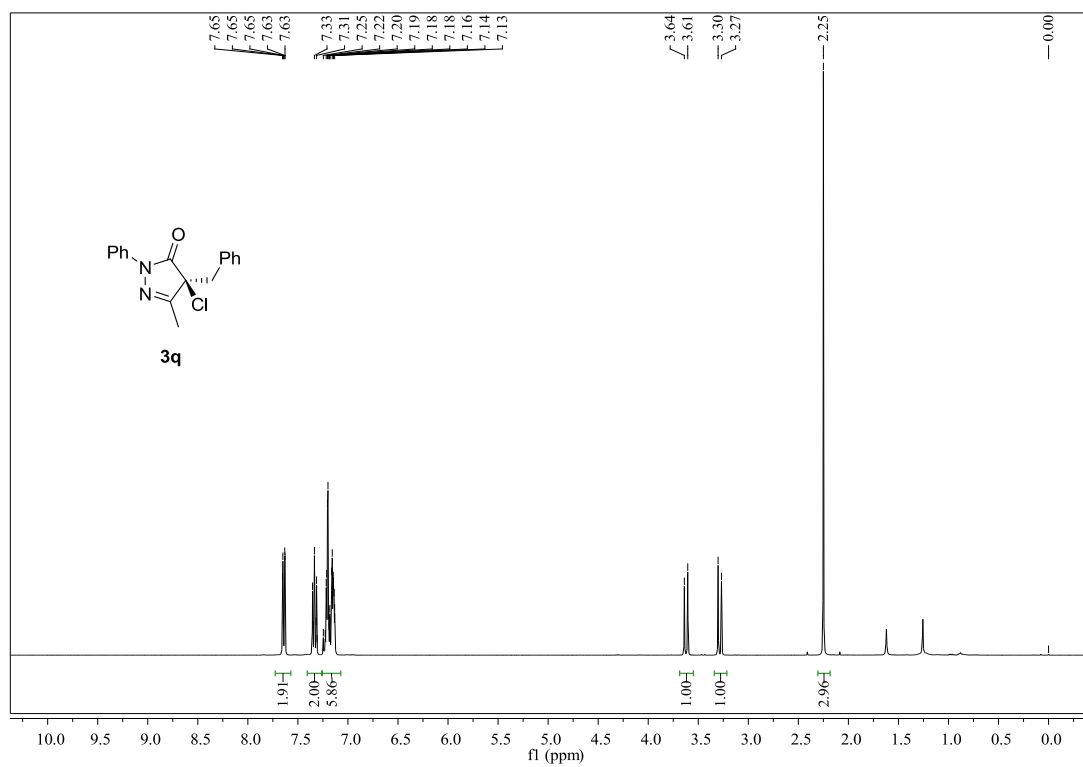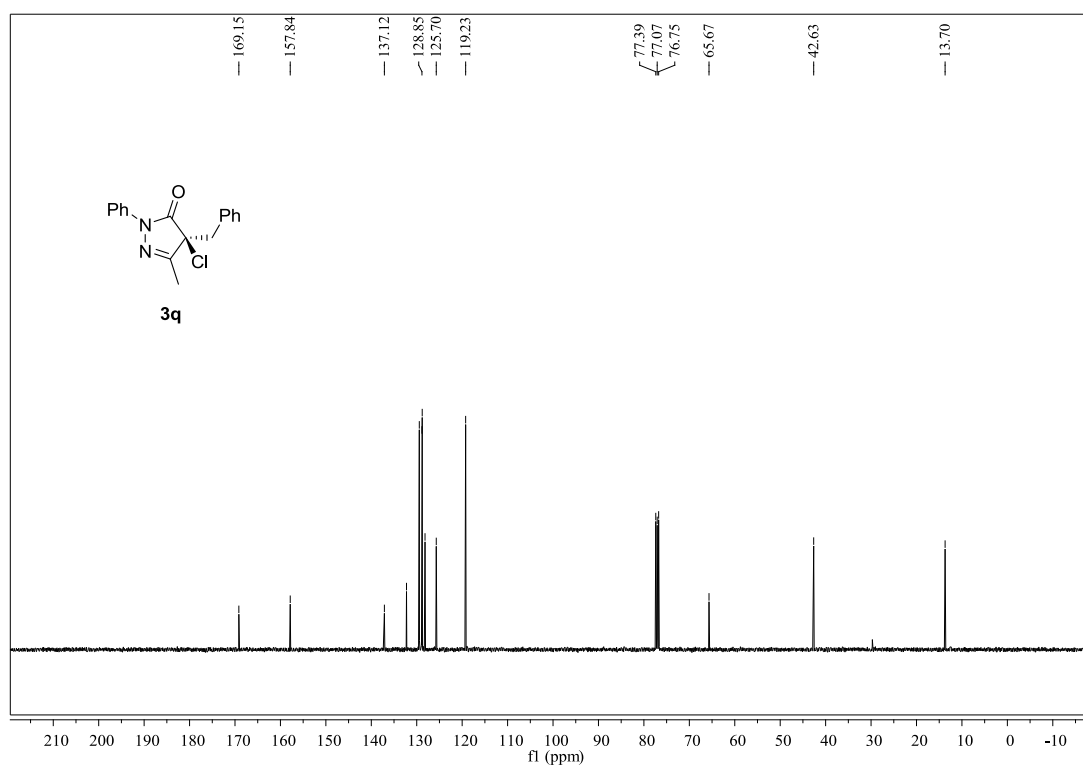

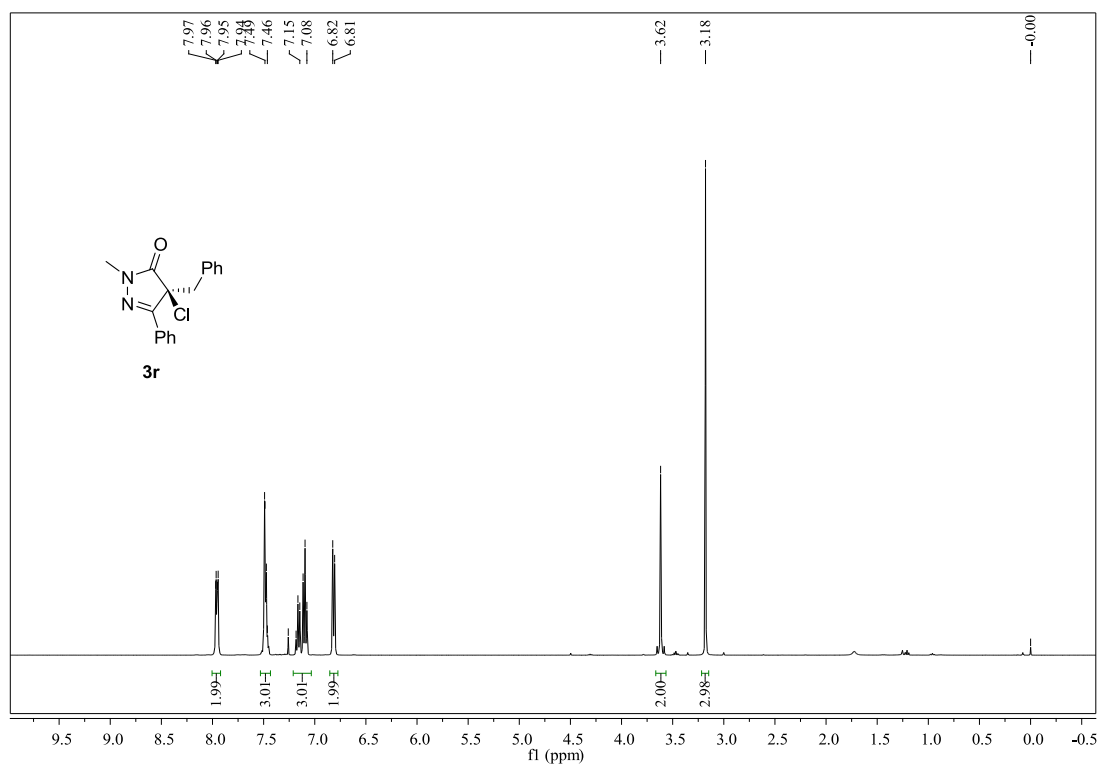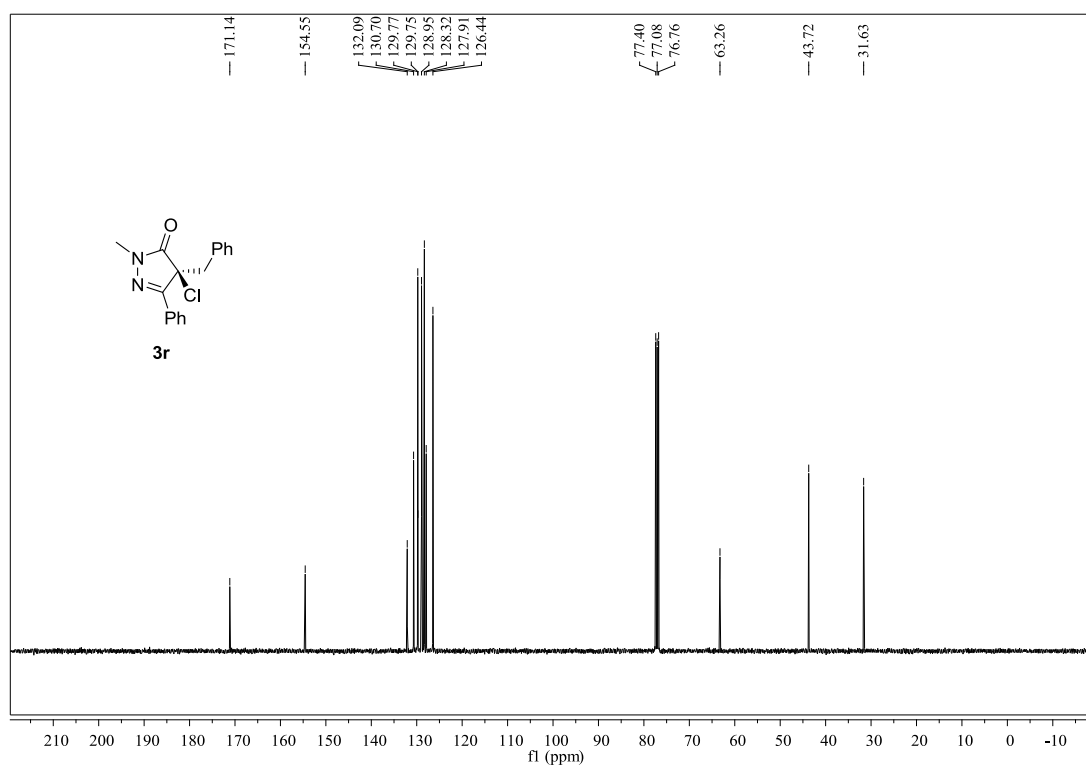



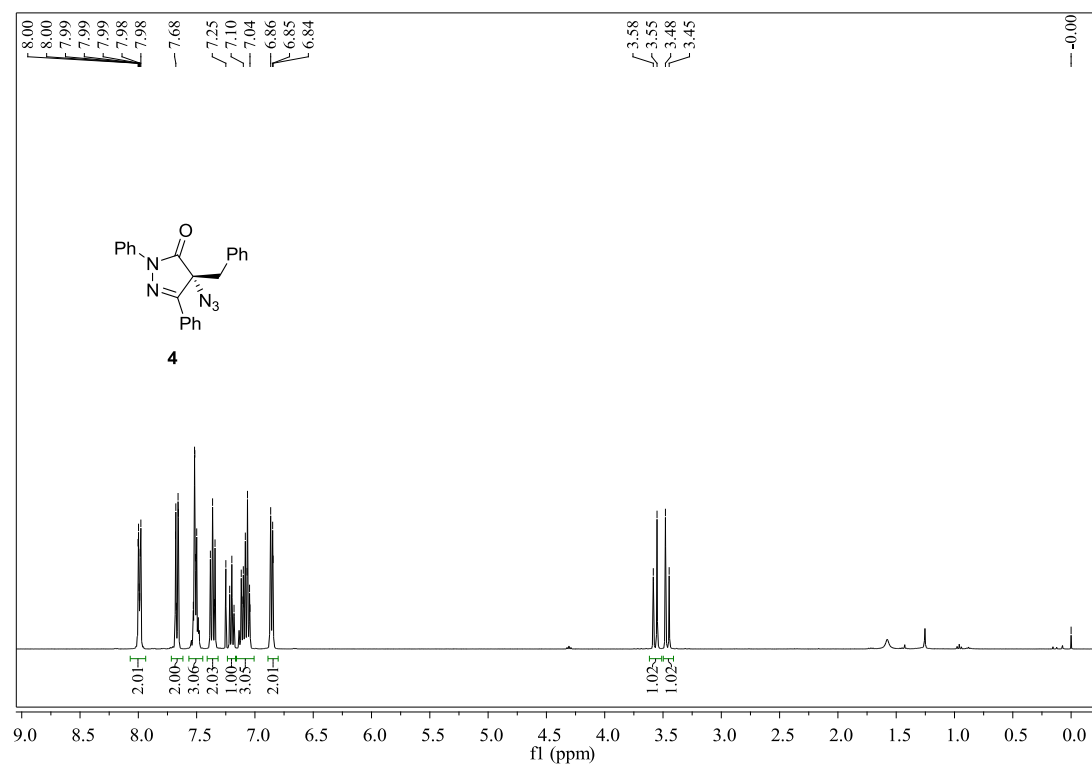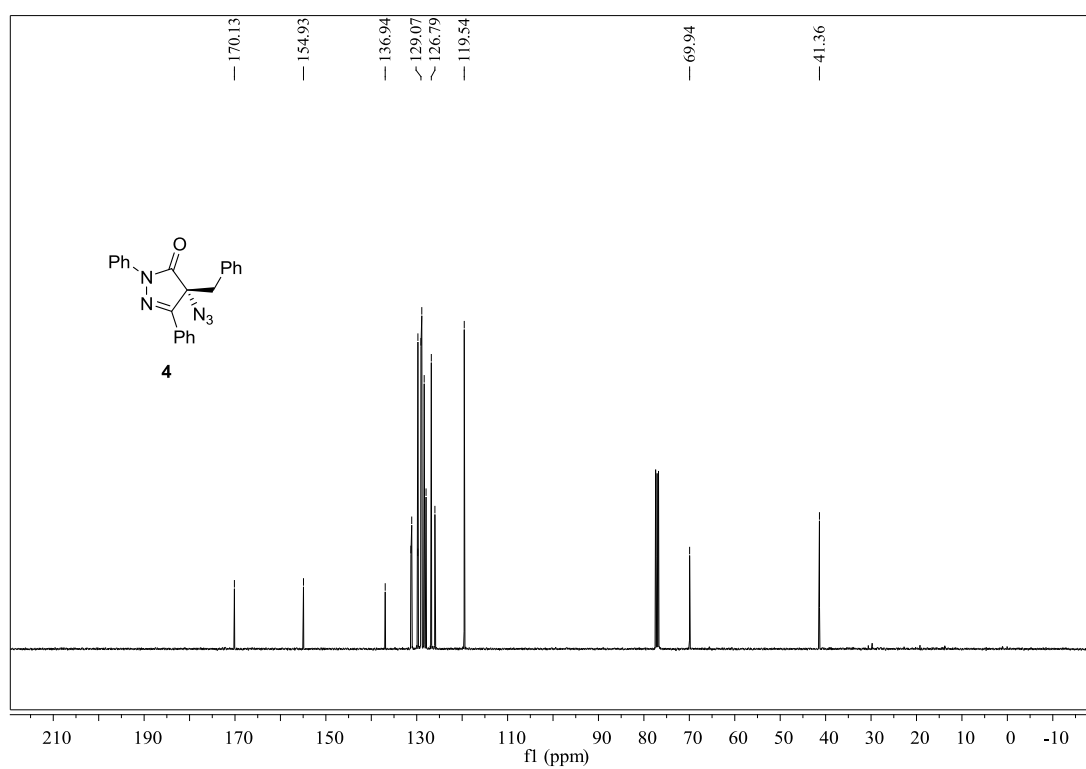

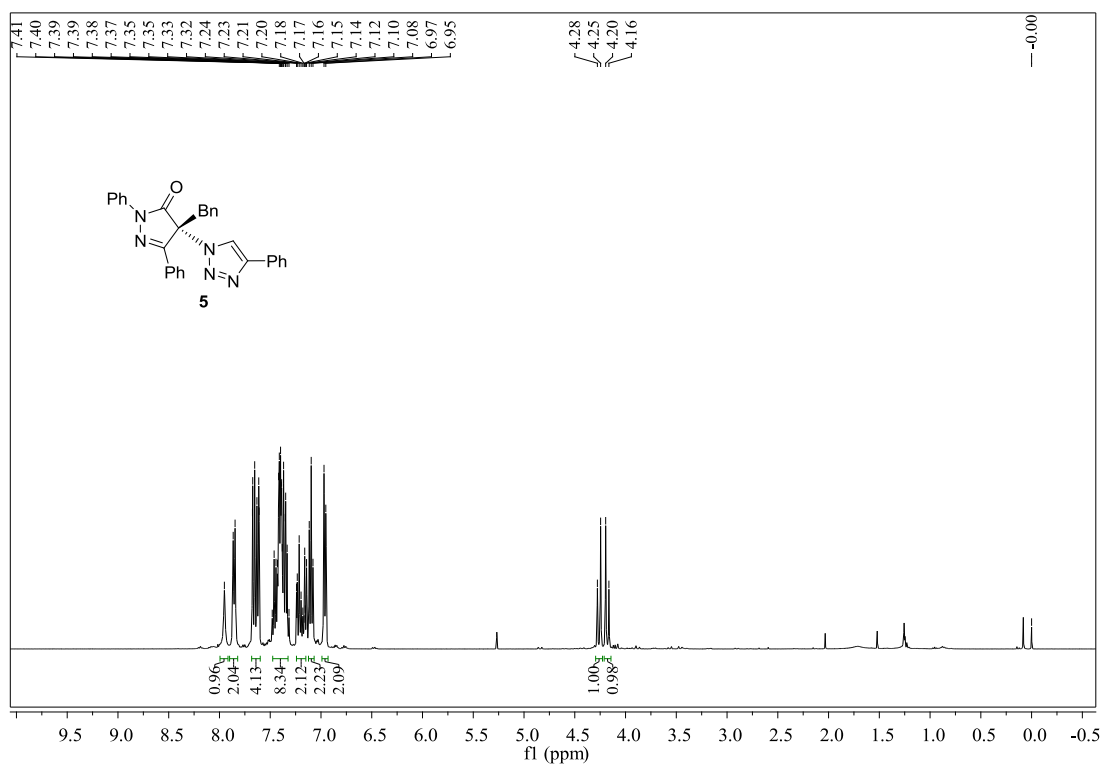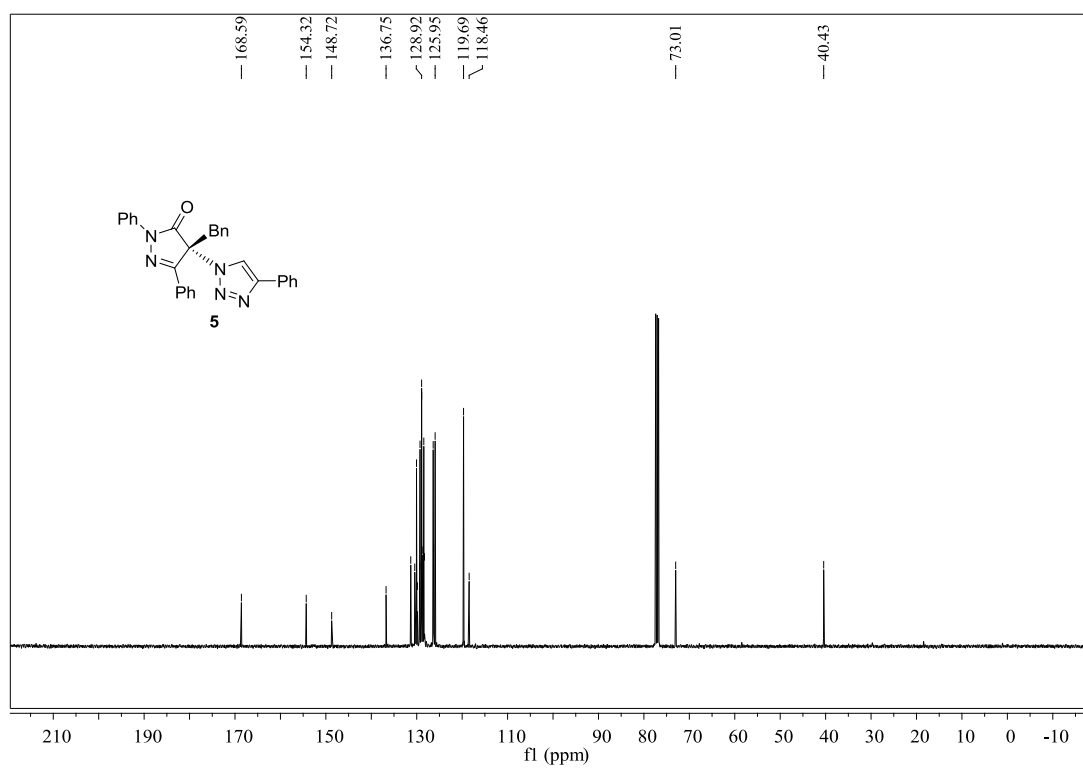

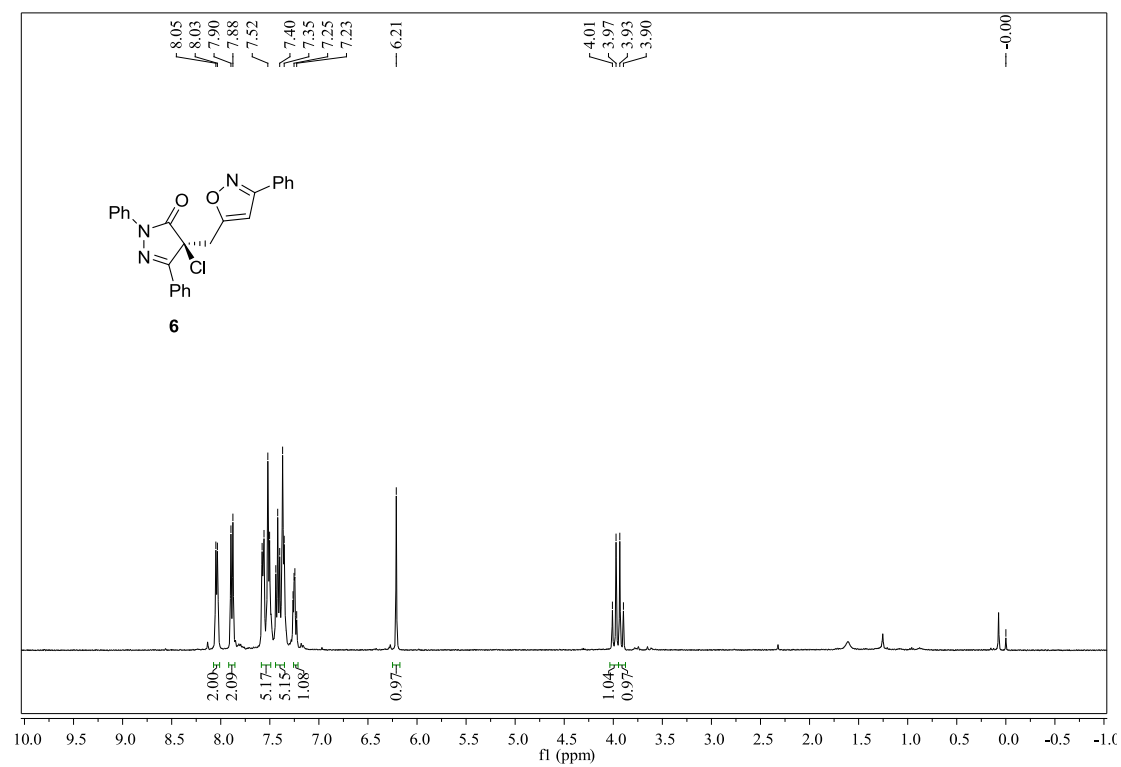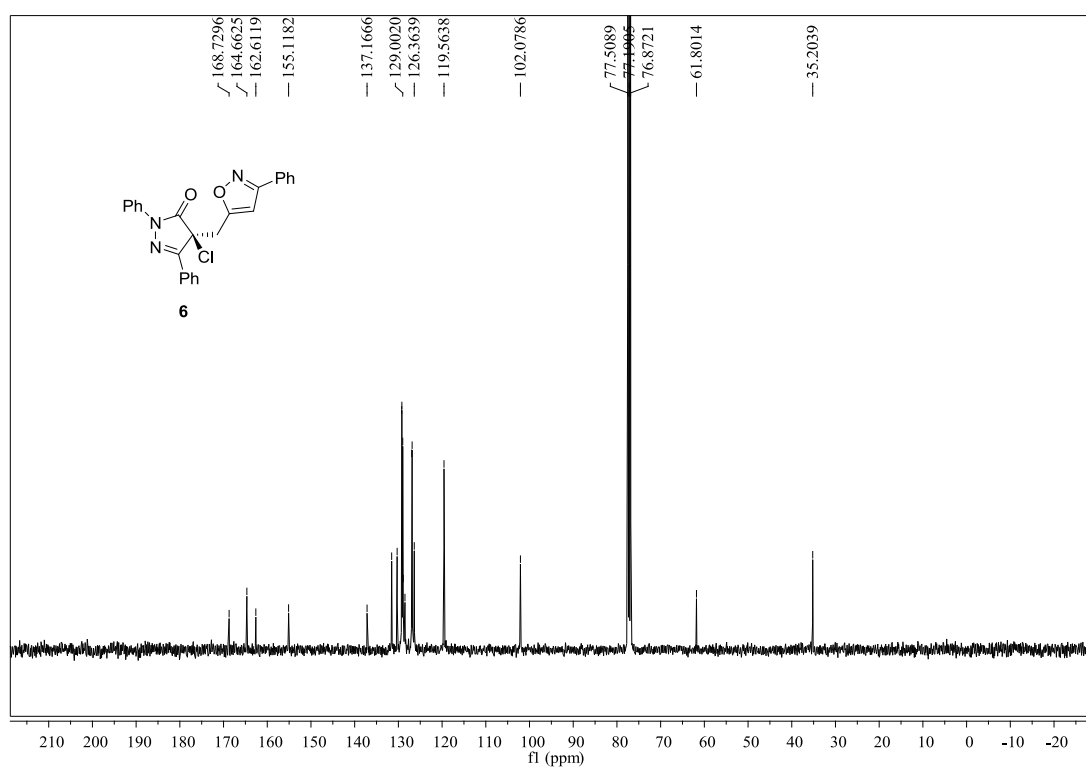

Supplement: c6cc06236a1.pdf [file c6cc06236a1.pdf]
